# Supplementary material for: Bipartite binding and partial inhibition links DEPTOR and mTOR in a mutually antagonistic embrace
Source: eLife. 2021 Sep 14;10:e68799. doi: 10.7554/eLife.68799 (PMC8439657; doi:10.7554/eLife.68799)
Supplement: Figure 1—figure supplement 1—source data 2. [file elife-68799-fig1-figsupp1-data2.xlsx]

## Sheet: Fig1-figS1
Figure 1-figure supplement 1B
[DEPTOR] (µM)	relative phosphorylation
0.00685871	1
0.0205761	0.963574
0.0617284	0.75139
0.185185	0.517293
0.555556	0.425941
1.66667	0.381488
5	0.425052
15	0.403963
