# Supplementary material for: Bipartite binding and partial inhibition links DEPTOR and mTOR in a mutually antagonistic embrace
Source: eLife. 2021 Sep 14;10:e68799. doi: 10.7554/eLife.68799 (PMC8439657; doi:10.7554/eLife.68799)
Supplement: Figure 1—source data 2. [file elife-68799-fig1-data2.xlsx]

## Sheet: Figure 1
Figure 1 A
	relative phosphorylation
[DEPTOR]	4EBP1								Tos-less 4EBP1				GST-S6K367-404
158	0.664086	0.693311	0.690066	0.664086	0.657313	0.693311	0.644044	0.535704	0.425428	0.410539	0.467117	0.414667	0.705462	0.541444	0.44	0.615262	0.601352
100	0.679244	0.621964	0.617405	0.679244	0.672316	0.621964	0.685631	0.637471	0.431681	0.440748	0.425178	0.501341	0.695758	0.621482	0.639831	0.623418	0.613332
50	0.620705	0.732861	0.67389	0.620705	0.614375	0.732861	0.678183	0.737167	0.455913	0.446755	0.486702	0.528308	0.837086	0.668402	0.745056	0.710786	0.797474
25	0.69008	0.817748	0.865245	0.69008	0.683042	0.817748	0.724892	0.84085	0.560898	0.512457	0.555718	0.600685	0.812968	0.809973	0.859778	0.738541	0.800058
12.5	0.793888	0.9089	0.888521	0.793888	0.785791	0.9089	0.70941	0.891095	0.574442	0.570697	0.553267	0.619348	0.903432	0.863286	0.884897	0.820243	0.869933
6.25	0.864682	0.898597	0.924239	0.864682	0.855863	0.898597	0.832569	0.867213	0.722977	0.6482	0.674605	0.753729	0.916523	0.895432	0.882357	0.9063	0.803993
3.125									0.806016	0.723678	0.76605	0.755947	0.919166	0.953711	0.86819	0.845394	0.929126
0	1	1	1	1	0.989802	1	1	1.01276	1	0.930482	0.945407	0.996627	0.93142	0.847734	0.906838	1	1
0					1.01635			1.01276	0.886578	1	1	0.919394	0.979385	1	1		1.179
0					0.99385			1.11191			0.985143	1	1.02061	1.03636
Figure 1 B
	relative phosphorylation
[PRAS40] (µM)	4EBP1
126	0.0175037	-0.0490242	-0.0162507
63	0.0338665	-0.012377	-0.0218334
15	0.075805	0.0137381	0.0584497
7.5	0.177777	0.0544714	0.0736799
1	0.53093	0.470015	0.410434
0.5	0.699475	0.665474	0.478916
0.25	0.669888	0.752384	0.827142
0	0.990208	1.00627	1.23205
0	1.00979	0.993731	0.767951
Figure 1 C
	relative phosphorylation
[4EBP1] (µM)	0 µM DEPTOR			25 µM DEPTOR			50 µM DEPTOR
20	1.49799	1.46151	1.49217	1.0208	1.48022	1.22971	1.01373	1.25125	1.19619
10	1.13652	1.25672	1.17176	1.04521	1.15554	1.19129	1.13286	1.37056	1.17485
5	1	1	1	1	1	1	1	1	1
2	0.604487	0.602542	0.814396	0.672009	0.534822	0.535037	0.462438	0.527791	0.56473
1	0.323494	0.260756	0.56035	0.404112	0.39515	0.394518	0.381392	0.531244	0.438647
0.5	0.137764	0.0641654	0.395428	0.201851	0.167216	0.197779	0.202391	0.330746	0.205381
0.2	0.0474675	0.00804544		0.0428461	0.06778	0.0319979	0.0257739	0.0884167	0.0374898
0.1	0.00405732	0.00072391		0.0108285	0.0131652	0.0156482	0.00554148	0.0206127	0.0138141
Figure 1 D
	relative phosphorylation
[DEPTOR] (µM)	4EBP1
100	0.341338	0.364821	0.390747
50	0.289722	0.33813	0.367105
20	0.283192	0.34169	0.342913
6.25	0.336782	0.441787	0.240448
1.56	0.571323	0.471188	0.398386
0.31	0.771254	0.805144	0.685935
0.0624	0.735431	0.901943	0.760153
0.0312	0.877623	1.00721	1.05239
0.015	1.01906	1.02746	1.14922
0	1.10331	0.998269	0.993924
0	1	1	1.00608
