# Supplementary material for: Bipartite binding and partial inhibition links DEPTOR and mTOR in a mutually antagonistic embrace
Source: eLife. 2021 Sep 14;10:e68799. doi: 10.7554/eLife.68799 (PMC8439657; doi:10.7554/eLife.68799)
Supplement: Figure 2—figure supplement 1—source data 2. [file elife-68799-fig2-figsupp1-data2.xlsx]

## Sheet: Fig2-figS1
Figure 2- figure supplement 1A
	relative phosphorylation
[PDZ] (µM)	PDZ (315-409)			PDZ (305-409)
158	0.954893	1.11992	0.878844	1.05819	1.25126	1.26296
100	1.06379	1.29125		1.367	1.3706	1.29
50	0.966156	1.19497	0.981513	1.26377	1.29411	1.18912
25	0.968096	1.23345	0.972561	1.233	1.32902	1.10427
12.5	1.00647	1.09949	1.00142	1.23878	1.20343	1.02414
6	0.900862	1.17587	1.02865	1.18202	1.14539	1.12264
3	0.893906	1.0477	1.14798	1.1027	1.18156	1.02636
0	1.02356	1	0.99685	0.991123	1	0.950215
0	0.976445		1.00315	1.00888		1.04978
Figure 2- figure supplement 1B
	relative phosphorylation
[DEPTOR] (µM)	4EBP1
158	0.687585	0.69487	0.619821	0.549304	0.651032
100	0.740011	0.707071	0.726329	0.635856	0.668926
50	0.803521	0.800508	0.699353	0.671727	0.709367
25	0.943691	0.809423	0.745403	0.742584	0.649447
12.5	1.02164	0.802302	0.83203	0.794948	0.745196
6.25		0.793962	0.90954	0.809045	0.774231
3	0.937767		0.897293	0.885838
0	1.01947	0.951557	1.18569	1.15805	0.926092
0	0.992591	1.04844	1.16115	1.10457	1.14782
0				0.895429	1.13766
Figure 2- figure supplement 1C
	relative phosphorylation
[DEPTOR 13A] (µM)	GST-S6K
20	0.519323	0.598701	0.589027
6.25	0.534648	0.497628	0.571197
1.56	0.589649	0.510757	0.583645
0.31	0.65453	0.599328	0.606722
0.15	0.718297	0.640393	0.647494
0.0624	0.891274	0.69454	0.715533
0.015	1.01755	0.810322
0.006	1.00372	0.863191	0.860071
0.003	1.05739	0.953657	0.935474
0	1	1.04612	0.980542
0	1.02181	1	1
Figure 2- figure supplement 1E
	relative phosphorylation
[DEPTOR construct] (µM)	DEPTOR	DEPDEPlinker
0	1	1
15	0.766578	0.874492
30	0.586931	0.747976
60	0.410995	0.57603
90	0.244838	0.550457
