# Supplementary material for: Bipartite binding and partial inhibition links DEPTOR and mTOR in a mutually antagonistic embrace
Source: eLife. 2021 Sep 14;10:e68799. doi: 10.7554/eLife.68799 (PMC8439657; doi:10.7554/eLife.68799)
Supplement: Figure 2—source data 2. [file elife-68799-fig2-data2.xlsx]

## Sheet: Figure 2
Figure 2 C	relative phosphorylation
[DEPTOR construct] (µM)	DEPDEPlinker						DEPDEP					Linker PDZ
158	0.929372	0.883642	0.839513	0.806682	0.971707	0.890521	1.01879	0.899517	1.13271	1.0266	1.11527	0.524933	0.459654	0.729944	0.442981	0.478099	0.547291
100	1.00786	1.03589	0.947923	0.944826	0.956502	0.99312	1.0664	1.05057	1.21708	1.0672	1.16639	0.565356	0.587552	0.684641	0.580124	0.54555	0.57702
50	1.0071	1.04315	0.930468	1.03331		0.985628	1.047	1.07199	1.11548	1.04697	1.22747	0.68581	0.698293	0.849201	0.934436	0.79369	0.709764
25	1.11713	1.12739	0.987684	1.07909	0.952764	1.02728	1.11078	1.02857	1.17888	0.989731	1.09311	0.904604	0.851322	1.0036	1.00123	0.953567	0.996824
12	1.07181	1.07523	0.895204	0.976943	0.97455	1.06932	1.10882	0.99067	1.05874	1.02509	1.03785	0.981198	0.987749	1.09526	1.06889	1.10636	1.10355
6	0.939281	1.01113	1.02325	1.02827	0.983017	1.0689	1.05949	1.03049	1.02703	1.02966	0.942782	1.13174	0.99638	1.09233	1.16152	1.0754	1.16672
3	0.904066	1.03208	1.00717	1.05604	0.964193	1.03153	1.0204	1.08189	1.07016	1.00924	0.85295	1.07029	1.02927	1.07379	1.16758		1.14466
0	1	0.877452	0.934124	1.01541	0.948612	0.943325	1.06179	1	0.958496	0.981681	0.920163		0.997639	0.962833		0.999612
0	1.09878	0.901218	0.954211	1.04768	1.10381		0.938207		1.0415	1.01832	0.957714
	relative phosphorylation
PDZ (µM)	PDZ
160	1.08152	1.17297		0.952749
135	1.134	1.19136	1.0009	0.987642
90	0.989823	1.15829	0.973202	1.0288
45	1.3273	1.08742	1.12334
22.5	1.1683	1.02911	1.15003	1.08546
0	0.914547	0.936048	1.02956	1.11006
	1.04463	1.01723	0.970441
Figure 2 D	relative phosphorylation
[DEPTOR 13A] (µM)	4EBP1							DEPTOR WT shown in:
158	0.814057	0.762006	0.863523	0.803465	0.811986	0.698003		Figure 1 A - 4EBP1
100	0.777532	0.867691	0.750717	0.76468	0.890976	0.768676
50	0.727712	0.9203		0.860181	0.923656	0.867136
25	0.775121	0.947624	0.883437	0.880678	0.890977	0.858832
12	0.825485	0.971289	0.97599	0.929636	0.896956	0.876418
6	0.892728	0.942268	0.880218	0.971848	0.877331	0.957056
3	0.961286	0.959853	0.957157	0.958221	0.906997	1.02677
0	1.00814	1.0214	0.962204	0.992468	0.955395	1
0	1.08254	0.970633	0.990806	1	1.04461
0	1.09142	0.987177	1.01276
0		1.0713	1.03423
0		0.949493	1.00417
