# Supplementary material for: Bipartite binding and partial inhibition links DEPTOR and mTOR in a mutually antagonistic embrace
Source: eLife. 2021 Sep 14;10:e68799. doi: 10.7554/eLife.68799 (PMC8439657; doi:10.7554/eLife.68799)
Supplement: Figure 5—source data 1. [file elife-68799-fig5-data1.xlsx]

## Sheet: Figure 5E 
Temperature (ºC)	PDZ (323-409)	PDZ (228-409)	PDZ (315-409)	PDZ (305-409)
15	0.002095	0.00212
15.049	0.002082	0.002118
15.098	0.002069	0.002117
15.146	0.002056	0.002115
15.195	0.002043	0.002113
15.244	0.00203	0.002111
15.293	0.002017	0.002109
15.341	0.002004	0.002107
15.39	0.001991	0.002105
15.439	0.001978	0.002104
15.488	0.001965	0.002102
15.536	0.001952	0.0021
15.585	0.001938	0.002098
15.634	0.001925	0.002096
15.683	0.001912	0.002094
15.731	0.001899	0.002092
15.78	0.001886	0.00209
15.829	0.001873	0.002088
15.878	0.001859	0.002085
15.927	0.001846	0.002083
15.975	0.001833	0.002081
16.024	0.00182	0.002079
16.073	0.001807	0.002077
16.122	0.001794	0.002075
16.17	0.001781	0.002072
16.219	0.001768	0.00207
16.268	0.001755	0.002068
16.317	0.001742	0.002066
16.365	0.001729	0.002063
16.414	0.001717	0.002061
16.463	0.001704	0.002059
16.512	0.001691	0.002056
16.56	0.001678	0.002054
16.609	0.001666	0.002052
16.658	0.001653	0.002049
16.707	0.001641	0.002047
16.756	0.001628	0.002045
16.804	0.001616	0.002042
16.853	0.001603	0.00204
16.902	0.001591	0.002037
16.951	0.001579	0.002035
16.999	0.001567	0.002032
17.048	0.001554	0.00203
17.097	0.001542	0.002027
17.146	0.00153	0.002025
17.194	0.001518	0.002022
17.243	0.001506	0.00202
17.292	0.001493	0.002017
17.341	0.001481	0.002015
17.389	0.001469	0.002012
17.438	0.001456	0.00201
17.487	0.001443	0.002007
17.536	0.00143	0.002004
17.585	0.001417	0.002002
17.633	0.001406	0.001998
17.682	0.001396	0.001994
17.731	0.001386	0.001991
17.78	0.001376	0.001987
17.828	0.001366	0.001983
17.877	0.001357	0.001979
17.926	0.001348	0.001976
17.975	0.001339	0.001972
18.023	0.00133	0.001968
18.072	0.001322	0.001964
18.121	0.001314	0.00196
18.17	0.001307	0.001956
18.218	0.001299	0.001953
18.267	0.001292	0.001949
18.316	0.001286	0.001945
18.365	0.001279	0.001941
18.414	0.001273	0.001938
18.462	0.001267	0.001934
18.511	0.001261	0.001931
18.56	0.001256	0.001927
18.609	0.001251	0.001924
18.657	0.001246	0.001921
18.706	0.001241	0.001918
18.755	0.001236	0.001915
18.804	0.001232	0.001912
18.852	0.001228	0.001909
18.901	0.001224	0.001907
18.95	0.00122	0.001904
18.999	0.001216	0.001902
19.047	0.001213	0.0019
19.096	0.00121	0.001898
19.145	0.001206	0.001896
19.194	0.001203	0.001895
19.243	0.0012	0.001894
19.291	0.001198	0.001892
19.34	0.001195	0.001891
19.389	0.001193	0.001891
19.438	0.001191	0.00189
19.486	0.001188	0.00189
19.535	0.001186	0.001889
19.584	0.001185	0.001889
19.633	0.001183	0.001889
19.681	0.001181	0.00189
19.73	0.00118	0.00189
19.779	0.001178	0.001891
19.828	0.001177	0.001892
19.876	0.001176	0.001893
19.925	0.001175	0.001894
19.974	0.001174	0.001895
20.023	0.001173	0.001897
20.072	0.001173	0.001899
20.12	0.001172	0.0019
20.169	0.001172	0.001902
20.218	0.001171	0.001905
20.267	0.001171	0.001907
20.315	0.001171	0.001909
20.364	0.001171	0.001912
20.413	0.001171	0.001915
20.462	0.001171	0.001917
20.51	0.001171	0.00192
20.559	0.001171	0.001923
20.608	0.001171	0.001926
20.657	0.001172	0.001929
20.705	0.001172	0.001932
20.754	0.001172	0.001936
20.803	0.001172	0.001939
20.852	0.001172	0.001942
20.901	0.001173	0.001946
20.949	0.001173	0.001949
20.998	0.001173	0.001953
21.047	0.001173	0.001956
21.096	0.001172	0.00196
21.144	0.001172	0.001964
21.193	0.001172	0.001967
21.242	0.001171	0.001971
21.291	0.00117	0.001975
21.339	0.001169	0.001979
21.388	0.001168	0.001982
21.437	0.001166	0.001986
21.486	0.001164	0.001989
21.534	0.001162	0.001993
21.583	0.001159	0.001996
21.632	0.001156	0.001999
21.681	0.001153	0.002003
21.73	0.001149	0.002006
21.778	0.001145	0.002009
21.827	0.001141	0.002012
21.876	0.001136	0.002014
21.925	0.001131	0.002017
21.973	0.001125	0.00202
22.022	0.001119	0.002022
22.071	0.001113	0.002024
22.12	0.001106	0.002026
22.168	0.001099	0.002028
22.217	0.001092	0.00203
22.266	0.001084	0.002032
22.315	0.001076	0.002034
22.363	0.001068	0.002036
22.412	0.001059	0.002037
22.461	0.00105	0.002039
22.51	0.001041	0.00204
22.559	0.001032	0.002042
22.607	0.001022	0.002043
22.656	0.001012	0.002044
22.705	0.001002	0.002046
22.754	0.000991	0.002047
22.802	0.000981	0.002048
22.851	0.00097	0.00205
22.9	0.000959	0.002051
22.949	0.000948	0.002052
22.997	0.000936	0.002053
23.046	0.000925	0.002055
23.095	0.000913	0.002056
23.144	0.000902	0.002058
23.192	0.00089	0.002059
23.241	0.000878	0.00206
23.29	0.000865	0.002061
23.339	0.000853	0.002063
23.388	0.00084	0.002064
23.436	0.000828	0.002065
23.485	0.000815	0.002066
23.534	0.000802	0.002067
23.583	0.000789	0.002068
23.631	0.000776	0.002069
23.68	0.000762	0.00207
23.729	0.000749	0.00207
23.778	0.000735	0.002071
23.826	0.000722	0.002071
23.875	0.000708	0.002071
23.924	0.000695	0.002071
23.973	0.000681	0.002071
24.021	0.000667	0.002071
24.07	0.000653	0.002071
24.119	0.00064	0.002071
24.168	0.000626	0.00207
24.217	0.000612	0.002069
24.265	0.000599	0.002069
24.314	0.000585	0.002068
24.363	0.000572	0.002067
24.412	0.000558	0.002066
24.46	0.000545	0.002065
24.509	0.000532	0.002064
24.558	0.00052	0.002063
24.607	0.000507	0.002061
24.655	0.000495	0.00206
24.704	0.000483	0.002059
24.753	0.000471	0.002058
24.802	0.000459	0.002057
24.85	0.000448	0.002055
24.899	0.000437	0.002054
24.948	0.000426	0.002053
24.997	0.000415	0.002052
25.046	0.000405	0.002051
25.094	0.000395	0.00205
25.143	0.000385	0.002049
25.192	0.000375	0.002048
25.241	0.000366	0.002047
25.289	0.000357	0.002046
25.338	0.000347	0.002045
25.387	0.000338	0.002045
25.436	0.00033	0.002044
25.484	0.000321	0.002044
25.533	0.000312	0.002043
25.582	0.000303	0.002043
25.631	0.000294	0.002043
25.679	0.000285	0.002043
25.728	0.000276	0.002043
25.777	0.000267	0.002043
25.826	0.000257	0.002043
25.875	0.000247	0.002044
25.923	0.000237	0.002044
25.972	0.000226	0.002044
26.021	0.000214	0.002045
26.07	0.000203	0.002046
26.118	0.00019	0.002047
26.167	0.000177	0.002048
26.216	0.000164	0.002049
26.265	0.00015	0.00205
26.313	0.000135	0.002051
26.362	0.000119	0.002053
26.411	0.000103	0.002054
26.46	8.6e-05	0.002056
26.508	6.9e-05	0.002058
26.557	5e-05	0.00206
26.606	3.2e-05	0.002063
26.655	1.2e-05	0.002065
26.704	-8e-06	0.002068
26.752	-2.9e-05	0.002071
26.801	-5.1e-05	0.002074
26.85	-7.3e-05	0.002077
26.899	-9.5e-05	0.002081
26.947	-0.000118	0.002085
26.996	-0.000142	0.002089
27.045	-0.000166	0.002093
27.094	-0.00019	0.002098
27.142	-0.000215	0.002102
27.191	-0.00024	0.002107
27.24	-0.000266	0.002112
27.289	-0.000292	0.002117
27.337	-0.000318	0.002122
27.386	-0.000344	0.002127
27.435	-0.000371	0.002133
27.484	-0.000398	0.002138
27.533	-0.000425	0.002143
27.581	-0.000453	0.002149
27.63	-0.000481	0.002154
27.679	-0.000509	0.00216
27.728	-0.000538	0.002165
27.776	-0.000567	0.00217
27.825	-0.000596	0.002175
27.874	-0.000626	0.00218
27.923	-0.000656	0.002185
27.971	-0.000686	0.002189
28.02	-0.000716	0.002194
28.069	-0.000747	0.002198
28.118	-0.000777	0.002202
28.166	-0.000809	0.002206
28.215	-0.00084	0.002209
28.264	-0.000871	0.002213
28.313	-0.000903	0.002216
28.362	-0.000935	0.002219
28.41	-0.000967	0.002221
28.459	-0.000999	0.002223
28.508	-0.001031	0.002225
28.557	-0.001063	0.002227
28.605	-0.001096	0.002229
28.654	-0.001129	0.00223
28.703	-0.001161	0.002231
28.752	-0.001194	0.002231
28.8	-0.001228	0.002231
28.849	-0.001261	0.002231
28.898	-0.001294	0.002231
28.947	-0.001328	0.002231
28.995	-0.001362	0.00223
29.044	-0.001396	0.002229
29.093	-0.00143	0.002227
29.142	-0.001465	0.002226
29.191	-0.001499	0.002224
29.239	-0.001534	0.002222
29.288	-0.001569	0.002219
29.337	-0.001604	0.002217
29.386	-0.001639	0.002214
29.434	-0.001674	0.00221
29.483	-0.00171	0.002207
29.532	-0.001745	0.002203
29.581	-0.001781	0.0022
29.629	-0.001817	0.002195
29.678	-0.001853	0.002191
29.727	-0.001889	0.002187
29.776	-0.001926	0.002182
29.824	-0.001962	0.002177
29.873	-0.001999	0.002173
29.922	-0.002035	0.002168
29.971	-0.002072	0.002162
30.02	-0.002109	0.002157
30.068	-0.002146	0.002152
30.117	-0.002183	0.002147
30.166	-0.00222	0.002142
30.215	-0.002258	0.002136
30.263	-0.002295	0.002131
30.312	-0.002333	0.002126
30.361	-0.002371	0.002121
30.41	-0.00241	0.002116
30.458	-0.002448	0.002111
30.507	-0.002487	0.002106
30.556	-0.002527	0.002101
30.605	-0.002567	0.002096
30.653	-0.002607	0.002092
30.702	-0.002647	0.002087
30.751	-0.002688	0.002083
30.8	-0.002729	0.002079
30.849	-0.002771	0.002075
30.897	-0.002813	0.002072
30.946	-0.002856	0.002069
30.995	-0.002899	0.002066
31.044	-0.002942	0.002063
31.092	-0.002986	0.002061
31.141	-0.00303	0.002059
31.19	-0.003075	0.002057
31.239	-0.00312	0.002055
31.287	-0.003166	0.002054
31.336	-0.003212	0.002053
31.385	-0.003258	0.002053
31.434	-0.003305	0.002053
31.482	-0.003352	0.002053
31.531	-0.003399	0.002053
31.58	-0.003447	0.002054
31.629	-0.003495	0.002055
31.678	-0.003543	0.002056
31.726	-0.003592	0.002057
31.775	-0.003641	0.002059
31.824	-0.00369	0.002061
31.873	-0.003739	0.002063
31.921	-0.003789	0.002065
31.97	-0.003839	0.002067
32.019	-0.003889	0.002069
32.068	-0.003939	0.002071
32.116	-0.003989	0.002074
32.165	-0.00404	0.002076
32.214	-0.004091	0.002079
32.263	-0.004141	0.002081
32.311	-0.004192	0.002083
32.36	-0.004242	0.002085
32.409	-0.004293	0.002088
32.458	-0.004343	0.00209
32.507	-0.004393	0.002091
32.555	-0.004443	0.002093
32.604	-0.004493	0.002095
32.653	-0.004543	0.002096
32.702	-0.004592	0.002097
32.75	-0.00464	0.002098
32.799	-0.004689	0.002099
32.848	-0.004736	0.0021
32.897	-0.004784	0.0021
32.945	-0.004831	0.0021
32.994	-0.004877	0.0021
33.043	-0.004923	0.002099
33.092	-0.004968	0.002098
33.14	-0.005013	0.002097
33.189	-0.005056	0.002096
33.238	-0.0051	0.002094
33.287	-0.005142	0.002092
33.336	-0.005184	0.00209
33.384	-0.005225	0.002087
33.433	-0.005265	0.002084
33.482	-0.005304	0.002081
33.531	-0.005343	0.002078
33.579	-0.00538	0.002074
33.628	-0.005417	0.002069
33.677	-0.005453	0.002065
33.726	-0.005488	0.00206
33.774	-0.005521	0.002055
33.823	-0.005554	0.002049
33.872	-0.005586	0.002043
33.921	-0.005617	0.002036
33.969	-0.005647	0.00203
34.018	-0.005676	0.002023
34.067	-0.005704	0.002015
34.116	-0.005731	0.002007
34.164	-0.005757	0.001999
34.213	-0.005781	0.00199
34.262	-0.005805	0.001982
34.311	-0.005828	0.001972
34.36	-0.00585	0.001963
34.408	-0.005871	0.001953
34.457	-0.005891	0.001943
34.506	-0.00591	0.001933
34.555	-0.005928	0.001923
34.603	-0.005945	0.001912
34.652	-0.005961	0.001901
34.701	-0.005976	0.001891
34.75	-0.00599	0.00188
34.798	-0.006004	0.001869
34.847	-0.006016	0.001857
34.896	-0.006027	0.001846
34.945	-0.006038	0.001835
34.993	-0.006048	0.001824
35.042	-0.006057	0.001813
35.091	-0.006065	0.001802
35.14	-0.006072	0.001791
35.189	-0.006078	0.001781
35.237	-0.006083	0.00177
35.286	-0.006087	0.001759
35.335	-0.00609	0.001749
35.384	-0.006093	0.001739
35.432	-0.006094	0.001729
35.481	-0.006094	0.001719
35.53	-0.006094	0.00171
35.579	-0.006092	0.0017
35.627	-0.00609	0.001691
35.676	-0.006087	0.001682
35.725	-0.006083	0.001673
35.774	-0.006077	0.001664
35.822	-0.006071	0.001656
35.871	-0.006065	0.001648
35.92	-0.006057	0.001639
35.969	-0.006048	0.001631
36.018	-0.006039	0.001623
36.066	-0.006028	0.001615
36.115	-0.006017	0.001607
36.164	-0.006005	0.001599
36.213	-0.005992	0.001591
36.261	-0.005979	0.001583
36.31	-0.005965	0.001575
36.359	-0.00595	0.001567
36.408	-0.005934	0.001559
36.456	-0.005918	0.001551
36.505	-0.005901	0.001543
36.554	-0.005884	0.001535
36.603	-0.005866	0.001527
36.651	-0.005847	0.001519
36.7	-0.005828	0.001511
36.749	-0.005809	0.001502
36.798	-0.005789	0.001494
36.847	-0.005769	0.001485
36.895	-0.005748	0.001476
36.944	-0.005726	0.001468
36.993	-0.005705	0.001459
37.042	-0.005682	0.00145
37.09	-0.00566	0.001441
37.139	-0.005637	0.001432
37.188	-0.005613	0.001423
37.237	-0.005589	0.001414
37.285	-0.005565	0.001404
37.334	-0.00554	0.001395
37.383	-0.005515	0.001385
37.432	-0.00549	0.001375
37.48	-0.005464	0.001366
37.529	-0.005437	0.001355
37.578	-0.005411	0.001345
37.627	-0.005384	0.001335
37.676	-0.005356	0.001324
37.724	-0.005328	0.001313
37.773	-0.005299	0.001302
37.822	-0.005271	0.001291
37.871	-0.005241	0.001279
37.919	-0.005212	0.001267
37.968	-0.005181	0.001255
38.017	-0.005151	0.001242
38.066	-0.00512	0.001229
38.114	-0.005088	0.001216
38.163	-0.005057	0.001202
38.212	-0.005025	0.001188
38.261	-0.004992	0.001174
38.309	-0.004959	0.001159
38.358	-0.004926	0.001144
38.407	-0.004893	0.001128
38.456	-0.004859	0.001112
38.505	-0.004825	0.001095
38.553	-0.004791	0.001078
38.602	-0.004757	0.001061
38.651	-0.004722	0.001044
38.7	-0.004688	0.001026
38.748	-0.004653	0.001007
38.797	-0.004617	0.000989
38.846	-0.004582	0.00097
38.895	-0.004547	0.00095
38.943	-0.004511	0.000931
38.992	-0.004475	0.000911
39.041	-0.004439	0.000891
39.09	-0.004403	0.00087
39.138	-0.004367	0.000849
39.187	-0.00433	0.000828
39.236	-0.004294	0.000807
39.285	-0.004257	0.000786
39.334	-0.004221	0.000764
39.382	-0.004184	0.000742
39.431	-0.004148	0.00072
39.48	-0.004111	0.000698
39.529	-0.004075	0.000675
39.577	-0.004038	0.000653
39.626	-0.004001	0.00063
39.675	-0.003964	0.000607
39.724	-0.003928	0.000584
39.772	-0.003891	0.000561
39.821	-0.003854	0.000538
39.87	-0.003816	0.000515
39.919	-0.003779	0.000491
39.967	-0.003742	0.000468
40.016	-0.003704	0.000444
40.065	-0.003667	0.000421
40.114	-0.003629	0.000397
40.163	-0.003592	0.000373
40.211	-0.003554	0.000349
40.26	-0.003516	0.000325
40.309	-0.003478	0.000301
40.358	-0.00344	0.000277
40.406	-0.003402	0.000253
40.455	-0.003363	0.000229
40.504	-0.003325	0.000204
40.553	-0.003286	0.00018
40.601	-0.003248	0.000156
40.65	-0.003209	0.000131
40.699	-0.00317	0.000107
40.748	-0.003132	8.2e-05
40.796	-0.003093	5.8e-05
40.845	-0.003054	3.3e-05
40.894	-0.003015	9e-06
40.943	-0.002976	-1.5e-05
40.992	-0.002937	-4e-05
41.04	-0.002898	-6.4e-05
41.089	-0.002859	-8.8e-05
41.138	-0.002821	-0.000112
41.187	-0.002782	-0.000136
41.235	-0.002744	-0.00016
41.284	-0.002705	-0.000184
41.333	-0.002667	-0.000208
41.382	-0.002629	-0.000232
41.43	-0.002591	-0.000255
41.479	-0.002554	-0.000279
41.528	-0.002516	-0.000302
41.577	-0.002479	-0.000325
41.625	-0.002443	-0.000348
41.674	-0.002406	-0.000371
41.723	-0.00237	-0.000394
41.772	-0.002334	-0.000417
41.821	-0.002298	-0.00044
41.869	-0.002263	-0.000462
41.918	-0.002228	-0.000485
41.967	-0.002194	-0.000507
42.016	-0.00216	-0.00053
42.064	-0.002126	-0.000552
42.113	-0.002093	-0.000574
42.162	-0.00206	-0.000596
42.211	-0.002027	-0.000617
42.259	-0.001995	-0.000639
42.308	-0.001964	-0.000661
42.357	-0.001932	-0.000682
42.406	-0.001901	-0.000704
42.454	-0.001871	-0.000725
42.503	-0.001841	-0.000746
42.552	-0.001811	-0.000767
42.601	-0.001782	-0.000788
42.65	-0.001753	-0.000808
42.698	-0.001724	-0.000829
42.747	-0.001696	-0.000849
42.796	-0.001668	-0.00087
42.845	-0.001641	-0.00089
42.893	-0.001614	-0.00091
42.942	-0.001587	-0.00093
42.991	-0.001561	-0.00095
43.04	-0.001535	-0.00097
43.088	-0.001509	-0.000989
43.137	-0.001484	-0.001009
43.186	-0.001459	-0.001028
43.235	-0.001434	-0.001048
43.283	-0.00141	-0.001067
43.332	-0.001386	-0.001086
43.381	-0.001363	-0.001106
43.43	-0.001339	-0.001125
43.479	-0.001317	-0.001145
43.527	-0.001294	-0.001164
43.576	-0.001272	-0.001183
43.625	-0.00125	-0.001203
43.674	-0.001229	-0.001222
43.722	-0.001207	-0.001242
43.771	-0.001187	-0.001262
43.82	-0.001166	-0.001282
43.869	-0.001146	-0.001301
43.917	-0.001126	-0.001321
43.966	-0.001106	-0.001342
44.015	-0.001086	-0.001362
44.064	-0.001067	-0.001382
44.112	-0.001048	-0.001403
44.161	-0.001029	-0.001423
44.21	-0.00101	-0.001444
44.259	-0.000992	-0.001465
44.308	-0.000974	-0.001485
44.356	-0.000956	-0.001506
44.405	-0.000938	-0.001527
44.454	-0.00092	-0.001548
44.503	-0.000903	-0.001569
44.551	-0.000886	-0.00159
44.6	-0.000869	-0.001611
44.649	-0.000852	-0.001632
44.698	-0.000835	-0.001653
44.746	-0.000819	-0.001674
44.795	-0.000802	-0.001695
44.844	-0.000786	-0.001717
44.893	-0.00077	-0.001738
44.941	-0.000755	-0.001758
44.99	-0.000739	-0.001779
45.039	-0.000724	-0.0018
45.088	-0.000709	-0.001821
45.137	-0.000694	-0.001841
45.185	-0.000679	-0.001861
45.234	-0.000664	-0.001882
45.283	-0.00065	-0.001902
45.332	-0.000636	-0.001921
45.38	-0.000622	-0.001941
45.429	-0.000608	-0.00196
45.478	-0.000594	-0.001979
45.527	-0.000581	-0.001998
45.575	-0.000568	-0.002016
45.624	-0.000555	-0.002034
45.673	-0.000543	-0.002052
45.722	-0.00053	-0.002069
45.77	-0.000518	-0.002086
45.819	-0.000507	-0.002102
45.868	-0.000495	-0.002118
45.917	-0.000484	-0.002134
45.966	-0.000474	-0.002149
46.014	-0.000463	-0.002164
46.063	-0.000453	-0.002178
46.112	-0.000444	-0.002192
46.161	-0.000434	-0.002206
46.209	-0.000425	-0.002218
46.258	-0.000416	-0.002231
46.307	-0.000408	-0.002242
46.356	-0.0004	-0.002254
46.404	-0.000392	-0.002264
46.453	-0.000384	-0.002274
46.502	-0.000377	-0.002284
46.551	-0.00037	-0.002293
46.599	-0.000363	-0.002301
46.648	-0.000356	-0.002309
46.697	-0.00035	-0.002316
46.746	-0.000344	-0.002322
46.795	-0.000338	-0.002328
46.843	-0.000332	-0.002334
46.892	-0.000326	-0.002338
46.941	-0.000321	-0.002342
46.99	-0.000316	-0.002345
47.038	-0.000311	-0.002348
47.087	-0.000306	-0.00235
47.136	-0.000301	-0.002352
47.185	-0.000297	-0.002352
47.233	-0.000292	-0.002352
47.282	-0.000288	-0.002352
47.331	-0.000284	-0.002351
47.38	-0.00028	-0.002349
47.428	-0.000276	-0.002346
47.477	-0.000272	-0.002343
47.526	-0.000268	-0.002339
47.575	-0.000264	-0.002335
47.624	-0.00026	-0.00233
47.672	-0.000257	-0.002325
47.721	-0.000253	-0.002319
47.77	-0.00025	-0.002312
47.819	-0.000246	-0.002305
47.867	-0.000242	-0.002298
47.916	-0.000239	-0.00229
47.965	-0.000235	-0.002281
48.014	-0.000232	-0.002272
48.062	-0.000228	-0.002263
48.111	-0.000224	-0.002253
48.16	-0.00022	-0.002243
48.209	-0.000216	-0.002233
48.257	-0.000212	-0.002222
48.306	-0.000208	-0.002211
48.355	-0.000204	-0.002199
48.404	-0.0002	-0.002188
48.453	-0.000195	-0.002176
48.501	-0.000191	-0.002163
48.55	-0.000186	-0.002151
48.599	-0.000182	-0.002138
48.648	-0.000177	-0.002125
48.696	-0.000172	-0.002112
48.745	-0.000167	-0.002098
48.794	-0.000162	-0.002085
48.843	-0.000157	-0.002071
48.891	-0.000152	-0.002057
48.94	-0.000147	-0.002043
48.989	-0.000142	-0.002028
49.038	-0.000137	-0.002014
49.086	-0.000131	-0.001999
49.135	-0.000126	-0.001985
49.184	-0.00012	-0.00197
49.233	-0.000114	-0.001955
49.282	-0.000108	-0.00194
49.33	-0.000103	-0.001925
49.379	-9.7e-05	-0.001909
49.428	-9.1e-05	-0.001894
49.477	-8.5e-05	-0.001878
49.525	-7.9e-05	-0.001863
49.574	-7.2e-05	-0.001847
49.623	-6.6e-05	-0.001831
49.672	-6e-05	-0.001815
49.72	-5.4e-05	-0.001799
49.769	-4.8e-05	-0.001783
49.818	-4.2e-05	-0.001767
49.867	-3.6e-05	-0.00175
49.915	-3e-05	-0.001734
49.964	-2.4e-05	-0.001717
50.013	-1.8e-05	-0.001701
50.062	-1.2e-05	-0.001684
50.111	-6e-06	-0.001668
50.159	-1e-06	-0.001651
50.208	5e-06	-0.001634
50.257	1e-05	-0.001617
50.306	1.5e-05	-0.0016
50.354	2.1e-05	-0.001583
50.403	2.6e-05	-0.001565
50.452	3.1e-05	-0.001548
50.501	3.5e-05	-0.001531
50.549	4e-05	-0.001513
50.598	4.5e-05	-0.001496
50.647	4.9e-05	-0.001478
50.696	5.3e-05	-0.00146
50.744	5.7e-05	-0.001442
50.793	6.1e-05	-0.001424
50.842	6.5e-05	-0.001406
50.891	6.8e-05	-0.001388
50.94	7.1e-05	-0.001369
50.988	7.5e-05	-0.001351
51.037	7.7e-05	-0.001332
51.086	8e-05	-0.001314
51.135	8.3e-05	-0.001295
51.183	8.5e-05	-0.001276
51.232	8.7e-05	-0.001257
51.281	8.9e-05	-0.001238
51.33	9.1e-05	-0.001219
51.378	9.3e-05	-0.0012
51.427	9.4e-05	-0.001181
51.476	9.5e-05	-0.001161
51.525	9.6e-05	-0.001142
51.573	9.7e-05	-0.001122
51.622	9.7e-05	-0.001102
51.671	9.8e-05	-0.001083
51.72	9.8e-05	-0.001063
51.769	9.8e-05	-0.001043
51.817	9.8e-05	-0.001023
51.866	9.7e-05	-0.001003
51.915	9.7e-05	-0.000983
51.964	9.6e-05	-0.000963
52.012	9.6e-05	-0.000944
52.061	9.5e-05	-0.000924
52.11	9.4e-05	-0.000904
52.159	9.3e-05	-0.000885
52.207	9.3e-05	-0.000865
52.256	9.2e-05	-0.000846
52.305	9.1e-05	-0.000827
52.354	9e-05	-0.000808
52.402	8.9e-05	-0.000789
52.451	8.8e-05	-0.000771
52.5	8.7e-05	-0.000752
52.549	8.7e-05	-0.000734
52.598	8.6e-05	-0.000716
52.646	8.6e-05	-0.000698
52.695	8.5e-05	-0.000681
52.744	8.5e-05	-0.000664
52.793	8.5e-05	-0.000647
52.841	8.5e-05	-0.00063
52.89	8.5e-05	-0.000614
52.939	8.5e-05	-0.000597
52.988	8.6e-05	-0.000581
53.036	8.6e-05	-0.000566
53.085	8.8e-05	-0.00055
53.134	8.9e-05	-0.000535
53.183	9e-05	-0.00052
53.231	9.2e-05	-0.000506
53.28	9.4e-05	-0.000491
53.329	9.6e-05	-0.000477
53.378	9.9e-05	-0.000463
53.427	0.000102	-0.00045
53.475	0.000105	-0.000436
53.524	0.000108	-0.000423
53.573	0.000111	-0.000411
53.622	0.000115	-0.000398
53.67	0.000119	-0.000386
53.719	0.000123	-0.000374
53.768	0.000127	-0.000363
53.817	0.000131	-0.000351
53.865	0.000136	-0.00034
53.914	0.00014	-0.000329
53.963	0.000145	-0.000319
54.012	0.00015	-0.000309
54.06	0.000154	-0.000299
54.109	0.000159	-0.000289
54.158	0.000164	-0.00028
54.207	0.000169	-0.000271
54.256	0.000174	-0.000263
54.304	0.000178	-0.000255
54.353	0.000183	-0.000247
54.402	0.000187	-0.000239
54.451	0.000192	-0.000232
54.499	0.000196	-0.000225
54.548	0.0002	-0.000219
54.597	0.000204	-0.000212
54.646	0.000208	-0.000206
54.694	0.000212	-0.0002
54.743	0.000216	-0.000195
54.792	0.000219	-0.000189
54.841	0.000222	-0.000184
54.889	0.000226	-0.000179
54.938	0.000229	-0.000174
54.987	0.000231	-0.000169
55.036	0.000234	-0.000165
55.085	0.000237	-0.00016
55.133	0.000239	-0.000156
55.182	0.000241	-0.000152
55.231	0.000243	-0.000147
55.28	0.000245	-0.000143
55.328	0.000246	-0.000139
55.377	0.000248	-0.000135
55.426	0.000249	-0.000131
55.475	0.00025	-0.000127
55.523	0.000251	-0.000123
55.572	0.000251	-0.000119
55.621	0.000252	-0.000114
55.67	0.000253	-0.00011
55.718	0.000253	-0.000106
55.767	0.000253	-0.000102
55.816	0.000254	-9.7e-05
55.865	0.000254	-9.3e-05
55.914	0.000254	-8.8e-05
55.962	0.000254	-8.3e-05
56.011	0.000254	-7.9e-05
56.06	0.000254	-7.4e-05
56.109	0.000254	-6.9e-05
56.157	0.000254	-6.3e-05
56.206	0.000254	-5.8e-05
56.255	0.000254	-5.3e-05
56.304	0.000254	-4.7e-05
56.352	0.000254	-4.1e-05
56.401	0.000254	-3.5e-05
56.45	0.000255	-2.9e-05
56.499	0.000255	-2.3e-05
56.547	0.000255	-1.6e-05
56.596	0.000255	-1e-05
56.645	0.000256	-3e-06
56.694	0.000256	4e-06
56.743	0.000257	1.1e-05
56.791	0.000257	1.8e-05
56.84	0.000258	2.6e-05
56.889	0.000259	3.3e-05
56.938	0.00026	4.1e-05
56.986	0.000261	4.9e-05
57.035	0.000262	5.8e-05
57.084	0.000263	6.6e-05
57.133	0.000265	7.5e-05
57.181	0.000267	8.4e-05
57.23	0.000269	9.3e-05
57.279	0.000271	0.000103
57.328	0.000273	0.000112
57.376	0.000275	0.000122
57.425	0.000278	0.000132
57.474	0.000281	0.000142
57.523	0.000285	0.000152
57.572	0.000288	0.000163
57.62	0.000292	0.000173
57.669	0.000296	0.000184
57.718	0.0003	0.000194
57.767	0.000305	0.000205
57.815	0.00031	0.000215
57.864	0.000315	0.000226
57.913	0.00032	0.000236
57.962	0.000325	0.000247
58.01	0.000331	0.000257
58.059	0.000337	0.000267
58.108	0.000342	0.000278
58.157	0.000348	0.000288
58.205	0.000355	0.000298
58.254	0.000361	0.000307
58.303	0.000367	0.000317
58.352	0.000373	0.000326
58.401	0.000379	0.000335
58.449	0.000385	0.000344
58.498	0.000392	0.000353
58.547	0.000398	0.000361
58.596	0.000404	0.000369
58.644	0.000409	0.000377
58.693	0.000415	0.000385
58.742	0.000421	0.000392
58.791	0.000426	0.000399
58.839	0.000431	0.000406
58.888	0.000436	0.000413
58.937	0.000441	0.000419
58.986	0.000445	0.000425
59.034	0.00045	0.000431
59.083	0.000454	0.000436
59.132	0.000457	0.000442
59.181	0.000461	0.000447
59.23	0.000464	0.000452
59.278	0.000467	0.000456
59.327	0.00047	0.000461
59.376	0.000472	0.000465
59.425	0.000474	0.00047
59.473	0.000476	0.000474
59.522	0.000478	0.000477
59.571	0.000479	0.000481
59.62	0.00048	0.000484
59.668	0.000481	0.000488
59.717	0.000482	0.000491
59.766	0.000482	0.000494
59.815	0.000483	0.000496
59.863	0.000483	0.000499
59.912	0.000483	0.000501
59.961	0.000482	0.000503
60.01	0.000482	0.000506
60.059	0.000481	0.000508
60.107	0.00048	0.000509
60.156	0.00048	0.000511
60.205	0.000479	0.000513
60.254	0.000478	0.000514
60.302	0.000477	0.000516
60.351	0.000476	0.000518
60.4	0.000476	0.000519
60.449	0.000475	0.000521
60.497	0.000474	0.000522
60.546	0.000473	0.000524
60.595	0.000473	0.000526
60.644	0.000472	0.000528
60.692	0.000472	0.00053
60.741	0.000472	0.000532
60.79	0.000471	0.000534
60.839	0.000471	0.000536
60.888	0.000471	0.000539
60.936	0.000471	0.000542
60.985	0.000472	0.000544
61.034	0.000472	0.000547
61.083	0.000473	0.000551
61.131	0.000473	0.000554
61.18	0.000474	0.000557
61.229	0.000475	0.000561
61.278	0.000475	0.000565
61.326	0.000476	0.000569
61.375	0.000477	0.000573
61.424	0.000479	0.000577
61.473	0.00048	0.000582
61.521	0.000481	0.000586
61.57	0.000483	0.000591
61.619	0.000484	0.000595
61.668	0.000486	0.0006
61.717	0.000488	0.000605
61.765	0.00049	0.00061
61.814	0.000492	0.000614
61.863	0.000495	0.000619
61.912	0.000497	0.000624
61.96	0.0005	0.000629
62.009	0.000503	0.000633
62.058	0.000506	0.000638
62.107	0.000509	0.000643
62.155	0.000512	0.000647
62.204	0.000515	0.000652
62.253	0.000518	0.000656
62.302	0.000521	0.000661
62.35	0.000525	0.000665
62.399	0.000528	0.000669
62.448	0.000532	0.000673
62.497	0.000535	0.000677
62.546	0.000538	0.000681
62.594	0.000542	0.000685
62.643	0.000545	0.000689
62.692	0.000549	0.000693
62.741	0.000552	0.000697
62.789	0.000555	0.0007
62.838	0.000558	0.000704
62.887	0.000561	0.000707
62.936	0.000564	0.000711
62.984	0.000567	0.000714
63.033	0.00057	0.000717
63.082	0.000573	0.00072
63.131	0.000575	0.000723
63.179	0.000578	0.000725
63.228	0.00058	0.000728
63.277	0.000582	0.00073
63.326	0.000585	0.000732
63.375	0.000587	0.000734
63.423	0.000588	0.000736
63.472	0.00059	0.000738
63.521	0.000592	0.000739
63.57	0.000593	0.00074
63.618	0.000594	0.000742
63.667	0.000595	0.000743
63.716	0.000596	0.000744
63.765	0.000597	0.000744
63.813	0.000597	0.000745
63.862	0.000597	0.000746
63.911	0.000597	0.000746
63.96	0.000597	0.000747
64.008	0.000597	0.000747
64.057	0.000596	0.000748
64.106	0.000595	0.000748
64.155	0.000594	0.000749
64.204	0.000593	0.00075
64.252	0.000591	0.00075
64.301	0.00059	0.000751
64.35	0.000588	0.000752
64.399	0.000586	0.000753
64.447	0.000584	0.000755
64.496	0.000582	0.000756
64.545	0.000579	0.000758
64.594	0.000577	0.00076
64.642	0.000575	0.000762
64.691	0.000573	0.000764
64.74	0.00057	0.000767
64.789	0.000568	0.000769
64.837	0.000566	0.000773
64.886	0.000564	0.000776
64.935	0.000562	0.000779
64.984	0.00056	0.000783
65.033	0.000558	0.000787
65.081	0.000556	0.000792
65.13	0.000554	0.000796
65.179	0.000553	0.000801
65.228	0.000551	0.000806
65.276	0.00055	0.000811
65.325	0.000548	0.000817
65.374	0.000547	0.000822
65.423	0.000546	0.000828
65.471	0.000544	0.000834
65.52	0.000543	0.00084
65.569	0.000542	0.000846
65.618	0.000541	0.000852
65.666	0.00054	0.000858
65.715	0.00054	0.000864
65.764	0.000539	0.00087
65.813	0.000539	0.000876
65.862	0.000539	0.000882
65.91	0.000538	0.000889
65.959	0.000539	0.000895
66.008	0.000539	0.000901
66.057	0.000539	0.000906
66.105	0.00054	0.000912
66.154	0.000541	0.000918
66.203	0.000542	0.000924
66.252	0.000543	0.00093
66.3	0.000545	0.000935
66.349	0.000546	0.000941
66.398	0.000548	0.000946
66.447	0.000551	0.000952
66.495	0.000553	0.000957
66.544	0.000555	0.000962
66.593	0.000558	0.000967
66.642	0.000561	0.000972
66.691	0.000564	0.000977
66.739	0.000567	0.000982
66.788	0.00057	0.000987
66.837	0.000574	0.000992
66.886	0.000577	0.000996
66.934	0.000581	0.001001
66.983	0.000584	0.001005
67.032	0.000588	0.001009
67.081	0.000592	0.001013
67.129	0.000596	0.001017
67.178	0.0006	0.001021
67.227	0.000604	0.001024
67.276	0.000608	0.001028
67.324	0.000612	0.001031
67.373	0.000616	0.001034
67.422	0.00062	0.001037
67.471	0.000624	0.001039
67.52	0.000629	0.001042
67.568	0.000633	0.001044
67.617	0.000637	0.001046
67.666	0.000641	0.001047
67.715	0.000645	0.001048
67.763	0.000649	0.001049
67.812	0.000653	0.00105
67.861	0.000657	0.001051
67.91	0.00066	0.001051
67.958	0.000664	0.001051
68.007	0.000667	0.001051
68.056	0.00067	0.00105
68.105	0.000673	0.00105
68.153	0.000676	0.001049
68.202	0.000679	0.001048
68.251	0.000681	0.001047
68.3	0.000683	0.001046
68.349	0.000685	0.001045
68.397	0.000687	0.001043
68.446	0.000688	0.001042
68.495	0.00069	0.001041
68.544	0.000691	0.00104
68.592	0.000691	0.001038
68.641	0.000692	0.001037
68.69	0.000693	0.001036
68.739	0.000693	0.001035
68.787	0.000693	0.001034
68.836	0.000693	0.001033
68.885	0.000693	0.001033
68.934	0.000693	0.001032
68.982	0.000693	0.001032
69.031	0.000693	0.001031
69.08	0.000692	0.001031
69.129	0.000692	0.00103
69.178	0.000692	0.00103
69.226	0.000691	0.00103
69.275	0.00069	0.00103
69.324	0.00069	0.00103
69.373	0.000689	0.001031
69.421	0.000688	0.001031
69.47	0.000687	0.001031
69.519	0.000686	0.001032
69.568	0.000685	0.001032
69.616	0.000684	0.001033
69.665	0.000683	0.001034
69.714	0.000682	0.001035
69.763	0.000681	0.001036
69.811	0.00068	0.001037
69.86	0.000679	0.001038
69.909	0.000677	0.001039
69.958	0.000676	0.00104
70.007	0.000675	0.001042
70.055	0.000673	0.001043
70.104	0.000672	0.001045
70.153	0.000671	0.001046
70.202	0.000669	0.001048
70.25	0.000668	0.00105
70.299	0.000666	0.001051
70.348	0.000665	0.001053
70.397	0.000664	0.001055
70.445	0.000662	0.001057
70.494	0.000661	0.001059
70.543	0.00066	0.001061
70.592	0.000658	0.001063
70.64	0.000657	0.001065
70.689	0.000656	0.001068
70.738	0.000654	0.00107
70.787	0.000653	0.001072
70.836	0.000652	0.001074
70.884	0.000651	0.001077
70.933	0.00065	0.001079
70.982	0.000649	0.001081
71.031	0.000648	0.001083
71.079	0.000647	0.001086
71.128	0.000646	0.001088
71.177	0.000645	0.00109
71.226	0.000644	0.001092
71.274	0.000644	0.001094
71.323	0.000643	0.001096
71.372	0.000643	0.001098
71.421	0.000642	0.0011
71.469	0.000642	0.001102
71.518	0.000642	0.001103
71.567	0.000642	0.001105
71.616	0.000642	0.001106
71.664	0.000643	0.001107
71.713	0.000643	0.001109
71.762	0.000644	0.00111
71.811	0.000644	0.001111
71.86	0.000645	0.001111
71.908	0.000646	0.001112
71.957	0.000646	0.001113
72.006	0.000647	0.001113
72.055	0.000648	0.001113
72.103	0.000649	0.001114
72.152	0.00065	0.001114
72.201	0.000651	0.001114
72.25	0.000652	0.001113
72.298	0.000653	0.001113
72.347	0.000654	0.001113
72.396	0.000655	0.001112
72.445	0.000656	0.001112
72.493	0.000658	0.001111
72.542	0.000659	0.00111
72.591	0.00066	0.00111
72.64	0.000661	0.001109
72.689	0.000662	0.001108
72.737	0.000663	0.001107
72.786	0.000665	0.001107
72.835	0.000666	0.001106
72.884	0.000667	0.001106
72.932	0.000668	0.001105
72.981	0.00067	0.001105
73.03	0.000671	0.001104
73.079	0.000672	0.001104
73.127	0.000674	0.001104
73.176	0.000676	0.001104
73.225	0.000677	0.001104
73.274	0.000679	0.001104
73.322	0.000681	0.001105
73.371	0.000683	0.001105
73.42	0.000686	0.001106
73.469	0.000688	0.001106
73.518	0.000691	0.001107
73.566	0.000694	0.001108
73.615	0.000697	0.001109
73.664	0.0007	0.00111
73.713	0.000704	0.001111
73.761	0.000708	0.001113
73.81	0.000712	0.001114
73.859	0.000717	0.001115
73.908	0.000721	0.001117
73.956	0.000727	0.001119
74.005	0.000732	0.00112
74.054	0.000738	0.001122
74.103	0.000744	0.001124
74.151	0.000751	0.001126
74.2	0.000757	0.001128
74.249	0.000765	0.00113
74.298	0.000772	0.001132
74.347	0.00078	0.001134
74.395	0.000788	0.001137
74.444	0.000797	0.001139
74.493	0.000805	0.001141
74.542	0.000814	0.001144
74.59	0.000823	0.001146
74.639	0.000833	0.001149
74.688	0.000842	0.001151
74.737	0.000852	0.001154
74.785	0.000861	0.001156
74.834	0.000871	0.001159
74.883	0.00088	0.001162
74.932	0.00089	0.001164
74.98	0.000899	0.001167
75.029	0.000908	0.001169
75.078	0.000917	0.001172
75.127	0.000926	0.001175
75.176	0.000935	0.001177
75.224	0.000943	0.00118
75.273	0.000951	0.001182
75.322	0.000958	0.001184
75.371	0.000966	0.001186
75.419	0.000973	0.001189
75.468	0.000979	0.001191
75.517	0.000985	0.001193
75.566	0.000991	0.001194
75.614	0.000997	0.001196
75.663	0.001002	0.001198
75.712	0.001006	0.001199
75.761	0.00101	0.001201
75.809	0.001014	0.001202
75.858	0.001017	0.001203
75.907	0.001019	0.001204
75.956	0.001022	0.001205
76.005	0.001023	0.001205
76.053	0.001024	0.001206
76.102	0.001025	0.001206
76.151	0.001025	0.001207
76.2	0.001025	0.001207
76.248	0.001024	0.001207
76.297	0.001023	0.001207
76.346	0.001021	0.001207
76.395	0.001018	0.001207
76.443	0.001016	0.001206
76.492	0.001012	0.001206
76.541	0.001009	0.001205
76.59	0.001005	0.001204
76.638	0.001	0.001204
76.687	0.000995	0.001203
76.736	0.00099	0.001202
76.785	0.000984	0.001201
76.834	0.000978	0.0012
76.882	0.000972	0.001199
76.931	0.000965	0.001198
76.98	0.000958	0.001197
77.029	0.000951	0.001195
77.077	0.000944	0.001194
77.126	0.000937	0.001193
77.175	0.000929	0.001192
77.224	0.000922	0.001191
77.272	0.000914	0.00119
77.321	0.000907	0.001189
77.37	0.000899	0.001188
77.419	0.000891	0.001187
77.467	0.000883	0.001186
77.516	0.000875	0.001185
77.565	0.000868	0.001185
77.614	0.00086	0.001184
77.663	0.000852	0.001184
77.711	0.000844	0.001183
77.76	0.000837	0.001183
77.809	0.000829	0.001183
77.858	0.000822	0.001183
77.906	0.000814	0.001183
77.955	0.000807	0.001183
78.004	0.000801	0.001183
78.053	0.000794	0.001183
78.101	0.000788	0.001184
78.15	0.000782	0.001184
78.199	0.000776	0.001184
78.248	0.000771	0.001185
78.296	0.000766	0.001185
78.345	0.000761	0.001186
78.394	0.000757	0.001187
78.443	0.000754	0.001187
78.492	0.000751	0.001188
78.54	0.000748	0.001188
78.589	0.000747	0.001189
78.638	0.000745	0.00119
78.687	0.000745	0.00119
78.735	0.000745	0.001191
78.784	0.000746	0.001192
78.833	0.000747	0.001192
78.882	0.000749	0.001193
78.93	0.000751	0.001193
78.979	0.000755	0.001194
79.028	0.000758	0.001194
79.077	0.000763	0.001195
79.125	0.000768	0.001195
79.174	0.000773	0.001195
79.223	0.000779	0.001196
79.272	0.000786	0.001196
79.321	0.000793	0.001196
79.369	0.0008	0.001196
79.418	0.000808	0.001196
79.467	0.000816	0.001196
79.516	0.000824	0.001196
79.564	0.000833	0.001196
79.613	0.000842	0.001195
79.662	0.000851	0.001195
79.711	0.000861	0.001194
79.759	0.00087	0.001194
79.808	0.00088	0.001193
79.857	0.00089	0.001192
79.906	0.0009	0.001192
79.954	0.00091	0.001191
80.003	0.000919	0.00119
80.052	0.000929	0.001189
80.101	0.000939	0.001188
80.15	0.000949	0.001187
80.198	0.000958	0.001186
80.247	0.000967	0.001185
80.296	0.000977	0.001184
80.345	0.000985	0.001183
80.393	0.000994	0.001182
80.442	0.001002	0.001181
80.491	0.00101	0.00118
80.54	0.001017	0.001178
80.588	0.001024	0.001177
80.637	0.00103	0.001176
80.686	0.001036	0.001175
80.735	0.001042	0.001173
80.783	0.001047	0.001172
80.832	0.001051	0.00117
80.881	0.001055	0.001169
80.93	0.001059	0.001168
80.979	0.001062	0.001166
81.027	0.001064	0.001165
81.076	0.001066	0.001163
81.125	0.001068	0.001162
81.174	0.001069	0.00116
81.222	0.00107	0.001159
81.271	0.00107	0.001157
81.32	0.00107	0.001156
81.369	0.001069	0.001154
81.417	0.001069	0.001153
81.466	0.001068	0.001151
81.515	0.001066	0.00115
81.564	0.001065	0.001148
81.612	0.001063	0.001147
81.661	0.001062	0.001146
81.71	0.00106	0.001145
81.759	0.001058	0.001144
81.808	0.001055	0.001143
81.856	0.001053	0.001142
81.905	0.001051	0.001141
81.954	0.001048	0.00114
82.003	0.001046	0.00114
82.051	0.001043	0.001139
82.1	0.001041	0.001139
82.149	0.001038	0.001139
82.198	0.001036	0.001139
82.246	0.001033	0.001139
82.295	0.00103	0.001139
82.344	0.001027	0.001139
82.393	0.001025	0.001139
82.441	0.001022	0.001139
82.49	0.001019	0.00114
82.539	0.001017	0.00114
82.588	0.001014	0.00114
82.637	0.001012	0.001141
82.685	0.00101	0.001141
82.734	0.001008	0.001142
82.783	0.001006	0.001142
82.832	0.001004	0.001143
82.88	0.001002	0.001143
82.929	0.001001	0.001143
82.978	0.001	0.001144
83.027	0.000999	0.001144
83.075	0.000999	0.001144
83.124	0.000998	0.001145
83.173	0.000998	0.001145
83.222	0.000998	0.001145
83.27	0.000999	0.001145
83.319	0.000999	0.001145
83.368	0.001	0.001145
83.417	0.001001	0.001146
83.466	0.001003	0.001146
83.514	0.001004	0.001146
83.563	0.001006	0.001146
83.612	0.001008	0.001146
83.661	0.00101	0.001146
83.709	0.001013	0.001146
83.758	0.001015	0.001146
83.807	0.001018	0.001147
83.856	0.001021	0.001147
83.904	0.001025	0.001147
83.953	0.001028	0.001147
84.002	0.001031	0.001147
84.051	0.001035	0.001148
84.099	0.001039	0.001148
84.148	0.001043	0.001149
84.197	0.001047	0.001149
84.246	0.001052	0.00115
84.295	0.001056	0.00115
84.343	0.001061	0.001151
84.392	0.001066	0.001151
84.441	0.001071	0.001152
84.49	0.001076	0.001153
84.538	0.001081	0.001154
84.587	0.001086	0.001154
84.636	0.001091	0.001155
84.685	0.001097	0.001156
84.733	0.001102	0.001157
84.782	0.001108	0.001158
84.831	0.001113	0.001159
84.88	0.001118	0.00116
84.928	0.001124	0.001161
84.977	0.001129	0.001161
85.026	0.001134	0.001162
85.075	0.001139	0.001163
85.124	0.001143	0.001164
85.172	0.001148	0.001165
85.221	0.001152	0.001165
85.27	0.001156	0.001166
85.319	0.00116	0.001167
85.367	0.001163	0.001167
85.416	0.001166	0.001168
85.465	0.001169	0.001168
85.514	0.001172	0.001169
85.562	0.001174	0.00117
85.611	0.001177	0.00117
85.66	0.001179	0.001171
85.709	0.00118	0.001171
85.757	0.001182	0.001172
85.806	0.001183	0.001172
85.855	0.001184	0.001173
85.904	0.001185	0.001174
85.953	0.001186	0.001174
86.001	0.001187	0.001175
86.05	0.001187	0.001176
86.099	0.001188	0.001176
86.148	0.001188	0.001177
86.196	0.001189	0.001178
86.245	0.001189	0.001179
86.294	0.001189	0.00118
86.343	0.001189	0.001181
86.391	0.001189	0.001182
86.44	0.00119	0.001183
86.489	0.00119	0.001184
86.538	0.00119	0.001185
86.586	0.00119	0.001186
86.635	0.00119	0.001188
86.684	0.00119	0.001189
86.733	0.001189	0.00119
86.782	0.001189	0.001191
86.83	0.001189	0.001193
86.879	0.001189	0.001194
86.928	0.001189	0.001195
86.977	0.001189	0.001197
87.025	0.001188	0.001198
87.074	0.001188	0.001199
87.123	0.001188	0.0012
87.172	0.001188	0.001202
87.22	0.001187	0.001203
87.269	0.001187	0.001204
87.318	0.001187	0.001205
87.367	0.001186	0.001206
87.415	0.001186	0.001208
87.464	0.001186	0.001209
87.513	0.001185	0.00121
87.562	0.001185	0.001211
87.611	0.001185	0.001213
87.659	0.001184	0.001214
87.708	0.001184	0.001215
87.757	0.001184	0.001216
87.806	0.001183	0.001217
87.854	0.001183	0.001219
87.903	0.001182	0.00122
87.952	0.001182	0.001221
88.001	0.001182	0.001222
88.049	0.001181	0.001223
88.098	0.001181	0.001225
88.147	0.00118	0.001226
88.196	0.00118	0.001227
88.244	0.001179	0.001228
88.293	0.001179	0.00123
88.342	0.001178	0.001231
88.391	0.001178	0.001232
88.44	0.001177	0.001233
88.488	0.001177	0.001235
88.537	0.001177	0.001236
88.586	0.001176	0.001237
88.635	0.001176	0.001239
88.683	0.001175	0.00124
88.732	0.001175	0.001241
88.781	0.001175	0.001242
88.83	0.001174	0.001244
88.878	0.001174	0.001245
88.927	0.001173	0.001246
88.976	0.001173	0.001248
89.025	0.001173	0.001249
89.073	0.001172	0.00125
89.122	0.001172	0.001252
89.171	0.001172	0.001253
89.22	0.001171	0.001255
89.269	0.001171	0.001256
89.317	0.001171	0.001257
89.366	0.001171	0.001259
89.415	0.00117	0.00126
89.464	0.00117	0.001261
89.512	0.00117	0.001263
89.561	0.00117	0.001264
89.61	0.001169	0.001265
89.659	0.001169	0.001267
89.707	0.001169	0.001268
89.756	0.001169	0.00127
89.805	0.001169	0.001271
89.854	0.001169	0.001272
89.902	0.001168	0.001274
89.951	0.001168	0.001275
90	0.001168	0.001276
15			0.001977	0.002354
15.018			0.001978	0.002354
15.035			0.001978	0.002354
15.053			0.001978	0.002354
15.07			0.001979	0.002355
15.088			0.001979	0.002355
15.106			0.001979	0.002355
15.123			0.00198	0.002355
15.141			0.00198	0.002355
15.159			0.00198	0.002355
15.176			0.001981	0.002355
15.194			0.001981	0.002356
15.211			0.001981	0.002356
15.229			0.001982	0.002356
15.247			0.001982	0.002356
15.264			0.001983	0.002356
15.282			0.001983	0.002356
15.299			0.001983	0.002357
15.317			0.001984	0.002357
15.335			0.001984	0.002357
15.352			0.001984	0.002357
15.37			0.001985	0.002357
15.387			0.001985	0.002357
15.405			0.001985	0.002358
15.423			0.001986	0.002358
15.44			0.001986	0.002358
15.458			0.001986	0.002358
15.476			0.001987	0.002358
15.493			0.001987	0.002358
15.511			0.001988	0.002359
15.528			0.001988	0.002359
15.546			0.001988	0.002359
15.564			0.001989	0.002359
15.581			0.001989	0.002359
15.599			0.001989	0.002359
15.616			0.00199	0.00236
15.634			0.00199	0.00236
15.652			0.00199	0.00236
15.669			0.001991	0.00236
15.687			0.001991	0.00236
15.704			0.001992	0.00236
15.722			0.001992	0.002361
15.74			0.001992	0.002361
15.757			0.001993	0.002361
15.775			0.001993	0.002361
15.793			0.001994	0.002361
15.81			0.001994	0.002361
15.828			0.001994	0.002362
15.845			0.001995	0.002362
15.863			0.001995	0.002362
15.881			0.001995	0.002362
15.898			0.001996	0.002362
15.916			0.001996	0.002362
15.933			0.001997	0.002363
15.951			0.001997	0.002363
15.969			0.001997	0.002363
15.986			0.001998	0.002363
16.004			0.001998	0.002363
16.021			0.001999	0.002363
16.039			0.001999	0.002364
16.057			0.001999	0.002364
16.074			0.002	0.002364
16.092			0.002	0.002364
16.11			0.002001	0.002364
16.127			0.002001	0.002364
16.145			0.002001	0.002365
16.162			0.002002	0.002365
16.18			0.002002	0.002365
16.198			0.002003	0.002365
16.215			0.002003	0.002365
16.233			0.002003	0.002365
16.25			0.002004	0.002366
16.268			0.002004	0.002366
16.286			0.002005	0.002366
16.303			0.002005	0.002366
16.321			0.002006	0.002366
16.338			0.002006	0.002366
16.356			0.002006	0.002367
16.374			0.002007	0.002367
16.391			0.002007	0.002367
16.409			0.002008	0.002367
16.427			0.002008	0.002367
16.444			0.002008	0.002367
16.462			0.002009	0.002368
16.479			0.002009	0.002368
16.497			0.00201	0.002368
16.515			0.00201	0.002368
16.532			0.00201	0.002368
16.55			0.002011	0.002368
16.567			0.002011	0.002368
16.585			0.002012	0.002368
16.603			0.002012	0.002369
16.62			0.002012	0.002369
16.638			0.002013	0.002369
16.655			0.002013	0.002369
16.673			0.002014	0.002369
16.691			0.002014	0.002369
16.708			0.002015	0.002369
16.726			0.002015	0.002369
16.744			0.002015	0.00237
16.761			0.002016	0.00237
16.779			0.002016	0.00237
16.796			0.002017	0.00237
16.814			0.002017	0.00237
16.832			0.002017	0.00237
16.849			0.002018	0.00237
16.867			0.002018	0.00237
16.884			0.002019	0.00237
16.902			0.002019	0.002371
16.92			0.00202	0.00237
16.937			0.00202	0.00237
16.955			0.002021	0.002369
16.972			0.002021	0.002369
16.99			0.002022	0.002368
17.008			0.002022	0.002368
17.025			0.002023	0.002367
17.043			0.002023	0.002367
17.061			0.002024	0.002366
17.078			0.002024	0.002365
17.096			0.002025	0.002365
17.113			0.002025	0.002364
17.131			0.002026	0.002363
17.149			0.002026	0.002362
17.166			0.002027	0.002361
17.184			0.002027	0.00236
17.201			0.002028	0.002359
17.219			0.002028	0.002358
17.237			0.002029	0.002357
17.254			0.002029	0.002356
17.272			0.002029	0.002355
17.289			0.00203	0.002354
17.307			0.00203	0.002352
17.325			0.00203	0.002351
17.342			0.002031	0.00235
17.36			0.002031	0.002348
17.378			0.002032	0.002347
17.395			0.002032	0.002346
17.413			0.002032	0.002344
17.43			0.002032	0.002343
17.448			0.002033	0.002341
17.466			0.002033	0.002339
17.483			0.002033	0.002338
17.501			0.002033	0.002336
17.518			0.002034	0.002335
17.536			0.002034	0.002333
17.554			0.002034	0.002331
17.571			0.002034	0.002329
17.589			0.002034	0.002328
17.606			0.002035	0.002326
17.624			0.002035	0.002324
17.642			0.002035	0.002322
17.659			0.002035	0.00232
17.677			0.002035	0.002318
17.695			0.002035	0.002316
17.712			0.002035	0.002315
17.73			0.002035	0.002313
17.747			0.002035	0.002311
17.765			0.002035	0.002309
17.783			0.002035	0.002307
17.8			0.002035	0.002305
17.818			0.002034	0.002303
17.835			0.002034	0.002301
17.853			0.002034	0.002299
17.871			0.002034	0.002296
17.888			0.002034	0.002294
17.906			0.002033	0.002292
17.923			0.002033	0.00229
17.941			0.002033	0.002288
17.959			0.002032	0.002286
17.976			0.002032	0.002284
17.994			0.002032	0.002282
18.012			0.002031	0.00228
18.029			0.002031	0.002278
18.047			0.00203	0.002276
18.064			0.00203	0.002274
18.082			0.002029	0.002272
18.1			0.002029	0.00227
18.117			0.002028	0.002268
18.135			0.002027	0.002266
18.152			0.002027	0.002264
18.17			0.002026	0.002262
18.188			0.002025	0.00226
18.205			0.002025	0.002258
18.223			0.002024	0.002256
18.24			0.002023	0.002254
18.258			0.002022	0.002252
18.276			0.002021	0.00225
18.293			0.00202	0.002248
18.311			0.002019	0.002246
18.329			0.002019	0.002245
18.346			0.002018	0.002243
18.364			0.002017	0.002241
18.381			0.002016	0.002239
18.399			0.002015	0.002237
18.417			0.002013	0.002235
18.434			0.002012	0.002234
18.452			0.002011	0.002232
18.469			0.00201	0.00223
18.487			0.002009	0.002229
18.505			0.002008	0.002227
18.522			0.002007	0.002225
18.54			0.002005	0.002223
18.557			0.002004	0.002222
18.575			0.002003	0.00222
18.593			0.002002	0.002219
18.61			0.002	0.002217
18.628			0.001999	0.002215
18.646			0.001998	0.002214
18.663			0.001996	0.002212
18.681			0.001995	0.002211
18.698			0.001994	0.002209
18.716			0.001992	0.002208
18.734			0.001991	0.002207
18.751			0.001989	0.002205
18.769			0.001988	0.002204
18.786			0.001986	0.002202
18.804			0.001985	0.002201
18.822			0.001983	0.0022
18.839			0.001982	0.002198
18.857			0.00198	0.002197
18.874			0.001979	0.002196
18.892			0.001977	0.002195
18.91			0.001975	0.002194
18.927			0.001974	0.002193
18.945			0.001972	0.002191
18.963			0.00197	0.00219
18.98			0.001969	0.002189
18.998			0.001967	0.002188
19.015			0.001965	0.002187
19.033			0.001964	0.002186
19.051			0.001962	0.002186
19.068			0.00196	0.002185
19.086			0.001958	0.002184
19.103			0.001957	0.002183
19.121			0.001955	0.002183
19.139			0.001953	0.002182
19.156			0.001951	0.002181
19.174			0.00195	0.002181
19.191			0.001948	0.00218
19.209			0.001946	0.00218
19.227			0.001945	0.002179
19.244			0.001943	0.002179
19.262			0.001941	0.002179
19.28			0.001939	0.002178
19.297			0.001938	0.002178
19.315			0.001936	0.002178
19.332			0.001934	0.002178
19.35			0.001933	0.002178
19.368			0.001931	0.002178
19.385			0.001929	0.002178
19.403			0.001927	0.002179
19.42			0.001926	0.002179
19.438			0.001924	0.002179
19.456			0.001922	0.00218
19.473			0.001921	0.00218
19.491			0.001919	0.002181
19.508			0.001918	0.002181
19.526			0.001916	0.002182
19.544			0.001914	0.002183
19.561			0.001913	0.002183
19.579			0.001911	0.002184
19.597			0.00191	0.002185
19.614			0.001908	0.002186
19.632			0.001907	0.002187
19.649			0.001906	0.002188
19.667			0.001904	0.00219
19.685			0.001903	0.002191
19.702			0.001901	0.002192
19.72			0.0019	0.002194
19.737			0.001899	0.002195
19.755			0.001897	0.002197
19.773			0.001896	0.002198
19.79			0.001895	0.0022
19.808			0.001894	0.002202
19.825			0.001893	0.002203
19.843			0.001891	0.002205
19.861			0.00189	0.002207
19.878			0.001889	0.002209
19.896			0.001888	0.002211
19.914			0.001887	0.002213
19.931			0.001886	0.002215
19.949			0.001886	0.002217
19.966			0.001885	0.002219
19.984			0.001884	0.002221
20.002			0.001883	0.002223
20.019			0.001882	0.002225
20.037			0.001882	0.002227
20.054			0.001881	0.00223
20.072			0.00188	0.002232
20.09			0.00188	0.002234
20.107			0.001879	0.002236
20.125			0.001878	0.002239
20.142			0.001878	0.002241
20.16			0.001878	0.002243
20.178			0.001877	0.002246
20.195			0.001877	0.002248
20.213			0.001876	0.00225
20.231			0.001876	0.002253
20.248			0.001876	0.002255
20.266			0.001876	0.002257
20.283			0.001876	0.00226
20.301			0.001875	0.002262
20.319			0.001875	0.002265
20.336			0.001875	0.002267
20.354			0.001875	0.002269
20.371			0.001875	0.002272
20.389			0.001875	0.002274
20.407			0.001875	0.002276
20.424			0.001875	0.002278
20.442			0.001876	0.002281
20.459			0.001876	0.002283
20.477			0.001876	0.002285
20.495			0.001876	0.002287
20.512			0.001877	0.002289
20.53			0.001877	0.002291
20.548			0.001877	0.002293
20.565			0.001878	0.002295
20.583			0.001878	0.002297
20.6			0.001878	0.002299
20.618			0.001879	0.002301
20.636			0.001879	0.002303
20.653			0.00188	0.002305
20.671			0.00188	0.002307
20.688			0.001881	0.002308
20.706			0.001881	0.00231
20.724			0.001882	0.002312
20.741			0.001882	0.002313
20.759			0.001883	0.002315
20.776			0.001883	0.002316
20.794			0.001884	0.002318
20.812			0.001884	0.002319
20.829			0.001885	0.00232
20.847			0.001886	0.002322
20.865			0.001886	0.002323
20.882			0.001887	0.002324
20.9			0.001887	0.002325
20.917			0.001888	0.002326
20.935			0.001889	0.002327
20.953			0.001889	0.002328
20.97			0.00189	0.002329
20.988			0.001891	0.00233
21.005			0.001891	0.002331
21.023			0.001892	0.002332
21.041			0.001893	0.002333
21.058			0.001893	0.002333
21.076			0.001894	0.002334
21.093			0.001894	0.002334
21.111			0.001895	0.002335
21.129			0.001896	0.002335
21.146			0.001896	0.002336
21.164			0.001897	0.002336
21.182			0.001897	0.002336
21.199			0.001898	0.002336
21.217			0.001899	0.002336
21.234			0.001899	0.002336
21.252			0.0019	0.002336
21.27			0.0019	0.002336
21.287			0.001901	0.002336
21.305			0.001901	0.002336
21.322			0.001902	0.002336
21.34			0.001902	0.002336
21.358			0.001903	0.002335
21.375			0.001903	0.002335
21.393			0.001903	0.002334
21.411			0.001904	0.002334
21.428			0.001904	0.002333
21.446			0.001904	0.002333
21.463			0.001905	0.002332
21.481			0.001905	0.002331
21.499			0.001905	0.00233
21.516			0.001906	0.00233
21.534			0.001906	0.002329
21.551			0.001906	0.002328
21.569			0.001906	0.002327
21.587			0.001907	0.002326
21.604			0.001907	0.002324
21.622			0.001907	0.002323
21.639			0.001907	0.002322
21.657			0.001907	0.002321
21.675			0.001907	0.002319
21.692			0.001907	0.002318
21.71			0.001907	0.002316
21.728			0.001907	0.002315
21.745			0.001907	0.002313
21.763			0.001907	0.002312
21.78			0.001907	0.00231
21.798			0.001907	0.002308
21.816			0.001907	0.002306
21.833			0.001907	0.002304
21.851			0.001906	0.002302
21.868			0.001906	0.0023
21.886			0.001906	0.002298
21.904			0.001906	0.002296
21.921			0.001905	0.002294
21.939			0.001905	0.002292
21.956			0.001904	0.00229
21.974			0.001904	0.002288
21.992			0.001903	0.002285
22.009			0.001903	0.002283
22.027			0.001902	0.00228
22.045			0.001902	0.002278
22.062			0.001901	0.002275
22.08			0.0019	0.002273
22.097			0.0019	0.00227
22.115			0.001899	0.002268
22.133			0.001898	0.002265
22.15			0.001897	0.002262
22.168			0.001896	0.00226
22.185			0.001895	0.002257
22.203			0.001894	0.002254
22.221			0.001893	0.002251
22.238			0.001892	0.002248
22.256			0.001891	0.002246
22.273			0.00189	0.002243
22.291			0.001888	0.00224
22.309			0.001887	0.002237
22.326			0.001886	0.002234
22.344			0.001884	0.002231
22.362			0.001883	0.002228
22.379			0.001881	0.002225
22.397			0.00188	0.002222
22.414			0.001878	0.002219
22.432			0.001877	0.002216
22.45			0.001875	0.002213
22.467			0.001873	0.00221
22.485			0.001872	0.002207
22.502			0.00187	0.002204
22.52			0.001868	0.002201
22.538			0.001866	0.002198
22.555			0.001865	0.002195
22.573			0.001863	0.002192
22.59			0.001861	0.002188
22.608			0.001859	0.002185
22.626			0.001857	0.002182
22.643			0.001855	0.002179
22.661			0.001853	0.002176
22.679			0.001851	0.002173
22.696			0.001848	0.00217
22.714			0.001846	0.002168
22.731			0.001844	0.002165
22.749			0.001842	0.002162
22.767			0.00184	0.002159
22.784			0.001837	0.002156
22.802			0.001835	0.002153
22.819			0.001833	0.00215
22.837			0.00183	0.002148
22.855			0.001828	0.002145
22.872			0.001826	0.002142
22.89			0.001823	0.002139
22.907			0.001821	0.002137
22.925			0.001818	0.002134
22.943			0.001816	0.002132
22.96			0.001813	0.002129
22.978			0.001811	0.002127
22.996			0.001809	0.002124
23.013			0.001806	0.002122
23.031			0.001803	0.00212
23.048			0.001801	0.002118
23.066			0.001798	0.002115
23.084			0.001796	0.002113
[truncated: 2,664 more rows]
