# Supplementary material for: Bipartite binding and partial inhibition links DEPTOR and mTOR in a mutually antagonistic embrace
Source: eLife. 2021 Sep 14;10:e68799. doi: 10.7554/eLife.68799 (PMC8439657; doi:10.7554/eLife.68799)
Supplement: Figure 6—figure supplement 1—source data 2. [file elife-68799-fig6-figsupp1-data2.xlsx]

## Sheet: Figure6-figS1
Figure 6-figure supplementary 1 A
	relative phosphorylation
[RHEB-GTP] (µM)	0 µM DEPTOR	25 µM DEPTOR
0	1	0.808803
0	0.830568	0.629643
30	1.08858	0.472461
60	1.51858	1.19453
60	1.61419	0.363708
122	3.28603	1.26705
244	4.56117	3.02725
366	6.05014	4.10913
488	6.50522	4.55945
610	5.57606	4.14637
610	6.33222	4.35206
Figure 6-figure supplementary 1 C
	relative phosphorylation
[PDZ] (µM)	4EBP1
0	1	1	1
0.0274348	0.998284	0.940012	1.07553
0.0823045	0.861161	0.989208	1.1157
0.246914	1.03595	1.14156	1.12321
0.740741	1.05086	1.37681	1.20978
2.22222	1.17543	1.39207	1.11907
6.66667	1.25383	1.24759	1.16922
20	1.13323	1.27276	1.21709
60	1.06696	1.40208	1.22753
