# Supplementary material for: Bipartite binding and partial inhibition links DEPTOR and mTOR in a mutually antagonistic embrace
Source: eLife. 2021 Sep 14;10:e68799. doi: 10.7554/eLife.68799 (PMC8439657; doi:10.7554/eLife.68799)
Supplement: Figure 6—source data 1. [file elife-68799-fig6-data1.xlsx]

## Sheet: Figure 6
Figure 6 A
	relative phosphorylation						relative phosphorylation
[DEPTOR]	180 µM RHEB					[DEPTOR]	20 µM RHEB						0 µM DEPTOR shown in:
50	0.58965					100	0.584478	0.552252	0.60589	0.60963	0.651798		Figure 1 A - 4EBP1
20	0.567425	0.684807	0.52706	0.52706		50	0.56062	0.577227	0.691228	0.626948	0.713872
6.25	0.541846	0.702485	0.525797	0.525797		20	0.601455	0.584463	0.679205	0.649346	0.782023
1.56	0.585725	0.691108	0.558828	0.558828		10	0.674118	0.603458	0.756132	0.739677	0.753963
0.31	0.52079	0.683185	0.538072	0.538072		3	0.794391	0.694575	0.821408	0.885918	0.731286
0.15	0.678827	0.710041	0.61241	0.61241		1.5		1	0.809178	0.842501
0.0624	0.606054	0.824207	0.65866	0.65866		0.5		0.991407	1	0.98141	0.879702
0.0312	0.759631	0.902503	0.736018	0.736018		0	1.02238		1.00396	1	0.942257
0.015	0.890344					0	0.977618				1.16431
0.0062	1.00453		0.903955	0.903955							1
0.003	0.964048		0.845209	0.845209
0	1	1	0.86244	1
0	1.03187		1.13756	0.86244
Figure 6 B
	relative phosphorylation
[DEPTOR]	mTORC1 A1459P
50	0.360498	0.361517	0.460112
25		0.388178	0.430565
6	0.350714	0.343909	0.375392
1.56	0.393191	0.408015	0.396161
0.31	0.486556	0.41962	0.444486
0.15	0.577019	0.457085	0.495935
0.0624	0.713326	0.59827	0.59146
0.0312	0.77514	0.731722	0.754163
0.015	0.777834	0.790219	0.879697
0	1.04266	1.02247	1
0	0.957338	0.977533	0.906768
