# Supplementary material for: Bipartite binding and partial inhibition links DEPTOR and mTOR in a mutually antagonistic embrace
Source: eLife. 2021 Sep 14;10:e68799. doi: 10.7554/eLife.68799 (PMC8439657; doi:10.7554/eLife.68799)
Supplement: Figure 7—source data 2. [file elife-68799-fig7-data2.xlsx]

## Sheet: Figure 7
Figure 7A
[DEPTOR] (µM)	relative phosphorylation		[Phospho-DEPTOR] (µM)	relative phosphorylation
replicate1			replicate1
15	0.632146		15	1.03636
5	0.650681		5	0.991085
0.555556	0.76013		0.555556	0.993069
0.185185	0.733715		0.185185	0.978709
0.0617284	0.899059		0.0617284	0.993635
0.0205761	0.959433		0.0205761	1.00611
0.00685871	1.04057		0.00685871	0.993893
replicate2			replicate2
20	0.64914		20	0.972422
10	0.58579		10	0.945142
1	0.675903		1	0.924971
0.2	0.827057		0.2	0.982136
0.1			0.1	1.07778
0.02	1.02424		0.02	1.12794
0	1		0	1
replicate3			replicate3
15	0.5		15	0.98786
1.6	0.571188		1.6	1.07189
0.555556	0.68172		0.555556	1.11446
0.185185	0.76524		0.185185	1.03459
0.0617284	0.915561		0.0617284	1.11243
0.0205761	1.01456		0.0205761	1.01374
0.00685871	0.985441		0.00685871	0.986257
