# Supplementary material for: Bipartite binding and partial inhibition links DEPTOR and mTOR in a mutually antagonistic embrace
Source: eLife. 2021 Sep 14;10:e68799. doi: 10.7554/eLife.68799 (PMC8439657; doi:10.7554/eLife.68799)
Supplement: Supplementary file 1. [file elife-68799-supp1.xlsx]

## Sheet: Meta Data Analysis
Supplementary File 1
Data Set	DEPTOR 0.3 s Global Exchange
Number of Peptides	179
Coverage	94.9
Redundancy	7.23
Deuterium time course analyzed	0.3 s

## Sheet: DEPTOR
					Color scale
					0	0.35	0.7
								STDEVS
			Max Frac Deut		0.74		a
Start	End	Sequence	Mod	MHP	#D	RT	0.005	0.005
2	27	EEGGSTGSAGSDSSTSGSGGAQQREL		2399.02	25	5.72896	0.601686	0.0392865
2	30	EEGGSTGSAGSDSSTSGSGGAQQRELERM		2815.2	28	6.82728	0.625366	0.00350753
3	32	EGGSTGSAGSDSSTSGSGGAQQRELERMAE		2886.24	29	7.35546	0.567057	0.0478533
14	30	SSTSGSGGAQQRELERM		1780.82	16	6.58981	0.619806	0.00754899
14	32	SSTSGSGGAQQRELERMAE		1980.9	18	7.1728	0.612202	0.0075735
24	32	QRELERMAE		1161.57	8	5.81163	0.524437	0.0282667
33	39	VLVTGEQ		745.409	6	5.85654	0.194607	0.00646059
33	40	VLVTGEQL		858.493	7	8.45311	0.180593	0.0122556
40	46	LRLRLHE		936.574	6	6.38634	0.051327	0.00335608
40	64	LRLRLHEEKVIKDRRHHLKTYPNCF		3201.77	23	6.59393	0.0923343	0.00561563
43	64	RLHEEKVIKDRRHHLKTYPNCF		2819.5	20	5.79972	0.100697	0.0193474
45	63	HEEKVIKDRRHHLKTYPNC		2403.25	17	4.37155	0.111585	0.00328362
45	64	HEEKVIKDRRHHLKTYPNCF		2550.31	18	5.68365	0.096458	0.00754775
47	64	EKVIKDRRHHLKTYPNCF		2284.21	16	5.862	0.102097	0.019649
64	72	FVAKELIDW		1120.6	8	11.2394	0.0473459	0.00980321
64	73	FVAKELIDWL		1233.69	9	12.5382	0.0469968	0.00520946
65	72	VAKELIDW		973.535	7	10.3447	0.0404651	0.00397394
65	85	VAKELIDWLIEHKEASDRETA		2453.27	20	9.7211	0.0741326	0.00221574
67	73	KELIDWL		916.514	6	11.8419	0.0297315	0.0234056
69	85	LIDWLIEHKEASDRETA		2026.02	16	9.11503	0.0844408	0.00799882
73	81	LIEHKEASD		1041.52	8	4.10976	0.120912	0.0109765
73	85	LIEHKEASDRETA		1498.75	12	4.25086	0.133452	0.00756115
74	81	IEHKEASD		928.437	7	3.55574	0.12868	0.00791737
74	85	IEHKEASDRETA		1385.67	11	3.86583	0.142067	0.012385
75	85	EHKEASDRETA		1272.58	10	3.86641	0.146264	0.00307216
86	104	IKLMQKLADRGIIHHVCDE		2219.18	18	7.80177	0.0484302	0.00572635
86	113	IKLMQKLADRGIIHHVCDEHKEFKDVKL		3343.81	27	7.99872	0.131325	0.027542
89	104	MQKLADRGIIHHVCDE		1864.92	15	6.87141	0.085251	0.00251721
89	110	MQKLADRGIIHHVCDEHKEFKD		2649.3	21	6.55523	0.110107	0.0120531
90	104	QKLADRGIIHHVCDE		1733.88	14	6.86889	0.0655909	0.00636255
95	104	RGIIHHVCDE		1178.57	9	5.23272	0.103745	0.00441907
95	113	RGIIHHVCDEHKEFKDVKL		2303.21	18	6.6135	0.181269	0.00775315
105	112	HKEFKDVK		1030.57	7	6.04932	0.158729	0.0149541
105	113	HKEFKDVKL		1143.65	8	6.04663	0.376459	0.00660034
114	124	FYRFRKDDGTF		1451.71	10	7.78582	0.261482	0.00311986
114	129	FYRFRKDDGTFPLDNE		2019.96	14	8.59651	0.333145	0.00522577
114	132	FYRFRKDDGTFPLDNEVKA		2318.16	17	8.30003	0.328856	0.00692949
114	139	FYRFRKDDGTFPLDNEVKAFMRGQRL		3206.63	24	10.619	0.212281	0.0100286
118	129	RKDDGTFPLDNE		1406.65	10	7.57521	0.450603	0.00252608
125	132	PLDNEVKA		885.468	6	5.9297	0.467584	0.00547838
130	139	VKAFMRGQRL		1205.69	9	6.42946	0.0846375	0.00857222
133	139	FMRGQRL		907.493	6	6.15653	0.04423	0.00316914
140	148	YEKLMSPEN		1110.51	7	6.7577	0.194593	0.00535193
140	151	YEKLMSPENTLL		1437.73	10	9.9112	0.238028	0.00354784
140	152	YEKLMSPENTLLQ		1565.79	11	9.30975	0.206711	0.00989619
140	155	YEKLMSPENTLLQPRE		1947.98	13	8.75569	0.209325	0.00514969
140	157	YEKLMSPENTLLQPREEE		2206.07	15	8.79676	0.211449	0.00373189
140	158	YEKLMSPENTLLQPREEEG		2263.09	16	8.75772	0.228163	0.00304983
140	161	YEKLMSPENTLLQPREEEGVKY		2653.32	19	8.92895	0.224199	0.0035389
140	164	YEKLMSPENTLLQPREEEGVKYERT		3039.51	22	8.10503	0.207126	0.00448931
140	165	YEKLMSPENTLLQPREEEGVKYERTF		3186.58	23	8.8626	0.186939	0.0060517
140	166	YEKLMSPENTLLQPREEEGVKYERTFM		3317.62	24	9.36805	0.186958	0.00427461
142	161	KLMSPENTLLQPREEEGVKY		2361.21	17	8.53881	0.246663	0.00186161
144	157	MSPENTLLQPREEE		1672.78	11	8.24616	0.310893	0.0380574
144	161	MSPENTLLQPREEEGVKY		2120.03	15	8.68258	0.294494	0.00489703
148	161	NTLLQPREEEGVKY		1675.87	12	8.92924	0.252187	0.00471712
149	155	TLLQPRE		856.489	5	6.7126	0.0750735	0.0399119
149	158	TLLQPREEEG		1171.6	8	6.79578	0.224464	0.0124196
149	161	TLLQPREEEGVKY		1561.82	11	7.61036	0.190313	0.00338956
149	165	TLLQPREEEGVKYERTF		2095.08	15	7.88828	0.177752	0.00856721
149	166	TLLQPREEEGVKYERTFM		2226.12	16	8.65013	0.162028	0.0039859
151	161	LQPREEEGVKY		1347.69	9	7.60947	0.182153	0.00943468
151	165	LQPREEEGVKYERTF		1880.95	13	7.88932	0.163258	0.0295448
152	161	QPREEEGVKY		1234.61	8	5.72787	0.2482	0.00651689
152	165	QPREEEGVKYERTF		1767.87	12	6.55948	0.197146	0.0163679
152	166	QPREEEGVKYERTFM		1898.91	13	7.58526	0.179677	0.00741383
171	189	LDWLVQEGEATTRKEAEQL		2216.12	18	10.423	0.165679	0.0111058
171	190	LDWLVQEGEATTRKEAEQLC		2319.13	19	10.7695	0.146398	0.0321735
171	193	LDWLVQEGEATTRKEAEQLCHRL		2725.37	22	11.0091	0.123526	0.00162162
171	195	LDWLVQEGEATTRKEAEQLCHRLME		2985.46	24	11.6665	0.132687	0.0100101
174	188	LVQEGEATTRKEAEQ		1688.85	14	4.87691	0.212684	0.00389373
174	200	LVQEGEATTRKEAEQLCHRLMEHGIIQ		3119.57	26	10.0301	0.112215	0.00474823
175	188	VQEGEATTRKEAEQ		1575.76	13	4.25286	0.222329	0.00305894
175	189	VQEGEATTRKEAEQL		1688.85	14	6.15343	0.206306	0.00183002
175	190	VQEGEATTRKEAEQLC		1791.85	15	6.8564	0.196583	0.00288477
175	193	VQEGEATTRKEAEQLCHRL		2198.1	18	8.08591	0.148067	0.0105853
175	195	VQEGEATTRKEAEQLCHRLME		2458.18	20	9.26065	0.133222	0.00210757
175	200	VQEGEATTRKEAEQLCHRLMEHGIIQ		3006.49	25	9.7888	0.106454	0.0018667
177	189	EGEATTRKEAEQL		1461.72	12	5.80656	0.216779	0.0033857
181	195	TTRKEAEQLCHRLME		1844.91	14	8.07402	0.0915104	0.00661168
189	213	LCHRLMEHGIIQHVSSKHPFVDSNL		2897.47	23	7.63166	0.0997983	0.0105076
189	214	LCHRLMEHGIIQHVSSKHPFVDSNLL		3010.55	24	8.31104	0.0816028	0.00891976
190	200	CHRLMEHGIIQ		1336.66	10	6.51994	0.0295953	0.0134176
190	213	CHRLMEHGIIQHVSSKHPFVDSNL		2784.38	22	7.40616	0.0900927	0.00681149
190	214	CHRLMEHGIIQHVSSKHPFVDSNLL		2897.47	23	8.12325	0.0824992	0.00539189
191	213	HRLMEHGIIQHVSSKHPFVDSNL		2681.37	21	7.30424	0.108244	0.00687149
195	208	EHGIIQHVSSKHPF		1615.83	12	8.59581	0.242237	0.00958401
196	213	HGIIQHVSSKHPFVDSNL		2015.05	16	7.17155	0.142142	0.00598378
196	214	HGIIQHVSSKHPFVDSNLL		2128.13	17	8.19406	0.122519	0.00449754
201	213	HVSSKHPFVDSNL		1466.74	11	6.90537	0.177849	0.0123195
201	214	HVSSKHPFVDSNLL		1579.82	12	8.29069	0.137102	0.00914324
215	221	YQFRMNF		1005.46	6	10.4702	0.460235	0.00782838
230	248	LLNEKSPSSQETHDSPFCL		2132	16	9.75896	0.466617	0.00471334
231	238	LNEKSPSS		861.431	6	4.22728	0.687421	0.0199642
231	248	LNEKSPSSQETHDSPFCL		2018.91	15	9.46712	0.4777	0.00260766
232	247	NEKSPSSQETHDSPFC		1792.74	13	7.14631	0.442568	0.00881798
232	248	NEKSPSSQETHDSPFCL		1905.83	14	9.39302	0.462949	0.000886004
232	261	NEKSPSSQETHDSPFCLRKQSHDNRKSTSF		3477.62	27	6.10805	0.321615	0.00540265
239	248	QETHDSPFCL		1176.5	8	10.1772	0.424663	0.00681791
240	248	ETHDSPFCL		1048.44	7	10.2362	0.419612	0.0228174
248	261	LRKQSHDNRKSTSF		1703.89	13	4.07376	0.342829	0.00670052
249	261	RKQSHDNRKSTSF		1590.81	12	3.93944	0.337923	0.0071705
262	269	MSVSPSKE		864.413	6	4.96073	0.713793	0.0038241
262	274	MSVSPSKEIKIVS		1404.78	11	7.32573	0.766641	0.00475835
262	275	MSVSPSKEIKIVSA		1475.81	12	7.5197	0.755036	0.00660113
263	269	SVSPSKE		733.373	5	4.96096	0.733897	0.00680297
263	275	SVSPSKEIKIVSA		1344.77	11	7.51532	0.780865	0.00390455
264	275	VSPSKEIKIVSA		1257.74	10	7.51994	0.700185	0.0166345
276	288	VRRSSMSSCGSSG		1300.57	12	4.28509	0.486143	0.0115151
276	289	VRRSSMSSCGSSGY		1463.64	13	5.51239	0.468431	0.00350052
276	290	VRRSSMSSCGSSGYF		1610.7	14	7.91448	0.466948	0.0104403
282	289	SSCGSSGY		747.261	7	5.42681	0.528486	0.0024944
282	290	SSCGSSGYF		894.33	8	8.94963	0.502334	0.00357111
289	296	YFSSSPTL		901.43	6	8.94283	0.651	0.00391104
289	303	YFSSSPTLSSSPPVL		1568.78	11	9.95346	0.625124	0.014865
289	317	YFSSSPTLSSSPPVLCNPKSVLKRPVTSE		3107.61	23	8.59738	0.685574	0.00485482
289	318	YFSSSPTLSSSPPVLCNPKSVLKRPVTSEE		3236.65	24	8.60296	0.634677	0.00304274
290	296	FSSSPTL		738.367	5	7.92767	0.677905	0.00521378
290	303	FSSSPTLSSSPPVL		1405.72	10	9.32115	0.674447	0.0225624
290	317	FSSSPTLSSSPPVLCNPKSVLKRPVTSE		2944.54	22	8.26753	0.673687	0.0104412
290	318	FSSSPTLSSSPPVLCNPKSVLKRPVTSEE		3073.59	23	8.28196	0.653603	0.00353132
291	318	SSSPTLSSSPPVLCNPKSVLKRPVTSEE		2926.52	22	7.9899	0.698536	0.0125049
294	318	PTLSSSPPVLCNPKSVLKRPVTSEE		2665.42	19	7.98069	0.682713	0.0122896
297	303	SSSPPVL		686.372	4	7.58121	0.72366	0.00390372
297	310	SSSPPVLCNPKSVL		1427.76	10	9.09005	0.801408	0.0157136
297	317	SSSPPVLCNPKSVLKRPVTSE		2225.2	16	7.41562	0.713461	0.0109351
297	318	SSSPPVLCNPKSVLKRPVTSEE		2354.24	17	7.44571	0.655546	0.00469706
297	319	SSSPPVLCNPKSVLKRPVTSEEL		2467.32	18	8.303	0.60868	0.00569002
300	318	PPVLCNPKSVLKRPVTSEE		2093.14	14	7.4455	0.68919	0.00797568
304	317	CNPKSVLKRPVTSE		1557.84	11	5.44001	0.646937	0.0132654
304	318	CNPKSVLKRPVTSEE		1686.88	12	5.55012	0.615718	0.0141347
304	319	CNPKSVLKRPVTSEEL		1799.97	13	6.87484	0.516957	0.0184943
306	318	PKSVLKRPVTSEE		1469.83	10	5.55373	0.421113	0.00733432
318	331	ELLTPGAPYARKTF		1563.85	11	8.30731	0.182423	0.00391806
318	332	ELLTPGAPYARKTFT		1664.9	12	8.11285	0.176639	0.00743705
318	335	ELLTPGAPYARKTFTIVG		1934.07	15	9.34153	0.160231	0.00489613
318	341	ELLTPGAPYARKTFTIVGDAVGWG		2519.33	21	11.3199	0.258454	0.00994485
319	331	LLTPGAPYARKTF		1434.81	10	7.80394	0.203128	0.00726257
319	335	LLTPGAPYARKTFTIVG		1805.03	14	8.99602	0.165201	0.00543224
319	337	LLTPGAPYARKTFTIVGDA		1991.1	16	9.14939	0.187791	0.00545524
319	341	LLTPGAPYARKTFTIVGDAVGWG		2390.29	20	11.1056	0.281714	0.00744791
320	331	LTPGAPYARKTF		1321.73	9	6.93333	0.189363	0.0174926
320	332	LTPGAPYARKTFT		1422.77	10	6.77211	0.219764	0.00857662
320	335	LTPGAPYARKTFTIVG		1691.95	13	8.40975	0.173083	0.00510613
320	341	LTPGAPYARKTFTIVGDAVGWG		2277.2	19	10.7314	0.286389	0.0140593
321	331	TPGAPYARKTF		1208.64	8	7.62402	0.183062	0.00501267
321	332	TPGAPYARKTFT		1309.69	9	7.62984	0.210473	0.00621201
321	335	TPGAPYARKTFTIVG		1578.86	12	8.99593	0.175696	0.0116885
322	331	PGAPYARKTF		1107.59	7	7.81182	0.129127	0.00780154
322	332	PGAPYARKTFT		1208.64	8	7.80463	0.213752	0.0106235
322	335	PGAPYARKTFTIVG		1477.82	11	8.99669	0.174331	0.00804091
332	341	TIVGDAVGWG		974.494	9	10.1899	0.397182	0.0102976
332	342	TIVGDAVGWGF		1121.56	10	12.3221	0.308373	0.029915
333	341	IVGDAVGWG		873.447	8	9.54371	0.408462	0.00623885
333	342	IVGDAVGWGF		1020.51	9	12.0752	0.378391	0.00913273
342	365	FVVRGSKPCHIQAVDPSGPAAAAG		2335.2	20	6.60744	0.159605	0.00899993
342	366	FVVRGSKPCHIQAVDPSGPAAAAGM		2466.24	21	7.55375	0.153705	0.00547149
343	365	VVRGSKPCHIQAVDPSGPAAAAG		2188.13	19	5.74511	0.172437	0.0157175
343	366	VVRGSKPCHIQAVDPSGPAAAAGM		2319.17	20	6.99547	0.169536	0.00498054
343	370	VVRGSKPCHIQAVDPSGPAAAAGMKVCQ		2777.4	24	7.03439	0.133206	0.00796267
371	378	FVVSVNGL		834.472	7	10.2395	0.106896	0.00564537
371	385	FVVSVNGLNVLHVDY		1674.88	14	11.3332	0.101472	0.00195656
371	391	FVVSVNGLNVLHVDYRTVNNL		2372.27	20	10.8564	0.110752	0.0071173
372	378	VVSVNGL		687.404	6	8.2399	0.138521	0.00348829
372	381	VVSVNGLNVL		1013.6	9	10.2789	0.180138	0.0103026
372	385	VVSVNGLNVLHVDY		1527.82	13	10.3223	0.138145	0.00403212
379	385	NVLHVDY		859.431	6	8.1727	0.0931563	0.00449122
379	391	NVLHVDYRTVNNL		1556.82	12	8.46615	0.0758429	0.0124214
381	397	LHVDYRTVNNLILTGPR		1981.1	15	7.6089	0.318314	0.0310647
382	391	HVDYRTVNNL		1230.62	9	6.948	0.078635	0.00410676
386	393	RTVNNLIL		942.573	7	9.14413	0.0168413	0.00408764
391	398	LILTGPRT		870.541	6	7.2454	0.285662	0.0063205
391	400	LILTGPRTIV		1082.69	8	9.05932	0.208945	0.0102042
391	401	LILTGPRTIVM		1213.73	9	9.79303	0.182508	0.00407643
391	402	LILTGPRTIVME		1342.78	10	9.45753	0.161326	0.0130128
392	400	ILTGPRTIV		969.609	7	7.89032	0.224448	0.00448958
392	402	ILTGPRTIVME		1229.69	9	8.44906	0.170137	0.00358874
393	401	LTGPRTIVM		987.566	7	9.79191	0.190075	0.0199025
394	401	TGPRTIVM		874.481	6	8.80025	0.217144	0.00930473

## Sheet: DEPTOR Raw Data
Protein	Start	End	Sequence	Modification	Fragment	MaxUptake	MHP	State	Exposure	Center	Center SD	Uptake	Uptake SD	RT	RT SD
DEPTOR	2	27	EEGGSTGSAGSDSSTSGSGGAQQREL			25	2399.02	Default State	0	2400.25	0.038314	0	0	5.7416	0.002168
DEPTOR	2	27	EEGGSTGSAGSDSSTSGSGGAQQREL			25	2399.02	Default State	0.005	2411.38	0.72579	11.1312	0.726801	5.72896	0.001504
DEPTOR	2	30	EEGGSTGSAGSDSSTSGSGGAQQRELERM			28	2815.2	Default State	0	2816.73	0.057217	0	0	6.86591	0.003614
DEPTOR	2	30	EEGGSTGSAGSDSSTSGSGGAQQRELERM			28	2815.2	Default State	0.005	2829.69	0.044811	12.9576	0.072676	6.82728	0.002344
DEPTOR	3	32	EGGSTGSAGSDSSTSGSGGAQQRELERMAE			29	2886.24	Default State	0	2887.93	0.01733	0	0	7.40169	0.001276
DEPTOR	3	32	EGGSTGSAGSDSSTSGSGGAQQRELERMAE			29	2886.24	Default State	0.005	2900.1	1.02678	12.169	1.02693	7.35546	0.004168
DEPTOR	14	30	SSTSGSGGAQQRELERM			16	1780.82	Default State	0	1781.99	0.03535	0	0	6.62708	0.002995
DEPTOR	14	30	SSTSGSGGAQQRELERM			16	1780.82	Default State	0.005	1789.33	0.082092	7.33851	0.08938	6.58981	0.001664
DEPTOR	14	32	SSTSGSGGAQQRELERMAE			18	1980.9	Default State	0	1982.06	0.019605	0	0	7.22143	0.002893
DEPTOR	14	32	SSTSGSGGAQQRELERMAE			18	1980.9	Default State	0.005	1990.22	0.098955	8.15454	0.100879	7.1728	0.00116
DEPTOR	24	32	QRELERMAE			8	1161.57	Default State	0	1162.46	0.025194	0	0	5.83016	0.001346
DEPTOR	24	32	QRELERMAE			8	1161.57	Default State	0.005	1165.57	0.165432	3.10466	0.167339	5.81163	0.00174
DEPTOR	33	39	VLVTGEQ			6	745.409	Default State	0	745.711	0.002143	0	0	5.86049	0.002336
DEPTOR	33	39	VLVTGEQ			6	745.409	Default State	0.005	746.575	0.028605	0.864056	0.028685	5.85654	0.001695
DEPTOR	33	40	VLVTGEQL			7	858.493	Default State	0	858.884	0.038163	0	0	8.45923	0.003139
DEPTOR	33	40	VLVTGEQL			7	858.493	Default State	0.005	859.819	0.050733	0.93547	0.063484	8.45311	0.001752
DEPTOR	40	46	LRLRLHE			6	936.574	Default State	0	937.074	0.005058	0	0	6.3878	0.002085
DEPTOR	40	46	LRLRLHE			6	936.574	Default State	0.005	937.302	0.014016	0.227892	0.014901	6.38634	0.001397
DEPTOR	40	64	LRLRLHEEKVIKDRRHHLKTYPNCF			23	3201.77	Default State	0	3203.61	0.039039	0	0	6.58038	0.012626
DEPTOR	40	64	LRLRLHEEKVIKDRRHHLKTYPNCF			23	3201.77	Default State	0.005	3205.18	0.087242	1.57153	0.095578	6.59393	0.011094
DEPTOR	43	64	RLHEEKVIKDRRHHLKTYPNCF			20	2819.5	Default State	0	2821.17	0.226275	0	0	5.79847	0.010178
DEPTOR	43	64	RLHEEKVIKDRRHHLKTYPNCF			20	2819.5	Default State	0.005	2822.66	0.175474	1.49031	0.286342	5.79972	0.011574
DEPTOR	45	63	HEEKVIKDRRHHLKTYPNC			17	2403.25	Default State	0	2404.67	0.017592	0	0	4.37126	0.003426
DEPTOR	45	63	HEEKVIKDRRHHLKTYPNC			17	2403.25	Default State	0.005	2406.07	0.037374	1.40374	0.041308	4.37155	0.005628
DEPTOR	45	64	HEEKVIKDRRHHLKTYPNCF			18	2550.31	Default State	0	2551.84	0.01413	0	0	5.68685	0.004092
DEPTOR	45	64	HEEKVIKDRRHHLKTYPNCF			18	2550.31	Default State	0.005	2553.12	0.099538	1.28482	0.100536	5.68365	0.004644
DEPTOR	47	64	EKVIKDRRHHLKTYPNCF			16	2284.21	Default State	0	2285.44	0.05783	0	0	5.86304	0.004199
DEPTOR	47	64	EKVIKDRRHHLKTYPNCF			16	2284.21	Default State	0.005	2286.65	0.225342	1.20882	0.232644	5.862	0.005392
DEPTOR	64	72	FVAKELIDW			8	1120.6	Default State	0	1121.29	0.025006	0	0	11.2411	0.003182
DEPTOR	64	72	FVAKELIDW			8	1120.6	Default State	0.005	1121.57	0.052371	0.280288	0.058035	11.2394	0.002234
DEPTOR	64	73	FVAKELIDWL			9	1233.69	Default State	0	1234.41	0.014793	0	0	12.5413	0.004611
DEPTOR	64	73	FVAKELIDWL			9	1233.69	Default State	0.005	1234.72	0.031383	0.312999	0.034695	12.5382	0.005679
DEPTOR	65	72	VAKELIDW			7	973.535	Default State	0	974.059	0.009161	0	0	10.3466	0.003325
DEPTOR	65	72	VAKELIDW			7	973.535	Default State	0.005	974.269	0.018434	0.209609	0.020585	10.3447	0.001426
DEPTOR	65	85	VAKELIDWLIEHKEASDRETA			20	2453.27	Default State	0	2454.63	0.02065	0	0	9.71071	0.007212
DEPTOR	65	85	VAKELIDWLIEHKEASDRETA			20	2453.27	Default State	0.005	2455.73	0.025475	1.09716	0.032793	9.7211	0.005364
DEPTOR	67	73	KELIDWL			6	916.514	Default State	0	917.103	0.065864	0	0	11.8464	0.003737
DEPTOR	67	73	KELIDWL			6	916.514	Default State	0.005	917.235	0.080384	0.132008	0.103921	11.8419	0.003614
DEPTOR	69	85	LIDWLIEHKEASDRETA			16	2026.02	Default State	0	2027.49	0.053528	0	0	9.11189	0.006358
DEPTOR	69	85	LIDWLIEHKEASDRETA			16	2026.02	Default State	0.005	2028.49	0.078128	0.999779	0.094706	9.11503	0.003275
DEPTOR	73	81	LIEHKEASD			8	1041.52	Default State	0	1042.11	0.037301	0	0	4.11293	0.002354
DEPTOR	73	81	LIEHKEASD			8	1041.52	Default State	0.005	1042.83	0.053209	0.715798	0.064981	4.10976	0.001595
DEPTOR	73	85	LIEHKEASDRETA			12	1498.75	Default State	0	1499.59	0.019189	0	0	4.25364	0.002024
DEPTOR	73	85	LIEHKEASDRETA			12	1498.75	Default State	0.005	1500.77	0.064343	1.18505	0.067143	4.25086	0.00169
DEPTOR	74	81	IEHKEASD			7	928.437	Default State	0	928.934	0.016671	0	0	3.55321	0.008278
DEPTOR	74	81	IEHKEASD			7	928.437	Default State	0.005	929.6	0.037471	0.666563	0.041012	3.55574	0.008067
DEPTOR	74	85	IEHKEASDRETA			11	1385.67	Default State	0	1386.37	0.013897	0	0	3.86825	0.003137
DEPTOR	74	85	IEHKEASDRETA			11	1385.67	Default State	0.005	1387.53	0.099851	1.15643	0.100814	3.86583	0.001303
DEPTOR	75	85	EHKEASDRETA			10	1272.58	Default State	0	1273.29	0.015289	0	0	3.86984	0.003211
DEPTOR	75	85	EHKEASDRETA			10	1272.58	Default State	0.005	1274.37	0.016825	1.08235	0.022734	3.86641	0.001627
DEPTOR	86	104	IKLMQKLADRGIIHHVCDE			18	2219.18	Default State	0	2220.65	0.059243	0	0	7.80968	0.004878
DEPTOR	86	104	IKLMQKLADRGIIHHVCDE			18	2219.18	Default State	0.005	2221.3	0.048044	0.64509	0.076275	7.80177	0.003162
DEPTOR	86	113	IKLMQKLADRGIIHHVCDEHKEFKDVKL			27	3343.81	Default State	0	3345.86	0.120021	0	0	8.00601	0.007359
DEPTOR	86	113	IKLMQKLADRGIIHHVCDEHKEFKDVKL			27	3343.81	Default State	0.005	3348.49	0.537041	2.62387	0.55029	7.99872	0.004532
DEPTOR	89	104	MQKLADRGIIHHVCDE			15	1864.92	Default State	0	1866.04	0.008874	0	0	6.87847	0.00309
DEPTOR	89	104	MQKLADRGIIHHVCDE			15	1864.92	Default State	0.005	1866.98	0.026494	0.946286	0.027941	6.87141	0.002432
DEPTOR	89	110	MQKLADRGIIHHVCDEHKEFKD			21	2649.3	Default State	0	2651.01	0.05338	0	0	6.55797	0.005552
DEPTOR	89	110	MQKLADRGIIHHVCDEHKEFKD			21	2649.3	Default State	0.005	2652.72	0.179538	1.71107	0.187305	6.55523	0.00485
DEPTOR	90	104	QKLADRGIIHHVCDE			14	1733.88	Default State	0	1735.14	0.010478	0	0	6.87677	0.002883
DEPTOR	90	104	QKLADRGIIHHVCDE			14	1733.88	Default State	0.005	1735.82	0.065078	0.679522	0.065916	6.86889	0.000205
DEPTOR	95	104	RGIIHHVCDE			9	1178.57	Default State	0	1179.3	0.01466	0	0	5.2334	0.00209
DEPTOR	95	104	RGIIHHVCDE			9	1178.57	Default State	0.005	1179.99	0.02552	0.690939	0.029431	5.23272	0.004341
DEPTOR	95	113	RGIIHHVCDEHKEFKDVKL			18	2303.21	Default State	0	2304.65	0.086375	0	0	6.62807	0.038246
DEPTOR	95	113	RGIIHHVCDEHKEFKDVKL			18	2303.21	Default State	0.005	2307.06	0.056609	2.41451	0.103272	6.6135	0.005764
DEPTOR	105	112	HKEFKDVK			7	1030.57	Default State	0	1031.01	0.065258	0	0	6.05607	0.000519
DEPTOR	105	112	HKEFKDVK			7	1030.57	Default State	0.005	1031.83	0.041734	0.822217	0.077462	6.04932	0.001975
DEPTOR	105	113	HKEFKDVKL			8	1143.65	Default State	0	1144.24	0.007737	0	0	6.05452	0.002583
DEPTOR	105	113	HKEFKDVKL			8	1143.65	Default State	0.005	1146.47	0.0383	2.22864	0.039074	6.04663	0.001953
DEPTOR	114	124	FYRFRKDDGTF			10	1451.71	Default State	0	1452.53	0.014776	0	0	7.78994	0.00237
DEPTOR	114	124	FYRFRKDDGTF			10	1451.71	Default State	0.005	1454.46	0.017739	1.93497	0.023087	7.78582	0.001736
DEPTOR	114	129	FYRFRKDDGTFPLDNE			14	2019.96	Default State	0	2021.09	0.033059	0	0	8.60729	0.003437
DEPTOR	114	129	FYRFRKDDGTFPLDNE			14	2019.96	Default State	0.005	2024.54	0.042874	3.45138	0.054139	8.59651	0.0022
DEPTOR	114	132	FYRFRKDDGTFPLDNEVKA			17	2318.16	Default State	0	2319.52	0.046554	0	0	8.30748	0.004628
DEPTOR	114	132	FYRFRKDDGTFPLDNEVKA			17	2318.16	Default State	0.005	2323.66	0.073702	4.13701	0.087173	8.30003	0.00412
DEPTOR	114	139	FYRFRKDDGTFPLDNEVKAFMRGQRL			24	3206.63	Default State	0	3208.6	0.102538	0	0	10.6264	0.004584
DEPTOR	114	139	FYRFRKDDGTFPLDNEVKAFMRGQRL			24	3206.63	Default State	0.005	3212.37	0.145632	3.7701	0.178108	10.619	0.003994
DEPTOR	118	129	RKDDGTFPLDNE			10	1406.65	Default State	0	1407.46	0.008255	0	0	7.59111	0.002321
DEPTOR	118	129	RKDDGTFPLDNE			10	1406.65	Default State	0.005	1410.79	0.016772	3.33446	0.018693	7.57521	0.00206
DEPTOR	125	132	PLDNEVKA			6	885.468	Default State	0	885.916	0.007649	0	0	5.93642	0.002274
DEPTOR	125	132	PLDNEVKA			6	885.468	Default State	0.005	887.992	0.02309	2.07607	0.024324	5.9297	0.0014
DEPTOR	130	139	VKAFMRGQRL			9	1205.69	Default State	0	1206.48	0.052335	0	0	6.43128	0.001951
DEPTOR	130	139	VKAFMRGQRL			9	1205.69	Default State	0.005	1207.05	0.022814	0.563686	0.057091	6.42946	0.001912
DEPTOR	133	139	FMRGQRL			6	907.493	Default State	0	908.006	0.012769	0	0	6.1577	0.002501
DEPTOR	133	139	FMRGQRL			6	907.493	Default State	0.005	908.203	0.005913	0.196381	0.014071	6.15653	0.001977
DEPTOR	140	148	YEKLMSPEN			7	1110.51	Default State	0	1111.1	0.017782	0	0	6.76174	0.002698
DEPTOR	140	148	YEKLMSPEN			7	1110.51	Default State	0.005	1112.11	0.021268	1.00799	0.027723	6.7577	0.00144
DEPTOR	140	151	YEKLMSPENTLL			10	1437.73	Default State	0	1438.56	0.012064	0	0	9.91862	0.002844
DEPTOR	140	151	YEKLMSPENTLL			10	1437.73	Default State	0.005	1440.32	0.023319	1.7614	0.026254	9.9112	0.00204
DEPTOR	140	152	YEKLMSPENTLLQ			11	1565.79	Default State	0	1566.84	0.016397	0	0	9.31967	0.003132
DEPTOR	140	152	YEKLMSPENTLLQ			11	1565.79	Default State	0.005	1568.53	0.078869	1.68262	0.080555	9.30975	0.002497
DEPTOR	140	155	YEKLMSPENTLLQPRE			13	1947.98	Default State	0	1949.16	0.033334	0	0	8.76562	0.002566
DEPTOR	140	155	YEKLMSPENTLLQPRE			13	1947.98	Default State	0.005	1951.17	0.036648	2.0137	0.04954	8.75569	0.001967
DEPTOR	140	157	YEKLMSPENTLLQPREEE			15	2206.07	Default State	0	2207.44	0.014954	0	0	8.8086	0.002319
DEPTOR	140	157	YEKLMSPENTLLQPREEE			15	2206.07	Default State	0.005	2209.79	0.038631	2.34709	0.041424	8.79676	0.002176
DEPTOR	140	158	YEKLMSPENTLLQPREEEG			16	2263.09	Default State	0	2264.48	0.019101	0	0	8.768	0.002813
DEPTOR	140	158	YEKLMSPENTLLQPREEEG			16	2263.09	Default State	0.005	2267.18	0.030644	2.70146	0.03611	8.75772	0.001638
DEPTOR	140	161	YEKLMSPENTLLQPREEEGVKY			19	2653.32	Default State	0	2654.86	0.01886	0	0	8.93641	0.003856
DEPTOR	140	161	YEKLMSPENTLLQPREEEGVKY			19	2653.32	Default State	0.005	2658.02	0.046044	3.15224	0.049757	8.92895	0.002729
DEPTOR	140	164	YEKLMSPENTLLQPREEEGVKYERT			22	3039.51	Default State	0	3041.37	0.025343	0	0	8.11628	0.001245
DEPTOR	140	164	YEKLMSPENTLLQPREEEGVKYERT			22	3039.51	Default State	0.005	3044.74	0.068551	3.37201	0.073086	8.10503	0.00156
DEPTOR	140	165	YEKLMSPENTLLQPREEEGVKYERTF			23	3186.58	Default State	0	3188.51	0.021586	0	0	8.87544	0.007093
DEPTOR	140	165	YEKLMSPENTLLQPREEEGVKYERTF			23	3186.58	Default State	0.005	3191.69	0.100712	3.18169	0.103	8.8626	0.002196
DEPTOR	140	166	YEKLMSPENTLLQPREEEGVKYERTFM			24	3317.62	Default State	0	3319.66	0.020301	0	0	9.37867	0.002969
DEPTOR	140	166	YEKLMSPENTLLQPREEEGVKYERTFM			24	3317.62	Default State	0.005	3322.98	0.073153	3.32037	0.075917	9.36805	0.002179
DEPTOR	142	161	KLMSPENTLLQPREEEGVKY			17	2361.21	Default State	0	2362.71	0.006319	0	0	8.54752	0.0025
DEPTOR	142	161	KLMSPENTLLQPREEEGVKY			17	2361.21	Default State	0.005	2365.81	0.02255	3.10302	0.023419	8.53881	0.003127
DEPTOR	144	157	MSPENTLLQPREEE			11	1672.78	Default State	0	1673.76	0.20736	0	0	8.26036	0.004868
DEPTOR	144	157	MSPENTLLQPREEE			11	1672.78	Default State	0.005	1676.29	0.230152	2.53067	0.309787	8.24616	0.004333
DEPTOR	144	161	MSPENTLLQPREEEGVKY			15	2120.03	Default State	0	2121.42	0.028792	0	0	8.69349	0.002501
DEPTOR	144	161	MSPENTLLQPREEEGVKY			15	2120.03	Default State	0.005	2124.69	0.046106	3.26888	0.054357	8.68258	0.001388
DEPTOR	148	161	NTLLQPREEEGVKY			12	1675.87	Default State	0	1676.82	0.020419	0	0	8.93724	0.002909
DEPTOR	148	161	NTLLQPREEEGVKY			12	1675.87	Default State	0.005	1679.06	0.036574	2.23942	0.041888	8.92924	0.002235
DEPTOR	149	155	TLLQPRE			5	856.489	Default State	0	857.047	0.049764	0	0	6.71499	0.002534
DEPTOR	149	155	TLLQPRE			5	856.489	Default State	0.005	857.324	0.139036	0.277772	0.147674	6.7126	0.002257
DEPTOR	149	158	TLLQPREEEG			8	1171.6	Default State	0	1172.28	0.024684	0	0	6.80002	0.002462
DEPTOR	149	158	TLLQPREEEG			8	1171.6	Default State	0.005	1173.61	0.069257	1.32883	0.073524	6.79578	0.000965
DEPTOR	149	161	TLLQPREEEGVKY			11	1561.82	Default State	0	1562.66	0.011022	0	0	7.61581	0.004511
DEPTOR	149	161	TLLQPREEEGVKY			11	1561.82	Default State	0.005	1564.21	0.025294	1.54915	0.027591	7.61036	0.002135
DEPTOR	149	165	TLLQPREEEGVKYERTF			15	2095.08	Default State	0	2096.28	0.082077	0	0	7.89419	0.00326
DEPTOR	149	165	TLLQPREEEGVKYERTF			15	2095.08	Default State	0.005	2098.25	0.048026	1.97304	0.095096	7.88828	0.001793
DEPTOR	149	166	TLLQPREEEGVKYERTFM			16	2226.12	Default State	0	2227.53	0.014529	0	0	8.65618	0.002823
DEPTOR	149	166	TLLQPREEEGVKYERTFM			16	2226.12	Default State	0.005	2229.45	0.044901	1.91841	0.047193	8.65013	0.003872
DEPTOR	151	161	LQPREEEGVKY			9	1347.69	Default State	0	1348.46	0.036277	0	0	7.61496	0.003737
DEPTOR	151	161	LQPREEEGVKY			9	1347.69	Default State	0.005	1349.68	0.051305	1.21314	0.062835	7.60947	0.001652
DEPTOR	151	165	LQPREEEGVKYERTF			13	1880.95	Default State	0	1882.45	0.243893	0	0	7.89408	0.003604
DEPTOR	151	165	LQPREEEGVKYERTF			13	1880.95	Default State	0.005	1884.02	0.145938	1.57054	0.284221	7.88932	0.001963
DEPTOR	152	161	QPREEEGVKY			8	1234.61	Default State	0	1235.32	0.013871	0	0	5.72985	0.002559
DEPTOR	152	161	QPREEEGVKY			8	1234.61	Default State	0.005	1236.78	0.036	1.46934	0.03858	5.72787	0.001447
DEPTOR	152	165	QPREEEGVKYERTF			12	1767.87	Default State	0	1768.8	0.012527	0	0	6.56345	0.00359
DEPTOR	152	165	QPREEEGVKYERTF			12	1767.87	Default State	0.005	1770.55	0.144807	1.75066	0.145347	6.55948	0.002255
DEPTOR	152	166	QPREEEGVKYERTFM			13	1898.91	Default State	0	1900.09	0.019577	0	0	7.59286	0.003373
DEPTOR	152	166	QPREEEGVKYERTFM			13	1898.91	Default State	0.005	1901.82	0.068581	1.72849	0.071321	7.58526	0.001891
DEPTOR	171	189	LDWLVQEGEATTRKEAEQL			18	2216.12	Default State	0	2217.47	0.021567	0	0	10.4371	0.003117
DEPTOR	171	189	LDWLVQEGEATTRKEAEQL			18	2216.12	Default State	0.005	2219.68	0.146349	2.20684	0.147929	10.423	0.001922
DEPTOR	171	190	LDWLVQEGEATTRKEAEQLC			19	2319.13	Default State	0	2320.63	0.152776	0	0	10.7849	0.003681
DEPTOR	171	190	LDWLVQEGEATTRKEAEQLC			19	2319.13	Default State	0.005	2322.68	0.42578	2.05835	0.452359	10.7695	0.007443
DEPTOR	171	193	LDWLVQEGEATTRKEAEQLCHRL			22	2725.37	Default State	0	2727.13	0.021919	0	0	11.0162	0.004093
DEPTOR	171	193	LDWLVQEGEATTRKEAEQLCHRL			22	2725.37	Default State	0.005	2729.14	0.014714	2.01101	0.0264	11.0091	0.003458
DEPTOR	171	195	LDWLVQEGEATTRKEAEQLCHRLME			24	2985.46	Default State	0	2987.41	0.044293	0	0	11.6731	0.004594
DEPTOR	171	195	LDWLVQEGEATTRKEAEQLCHRLME			24	2985.46	Default State	0.005	2989.77	0.172173	2.35653	0.177779	11.6665	0.004047
DEPTOR	174	188	LVQEGEATTRKEAEQ			14	1688.85	Default State	0	1689.76	0.010328	0	0	4.89231	0.002151
DEPTOR	174	188	LVQEGEATTRKEAEQ			14	1688.85	Default State	0.005	1691.96	0.038994	2.2034	0.040339	4.87691	0.00159
DEPTOR	174	200	LVQEGEATTRKEAEQLCHRLMEHGIIQ			26	3119.57	Default State	0	3121.55	0.068723	0	0	10.0425	0.003347
DEPTOR	174	200	LVQEGEATTRKEAEQLCHRLMEHGIIQ			26	3119.57	Default State	0.005	3123.71	0.060193	2.15902	0.091356	10.0301	0.001261
DEPTOR	175	188	VQEGEATTRKEAEQ			13	1575.76	Default State	0	1576.63	0.006167	0	0	4.26145	0.001615
DEPTOR	175	188	VQEGEATTRKEAEQ			13	1575.76	Default State	0.005	1578.77	0.028774	2.13881	0.029427	4.25286	0.001439
DEPTOR	175	189	VQEGEATTRKEAEQL			14	1688.85	Default State	0	1689.72	0.018006	0	0	6.17312	0.002339
DEPTOR	175	189	VQEGEATTRKEAEQL			14	1688.85	Default State	0.005	1691.85	0.005934	2.13733	0.018959	6.15343	0.000516
DEPTOR	175	190	VQEGEATTRKEAEQLC			15	1791.85	Default State	0	1793.03	0.030609	0	0	6.8767	0.002235
DEPTOR	175	190	VQEGEATTRKEAEQLC			15	1791.85	Default State	0.005	1795.21	0.009404	2.18207	0.032021	6.8564	0.00121
DEPTOR	175	193	VQEGEATTRKEAEQLCHRL			18	2198.1	Default State	0	2199.37	0.059734	0	0	8.10605	0.003148
DEPTOR	175	193	VQEGEATTRKEAEQLCHRL			18	2198.1	Default State	0.005	2201.35	0.127717	1.97226	0.140996	8.08591	0.001929
DEPTOR	175	195	VQEGEATTRKEAEQLCHRLME			20	2458.18	Default State	0	2459.69	0.023067	0	0	9.2773	0.002705
DEPTOR	175	195	VQEGEATTRKEAEQLCHRLME			20	2458.18	Default State	0.005	2461.66	0.020996	1.97169	0.031192	9.26065	0.002405
DEPTOR	175	200	VQEGEATTRKEAEQLCHRLMEHGIIQ			25	3006.49	Default State	0	3008.36	0.027447	0	0	9.80127	0.002921
DEPTOR	175	200	VQEGEATTRKEAEQLCHRLMEHGIIQ			25	3006.49	Default State	0.005	3010.33	0.020959	1.9694	0.034534	9.7888	0.002751
DEPTOR	177	189	EGEATTRKEAEQL			12	1461.72	Default State	0	1462.47	0.019723	0	0	5.82251	0.002253
DEPTOR	177	189	EGEATTRKEAEQL			12	1461.72	Default State	0.005	1464.4	0.022691	1.92499	0.030065	5.80656	0.00152
DEPTOR	181	195	TTRKEAEQLCHRLME			14	1844.91	Default State	0	1846.16	0.023937	0	0	8.09032	0.003998
DEPTOR	181	195	TTRKEAEQLCHRLME			14	1844.91	Default State	0.005	1847.11	0.064179	0.948048	0.068497	8.07402	0.003812
DEPTOR	189	213	LCHRLMEHGIIQHVSSKHPFVDSNL			23	2897.47	Default State	0	2899.07	0.073002	0	0	7.6369	0.006825
DEPTOR	189	213	LCHRLMEHGIIQHVSSKHPFVDSNL			23	2897.47	Default State	0.005	2900.77	0.163262	1.69857	0.17884	7.63166	0.006961
DEPTOR	189	214	LCHRLMEHGIIQHVSSKHPFVDSNLL			24	3010.55	Default State	0	3012.49	0.084299	0	0	8.3089	0.006641
DEPTOR	189	214	LCHRLMEHGIIQHVSSKHPFVDSNLL			24	3010.55	Default State	0.005	3013.94	0.134123	1.44927	0.158415	8.31104	0.00789
DEPTOR	190	200	CHRLMEHGIIQ			10	1336.66	Default State	0	1337.63	0.039684	0	0	6.52004	0.003483
DEPTOR	190	200	CHRLMEHGIIQ			10	1336.66	Default State	0.005	1337.84	0.091015	0.219005	0.09929	6.51994	0.00485
DEPTOR	190	213	CHRLMEHGIIQHVSSKHPFVDSNL			22	2784.38	Default State	0	2786.13	0.0308	0	0	7.41589	0.001826
DEPTOR	190	213	CHRLMEHGIIQHVSSKHPFVDSNL			22	2784.38	Default State	0.005	2787.6	0.106528	1.46671	0.110891	7.40616	0.003944
DEPTOR	190	214	CHRLMEHGIIQHVSSKHPFVDSNLL			23	2897.47	Default State	0	2899.35	0.066571	0	0	8.12772	0.006434
DEPTOR	190	214	CHRLMEHGIIQHVSSKHPFVDSNLL			23	2897.47	Default State	0.005	2900.75	0.063168	1.40414	0.09177	8.12325	0.005299
DEPTOR	191	213	HRLMEHGIIQHVSSKHPFVDSNL			21	2681.37	Default State	0	2682.97	0.057081	0	0	7.31262	0.001907
DEPTOR	191	213	HRLMEHGIIQHVSSKHPFVDSNL			21	2681.37	Default State	0.005	2684.65	0.090247	1.68211	0.106783	7.30424	0.003979
DEPTOR	195	208	EHGIIQHVSSKHPF			12	1615.83	Default State	0	1616.81	0.08429	0	0	8.60777	0.003932
DEPTOR	195	208	EHGIIQHVSSKHPF			12	1615.83	Default State	0.005	1618.96	0.011762	2.15106	0.085106	8.59581	0.000648
DEPTOR	196	213	HGIIQHVSSKHPFVDSNL			16	2015.05	Default State	0	2016.19	0.013396	0	0	7.1757	0.003455
DEPTOR	196	213	HGIIQHVSSKHPFVDSNL			16	2015.05	Default State	0.005	2017.87	0.06957	1.68296	0.070848	7.17155	0.002872
DEPTOR	196	214	HGIIQHVSSKHPFVDSNLL			17	2128.13	Default State	0	2129.36	0.027054	0	0	8.19897	0.002241
DEPTOR	196	214	HGIIQHVSSKHPFVDSNLL			17	2128.13	Default State	0.005	2130.9	0.049692	1.54129	0.056579	8.19406	0.003522
DEPTOR	201	213	HVSSKHPFVDSNL			11	1466.74	Default State	0	1467.62	0.059989	0	0	6.9085	0.002534
DEPTOR	201	213	HVSSKHPFVDSNL			11	1466.74	Default State	0.005	1469.07	0.080359	1.44769	0.100281	6.90537	0.001783
DEPTOR	201	214	HVSSKHPFVDSNLL			12	1579.82	Default State	0	1580.86	0.066376	0	0	8.29069	0.003441
DEPTOR	201	214	HVSSKHPFVDSNLL			12	1579.82	Default State	0.005	1582.08	0.046759	1.21747	0.081192	8.29069	0.002545
DEPTOR	215	221	YQFRMNF			6	1005.46	Default State	0	1006.06	0.029162	0	0	10.4729	0.002606
DEPTOR	215	221	YQFRMNF			6	1005.46	Default State	0.005	1008.1	0.018911	2.04344	0.034758	10.4702	0.00072
DEPTOR	230	248	LLNEKSPSSQETHDSPFCL			16	2132	Default State	0	2133.31	0.01263	0	0	9.76426	0.0038
DEPTOR	230	248	LLNEKSPSSQETHDSPFCL			16	2132	Default State	0.005	2138.84	0.054358	5.52475	0.055806	9.75896	0.002764
DEPTOR	231	238	LNEKSPSS			6	861.431	Default State	0	861.98	0.037462	0	0	4.23216	0.001885
DEPTOR	231	238	LNEKSPSS			6	861.431	Default State	0.005	865.032	0.080335	3.05215	0.088641	4.22728	0.000208
DEPTOR	231	248	LNEKSPSSQETHDSPFCL			15	2018.91	Default State	0	2020.05	0.00967	0	0	9.47301	0.00334
DEPTOR	231	248	LNEKSPSSQETHDSPFCL			15	2018.91	Default State	0.005	2025.35	0.027282	5.30247	0.028945	9.46712	0.00241
DEPTOR	232	247	NEKSPSSQETHDSPFC			13	1792.74	Default State	0	1793.78	0.01911	0	0	7.15246	0.002829
DEPTOR	232	247	NEKSPSSQETHDSPFC			13	1792.74	Default State	0.005	1798.03	0.082649	4.25751	0.084829	7.14631	0.00139
DEPTOR	232	248	NEKSPSSQETHDSPFCL			14	1905.83	Default State	0	1906.94	0.004574	0	0	9.39797	0.002697
DEPTOR	232	248	NEKSPSSQETHDSPFCL			14	1905.83	Default State	0.005	1911.73	0.007958	4.79615	0.009179	9.39302	0.001671
DEPTOR	232	261	NEKSPSSQETHDSPFCLRKQSHDNRKSTSF			27	3477.62	Default State	0	3479.63	0.022159	0	0	6.11143	0.003067
DEPTOR	232	261	NEKSPSSQETHDSPFCLRKQSHDNRKSTSF			27	3477.62	Default State	0.005	3486.05	0.105646	6.42587	0.107945	6.10805	0.002646
DEPTOR	239	248	QETHDSPFCL			8	1176.5	Default State	0	1177.2	0.021025	0	0	10.1815	0.002696
DEPTOR	239	248	QETHDSPFCL			8	1176.5	Default State	0.005	1179.72	0.034454	2.51401	0.040362	10.1772	0.001715
DEPTOR	240	248	ETHDSPFCL			7	1048.44	Default State	0	1049.08	0.026213	0	0	10.2409	0.002995
DEPTOR	240	248	ETHDSPFCL			7	1048.44	Default State	0.005	1051.26	0.11525	2.17359	0.118194	10.2362	0.002694
DEPTOR	248	261	LRKQSHDNRKSTSF			13	1703.89	Default State	0	1704.82	0.026507	0	0	4.07215	0.002022
DEPTOR	248	261	LRKQSHDNRKSTSF			13	1703.89	Default State	0.005	1708.12	0.058756	3.29801	0.064459	4.07376	0.002725
DEPTOR	249	261	RKQSHDNRKSTSF			12	1590.81	Default State	0	1591.64	0.02371	0	0	3.9381	0.00285
DEPTOR	249	261	RKQSHDNRKSTSF			12	1590.81	Default State	0.005	1594.64	0.059095	3.00075	0.063674	3.93944	0.003261
DEPTOR	262	269	MSVSPSKE			6	864.413	Default State	0	864.883	0.013942	0	0	4.96643	0.001929
DEPTOR	262	269	MSVSPSKE			6	864.413	Default State	0.005	868.052	0.009691	3.16924	0.016979	4.96073	0.001781
DEPTOR	262	274	MSVSPSKEIKIVS			11	1404.78	Default State	0	1405.59	0.013389	0	0	7.3521	0.001616
DEPTOR	262	274	MSVSPSKEIKIVS			11	1404.78	Default State	0.005	1411.83	0.036345	6.24046	0.038733	7.32573	0.001446
DEPTOR	262	275	MSVSPSKEIKIVSA			12	1475.81	Default State	0	1476.7	0.012034	0	0	7.55473	0.002463
DEPTOR	262	275	MSVSPSKEIKIVSA			12	1475.81	Default State	0.005	1483.4	0.057369	6.70472	0.058618	7.5197	0.001748
DEPTOR	263	269	SVSPSKE			5	733.373	Default State	0	733.71	0.010472	0	0	4.96629	0.001937
DEPTOR	263	269	SVSPSKE			5	733.373	Default State	0.005	736.425	0.022889	2.71542	0.025171	4.96096	0.002013
DEPTOR	263	275	SVSPSKEIKIVSA			11	1344.77	Default State	0	1345.4	0.003904	0	0	7.55446	0.00227
DEPTOR	263	275	SVSPSKEIKIVSA			11	1344.77	Default State	0.005	1351.75	0.031542	6.35625	0.031783	7.51532	0.002251
DEPTOR	264	275	VSPSKEIKIVSA			10	1257.74	Default State	0	1258.53	0.060549	0	0	7.55508	0.002526
DEPTOR	264	275	VSPSKEIKIVSA			10	1257.74	Default State	0.005	1263.72	0.107174	5.18137	0.123095	7.51994	0.00375
DEPTOR	276	288	VRRSSMSSCGSSG			12	1300.57	Default State	0	1301.38	0.026897	0	0	4.29088	0.002669
DEPTOR	276	288	VRRSSMSSCGSSG			12	1300.57	Default State	0.005	1305.7	0.098653	4.31695	0.102254	4.28509	0.001622
DEPTOR	276	289	VRRSSMSSCGSSGY			13	1463.64	Default State	0	1464.56	0.030189	0	0	5.51849	0.003583
DEPTOR	276	289	VRRSSMSSCGSSGY			13	1463.64	Default State	0.005	1469.07	0.01492	4.50631	0.033675	5.51239	0.002896
DEPTOR	276	290	VRRSSMSSCGSSGYF			14	1610.7	Default State	0	1611.75	0.032278	0	0	7.91819	0.002801
DEPTOR	276	290	VRRSSMSSCGSSGYF			14	1610.7	Default State	0.005	1616.58	0.103232	4.83758	0.108161	7.91448	0.00125
DEPTOR	282	289	SSCGSSGY			7	747.261	Default State	0	747.691	0.008544	0	0	5.43105	0.002413
DEPTOR	282	289	SSCGSSGY			7	747.261	Default State	0.005	750.429	0.009693	2.73756	0.012921	5.42681	0.000467
DEPTOR	282	290	SSCGSSGYF			8	894.33	Default State	0	894.868	0.017351	0	0	8.95007	0.002992
DEPTOR	282	290	SSCGSSGYF			8	894.33	Default State	0.005	897.842	0.012077	2.97382	0.021141	8.94963	0.000363
DEPTOR	289	296	YFSSSPTL			6	901.43	Default State	0	901.868	0.016182	0	0	8.94915	0.002982
DEPTOR	289	296	YFSSSPTL			6	901.43	Default State	0.005	904.758	0.006302	2.89044	0.017365	8.94283	0.001301
DEPTOR	289	303	YFSSSPTLSSSPPVL			11	1568.78	Default State	0	1569.7	0.007032	0	0	9.96496	0.002877
DEPTOR	289	303	YFSSSPTLSSSPPVL			11	1568.78	Default State	0.005	1574.79	0.120796	5.08851	0.121001	9.95346	0.002506
DEPTOR	289	317	YFSSSPTLSSSPPVLCNPKSVLKRPVTSE			23	3107.61	Default State	0	3109.36	0.0654	0	0	8.62409	0.001964
DEPTOR	289	317	YFSSSPTLSSSPPVLCNPKSVLKRPVTSE			23	3107.61	Default State	0.005	3121.03	0.050501	11.6685	0.082629	8.59738	0.001227
DEPTOR	289	318	YFSSSPTLSSSPPVLCNPKSVLKRPVTSEE			24	3236.65	Default State	0	3238.62	0.008168	0	0	8.62909	0.002146
DEPTOR	289	318	YFSSSPTLSSSPPVLCNPKSVLKRPVTSEE			24	3236.65	Default State	0.005	3249.89	0.053418	11.2719	0.054039	8.60296	0.001903
DEPTOR	290	296	FSSSPTL			5	738.367	Default State	0	738.719	0.018534	0	0	7.93241	0.002113
DEPTOR	290	296	FSSSPTL			5	738.367	Default State	0.005	741.228	0.005351	2.50825	0.019291	7.92767	0.001282
DEPTOR	290	303	FSSSPTLSSSPPVL			10	1405.72	Default State	0	1406.47	0.022655	0	0	9.33527	0.003047
DEPTOR	290	303	FSSSPTLSSSPPVL			10	1405.72	Default State	0.005	1411.46	0.165418	4.99091	0.166962	9.32115	0.003272
DEPTOR	290	317	FSSSPTLSSSPPVLCNPKSVLKRPVTSE			22	2944.54	Default State	0	2946.34	0.030623	0	0	8.29732	0.002818
DEPTOR	290	317	FSSSPTLSSSPPVLCNPKSVLKRPVTSE			22	2944.54	Default State	0.005	2957.31	0.167202	10.9676	0.169983	8.26753	0.002454
DEPTOR	290	318	FSSSPTLSSSPPVLCNPKSVLKRPVTSEE			23	3073.59	Default State	0	3075.43	0.009859	0	0	8.30776	0.003816
DEPTOR	290	318	FSSSPTLSSSPPVLCNPKSVLKRPVTSEE			23	3073.59	Default State	0.005	3086.55	0.059288	11.1243	0.060103	8.28196	0.002451
DEPTOR	291	318	SSSPTLSSSPPVLCNPKSVLKRPVTSEE			22	2926.52	Default State	0	2928.01	0.142424	0	0	8.01781	0.002723
DEPTOR	291	318	SSSPTLSSSPPVLCNPKSVLKRPVTSEE			22	2926.52	Default State	0.005	2939.38	0.145465	11.3722	0.20358	7.9899	0.002311
DEPTOR	294	318	PTLSSSPPVLCNPKSVLKRPVTSEE			19	2665.42	Default State	0	2667.05	0.034646	0	0	8.00856	0.002392
DEPTOR	294	318	PTLSSSPPVLCNPKSVLKRPVTSEE			19	2665.42	Default State	0.005	2676.65	0.169283	9.59894	0.172792	7.98069	0.003553
DEPTOR	297	303	SSSPPVL			4	686.372	Default State	0	686.647	0.010952	0	0	7.59101	0.002477
DEPTOR	297	303	SSSPPVL			4	686.372	Default State	0.005	688.789	0.003683	2.14203	0.011555	7.58121	0.001944
DEPTOR	297	310	SSSPPVLCNPKSVL			10	1427.76	Default State	0	1428.58	0.11597	0	0	9.11538	0.006798
DEPTOR	297	310	SSSPPVLCNPKSVL			10	1427.76	Default State	0.005	1434.51	0.0085	5.93042	0.116281	9.09005	0.001699
DEPTOR	297	317	SSSPPVLCNPKSVLKRPVTSE			16	2225.2	Default State	0	2226.44	0.104088	0	0	7.44486	0.002051
DEPTOR	297	317	SSSPPVLCNPKSVLKRPVTSE			16	2225.2	Default State	0.005	2234.88	0.076999	8.44738	0.129472	7.41562	0.003032
DEPTOR	297	318	SSSPPVLCNPKSVLKRPVTSEE			17	2354.24	Default State	0	2355.63	0.015053	0	0	7.47422	0.0022
DEPTOR	297	318	SSSPPVLCNPKSVLKRPVTSEE			17	2354.24	Default State	0.005	2363.88	0.057139	8.24677	0.059089	7.44571	0.001714
DEPTOR	297	319	SSSPPVLCNPKSVLKRPVTSEEL			18	2467.32	Default State	0	2468.8	0.020929	0	0	8.33101	0.005386
DEPTOR	297	319	SSSPPVLCNPKSVLKRPVTSEEL			18	2467.32	Default State	0.005	2476.91	0.072844	8.10762	0.075791	8.303	0.002657
DEPTOR	300	318	PPVLCNPKSVLKRPVTSEE			14	2093.14	Default State	0	2094.47	0.029345	0	0	7.47347	0.001932
DEPTOR	300	318	PPVLCNPKSVLKRPVTSEE			14	2093.14	Default State	0.005	2101.61	0.077241	7.14001	0.082628	7.4455	0.001948
DEPTOR	304	317	CNPKSVLKRPVTSE			11	1557.84	Default State	0	1558.74	0.024465	0	0	5.46508	0.002749
DEPTOR	304	317	CNPKSVLKRPVTSE			11	1557.84	Default State	0.005	1564.01	0.105172	5.26607	0.10798	5.44001	0.001351
DEPTOR	304	318	CNPKSVLKRPVTSEE			12	1686.88	Default State	0	1687.85	0.062647	0	0	5.57662	0.002569
DEPTOR	304	318	CNPKSVLKRPVTSEE			12	1686.88	Default State	0.005	1693.32	0.108764	5.46757	0.125516	5.55012	0.002124
DEPTOR	304	319	CNPKSVLKRPVTSEEL			13	1799.97	Default State	0	1801.4	0.114352	0	0	6.89526	0.002556
DEPTOR	304	319	CNPKSVLKRPVTSEEL			13	1799.97	Default State	0.005	1806.37	0.136299	4.97312	0.177915	6.87484	0.002176
DEPTOR	306	318	PKSVLKRPVTSEE			10	1469.83	Default State	0	1470.66	0.019826	0	0	5.57502	0.003989
DEPTOR	306	318	PKSVLKRPVTSEE			10	1469.83	Default State	0.005	1473.78	0.050523	3.11624	0.054274	5.55373	0.002152
DEPTOR	318	331	ELLTPGAPYARKTF			11	1563.85	Default State	0	1564.77	0.008018	0	0	8.31034	0.003744
DEPTOR	318	331	ELLTPGAPYARKTF			11	1563.85	Default State	0.005	1566.26	0.030869	1.48492	0.031893	8.30731	0.002086
DEPTOR	318	332	ELLTPGAPYARKTFT			12	1664.9	Default State	0	1666	0.046143	0	0	8.12121	0.002354
DEPTOR	318	332	ELLTPGAPYARKTFT			12	1664.9	Default State	0.005	1667.57	0.047246	1.56856	0.066041	8.11285	0.001571
DEPTOR	318	335	ELLTPGAPYARKTFTIVG			15	1934.07	Default State	0	1935.15	0.019384	0	0	9.34754	0.003119
DEPTOR	318	335	ELLTPGAPYARKTFTIVG			15	1934.07	Default State	0.005	1936.93	0.050773	1.77857	0.054347	9.34153	0.00213
DEPTOR	318	341	ELLTPGAPYARKTFTIVGDAVGWG			21	2519.33	Default State	0	2520.86	0.02074	0	0	11.3376	0.003307
DEPTOR	318	341	ELLTPGAPYARKTFTIVGDAVGWG			21	2519.33	Default State	0.005	2524.88	0.153145	4.01637	0.154543	11.3199	0.002237
DEPTOR	319	331	LLTPGAPYARKTF			10	1434.81	Default State	0	1435.67	0.018682	0	0	7.8103	0.00251
DEPTOR	319	331	LLTPGAPYARKTF			10	1434.81	Default State	0.005	1437.17	0.050392	1.50315	0.053743	7.80394	0.001725
DEPTOR	319	335	LLTPGAPYARKTFTIVG			14	1805.03	Default State	0	1806.03	0.010281	0	0	9.00284	0.003957
DEPTOR	319	335	LLTPGAPYARKTFTIVG			14	1805.03	Default State	0.005	1807.74	0.055331	1.71148	0.056278	8.99602	0.002077
DEPTOR	319	337	LLTPGAPYARKTFTIVGDA			16	1991.1	Default State	0	1992.3	0.026989	0	0	9.15911	0.002881
DEPTOR	319	337	LLTPGAPYARKTFTIVGDA			16	1991.1	Default State	0.005	1994.52	0.05868	2.22345	0.06459	9.14939	0.002623
DEPTOR	319	341	LLTPGAPYARKTFTIVGDAVGWG			20	2390.29	Default State	0	2391.7	0.017658	0	0	11.1233	0.000827
DEPTOR	319	341	LLTPGAPYARKTFTIVGDAVGWG			20	2390.29	Default State	0.005	2395.87	0.108805	4.16936	0.110229	11.1056	0.00177
DEPTOR	320	331	LTPGAPYARKTF			9	1321.73	Default State	0	1322.64	0.095321	0	0	6.93721	0.004665
DEPTOR	320	331	LTPGAPYARKTF			9	1321.73	Default State	0.005	1323.9	0.066981	1.26116	0.116501	6.93333	0.003451
DEPTOR	320	332	LTPGAPYARKTFT			10	1422.77	Default State	0	1423.71	0.03054	0	0	6.78098	0.002697
DEPTOR	320	332	LTPGAPYARKTFT			10	1422.77	Default State	0.005	1425.34	0.055637	1.62625	0.063467	6.77211	0.002401
DEPTOR	320	335	LTPGAPYARKTFTIVG			13	1691.95	Default State	0	1692.89	0.010734	0	0	8.41719	0.00318
DEPTOR	320	335	LTPGAPYARKTFTIVG			13	1691.95	Default State	0.005	1694.56	0.047934	1.66506	0.049121	8.40975	0.002756
DEPTOR	320	341	LTPGAPYARKTFTIVGDAVGWG			19	2277.2	Default State	0	2278.57	0.020653	0	0	10.7459	0.002768
DEPTOR	320	341	LTPGAPYARKTFTIVGDAVGWG			19	2277.2	Default State	0.005	2282.59	0.196592	4.02664	0.197674	10.7314	0.002318
DEPTOR	321	331	TPGAPYARKTF			8	1208.64	Default State	0	1209.39	0.024779	0	0	7.71397	0.087844
DEPTOR	321	331	TPGAPYARKTF			8	1208.64	Default State	0.005	1210.48	0.016327	1.08373	0.029675	7.62402	0.0011
DEPTOR	321	332	TPGAPYARKTFT			9	1309.69	Default State	0	1310.48	0.008845	0	0	7.63745	0.002929
DEPTOR	321	332	TPGAPYARKTFT			9	1309.69	Default State	0.005	1311.88	0.040416	1.40175	0.041372	7.62984	0.003006
DEPTOR	321	335	TPGAPYARKTFTIVG			12	1578.86	Default State	0	1579.77	0.041715	0	0	9.00186	0.004703
DEPTOR	321	335	TPGAPYARKTFTIVG			12	1578.86	Default State	0.005	1581.33	0.095042	1.56018	0.103794	8.99593	0.003006
DEPTOR	322	331	PGAPYARKTF			7	1107.59	Default State	0	1108.16	0.032873	0	0	7.81184	0.002922
DEPTOR	322	331	PGAPYARKTF			7	1107.59	Default State	0.005	1108.83	0.023506	0.66888	0.040412	7.81182	0.003019
DEPTOR	322	332	PGAPYARKTFT			8	1208.64	Default State	0	1209.37	0.049644	0	0	7.77742	0.073287
DEPTOR	322	332	PGAPYARKTFT			8	1208.64	Default State	0.005	1210.64	0.038611	1.26541	0.062891	7.80463	0.002065
DEPTOR	322	335	PGAPYARKTFTIVG			11	1477.82	Default State	0	1478.64	0.041637	0	0	9.0024	0.004353
DEPTOR	322	335	PGAPYARKTFTIVG			11	1477.82	Default State	0.005	1480.06	0.050501	1.41905	0.065453	8.99669	0.003081
DEPTOR	332	341	TIVGDAVGWG			9	974.494	Default State	0	975.049	0.030684	0	0	10.1972	0.005296
DEPTOR	332	341	TIVGDAVGWG			9	974.494	Default State	0.005	977.694	0.061335	2.64523	0.068582	10.1899	0.001397
DEPTOR	332	342	TIVGDAVGWGF			10	1121.56	Default State	0	1122.33	0.055101	0	0	12.332	0.002438
DEPTOR	332	342	TIVGDAVGWGF			10	1121.56	Default State	0.005	1124.61	0.214404	2.28196	0.221371	12.3221	0.00284
DEPTOR	333	341	IVGDAVGWG			8	873.447	Default State	0	873.903	0.00565	0	0	9.54939	0.001743
DEPTOR	333	341	IVGDAVGWG			8	873.447	Default State	0.005	876.321	0.036499	2.4181	0.036934	9.54371	0.00146
DEPTOR	333	342	IVGDAVGWGF			9	1020.51	Default State	0	1021.1	0.009177	0	0	12.0815	0.002977
DEPTOR	333	342	IVGDAVGWGF			9	1020.51	Default State	0.005	1023.62	0.060128	2.52008	0.060824	12.0752	0.003426
DEPTOR	342	365	FVVRGSKPCHIQAVDPSGPAAAAG			20	2335.2	Default State	0	2336.64	0.041262	0	0	6.61327	0.002196
DEPTOR	342	365	FVVRGSKPCHIQAVDPSGPAAAAG			20	2335.2	Default State	0.005	2339.01	0.126647	2.36215	0.133199	6.60744	0.001511
DEPTOR	342	366	FVVRGSKPCHIQAVDPSGPAAAAGM			21	2466.24	Default State	0	2467.82	0.038792	0	0	7.56087	0.001873
DEPTOR	342	366	FVVRGSKPCHIQAVDPSGPAAAAGM			21	2466.24	Default State	0.005	2470.21	0.075662	2.38857	0.085027	7.55375	0.002127
DEPTOR	343	365	VVRGSKPCHIQAVDPSGPAAAAG			19	2188.13	Default State	0	2189.39	0.103746	0	0	5.75083	0.003372
DEPTOR	343	365	VVRGSKPCHIQAVDPSGPAAAAG			19	2188.13	Default State	0.005	2191.82	0.195122	2.42447	0.220988	5.74511	0.002039
DEPTOR	343	366	VVRGSKPCHIQAVDPSGPAAAAGM			20	2319.17	Default State	0	2320.59	0.015672	0	0	7.00367	0.002506
DEPTOR	343	366	VVRGSKPCHIQAVDPSGPAAAAGM			20	2319.17	Default State	0.005	2323.1	0.072027	2.50913	0.073712	6.99547	0.001602
DEPTOR	343	370	VVRGSKPCHIQAVDPSGPAAAAGMKVCQ			24	2777.4	Default State	0	2779.11	0.111666	0	0	7.04265	0.003624
DEPTOR	343	370	VVRGSKPCHIQAVDPSGPAAAAGMKVCQ			24	2777.4	Default State	0.005	2781.48	0.086772	2.36574	0.141417	7.03439	0.002012
DEPTOR	371	378	FVVSVNGL			7	834.472	Default State	0	834.869	0.012099	0	0	10.2427	0.002919
DEPTOR	371	378	FVVSVNGL			7	834.472	Default State	0.005	835.423	0.026622	0.553719	0.029243	10.2395	0.001424
DEPTOR	371	385	FVVSVNGLNVLHVDY			14	1674.88	Default State	0	1675.89	0.01217	0	0	11.3401	0.001136
DEPTOR	371	385	FVVSVNGLNVLHVDY			14	1674.88	Default State	0.005	1676.94	0.01621	1.05125	0.02027	11.3332	0.000972
DEPTOR	371	391	FVVSVNGLNVLHVDYRTVNNL			20	2372.27	Default State	0	2373.62	0.028062	0	0	10.8627	0.003874
DEPTOR	371	391	FVVSVNGLNVLHVDYRTVNNL			20	2372.27	Default State	0.005	2375.26	0.10153	1.63912	0.105336	10.8564	0.003381
DEPTOR	372	378	VVSVNGL			6	687.404	Default State	0	687.666	0.002281	0	0	8.24401	0.003208
DEPTOR	372	378	VVSVNGL			6	687.404	Default State	0.005	688.282	0.015319	0.615033	0.015488	8.2399	0.001651
DEPTOR	372	381	VVSVNGLNVL			9	1013.6	Default State	0	1014.12	0.030979	0	0	10.2825	0.002791
DEPTOR	372	381	VVSVNGLNVL			9	1013.6	Default State	0.005	1015.32	0.061223	1.19972	0.068615	10.2789	0.001572
DEPTOR	372	385	VVSVNGLNVLHVDY			13	1527.82	Default State	0	1528.75	0.020319	0	0	10.3299	0.003566
DEPTOR	372	385	VVSVNGLNVLHVDY			13	1527.82	Default State	0.005	1530.08	0.033041	1.32895	0.038789	10.3223	0.003034
DEPTOR	379	385	NVLHVDY			6	859.431	Default State	0	859.841	0.005869	0	0	8.17711	0.002431
DEPTOR	379	385	NVLHVDY			6	859.431	Default State	0.005	860.255	0.019058	0.413614	0.019941	8.1727	0.00202
DEPTOR	379	391	NVLHVDYRTVNNL			12	1556.82	Default State	0	1557.74	0.028166	0	0	8.47225	0.003149
DEPTOR	379	391	NVLHVDYRTVNNL			12	1556.82	Default State	0.005	1558.41	0.106645	0.673485	0.110302	8.46615	0.002088
DEPTOR	381	397	LHVDYRTVNNLILTGPR			15	1981.1	Default State	0	1982.38	0.05686	0	0	7.62457	0.011778
DEPTOR	381	397	LHVDYRTVNNLILTGPR			15	1981.1	Default State	0.005	1985.91	0.340098	3.53328	0.344818	7.6089	0.00901
DEPTOR	382	391	HVDYRTVNNL			9	1230.62	Default State	0	1231.28	0.012856	0	0	6.9519	0.002831
DEPTOR	382	391	HVDYRTVNNL			9	1230.62	Default State	0.005	1231.81	0.024142	0.523709	0.027351	6.948	0.000982
DEPTOR	386	393	RTVNNLIL			7	942.573	Default State	0	943.096	0.00743	0	0	9.14694	0.002358
DEPTOR	386	393	RTVNNLIL			7	942.573	Default State	0.005	943.183	0.019828	0.087238	0.021174	9.14413	0.002965
DEPTOR	391	398	LILTGPRT			6	870.541	Default State	0	870.995	0.010138	0	0	7.25033	0.002451
DEPTOR	391	398	LILTGPRT			6	870.541	Default State	0.005	872.263	0.026168	1.26834	0.028063	7.2454	0.001633
DEPTOR	391	400	LILTGPRTIV			8	1082.69	Default State	0	1083.34	0.041451	0	0	9.0654	0.00344
DEPTOR	391	400	LILTGPRTIV			8	1082.69	Default State	0.005	1084.58	0.043943	1.23695	0.060409	9.05932	0.003313
DEPTOR	391	401	LILTGPRTIVM			9	1213.73	Default State	0	1214.45	0.013369	0	0	9.79757	0.002735
DEPTOR	391	401	LILTGPRTIVM			9	1213.73	Default State	0.005	1215.67	0.023629	1.21551	0.027149	9.79303	0.002745
DEPTOR	391	402	LILTGPRTIVME			10	1342.78	Default State	0	1343.63	0.027674	0	0	9.46327	0.002259
DEPTOR	391	402	LILTGPRTIVME			10	1342.78	Default State	0.005	1344.82	0.092233	1.19381	0.096295	9.45753	0.003395
DEPTOR	392	400	ILTGPRTIV			7	969.609	Default State	0	970.15	0.010241	0	0	7.8956	0.002591
DEPTOR	392	400	ILTGPRTIV			7	969.609	Default State	0.005	971.312	0.020879	1.16264	0.023256	7.89032	0.002062
DEPTOR	392	402	ILTGPRTIVME			9	1229.69	Default State	0	1230.4	0.007382	0	0	8.45576	0.003922
DEPTOR	392	402	ILTGPRTIVME			9	1229.69	Default State	0.005	1231.54	0.022733	1.13311	0.023901	8.44906	0.001926
DEPTOR	393	401	LTGPRTIVM			7	987.566	Default State	0	988.14	0.10011	0	0	9.79686	0.005092
DEPTOR	393	401	LTGPRTIVM			7	987.566	Default State	0.005	989.125	0.024629	0.984586	0.103095	9.79191	0.003149
DEPTOR	394	401	TGPRTIVM			6	874.481	Default State	0	875.014	0.028277	0	0	8.80467	0.003337
DEPTOR	394	401	TGPRTIVM			6	874.481	Default State	0.005	875.978	0.030119	0.964118	0.041313	8.80025	0.001924
