# Supplementary material for: Bipartite binding and partial inhibition links DEPTOR and mTOR in a mutually antagonistic embrace
Source: eLife. 2021 Sep 14;10:e68799. doi: 10.7554/eLife.68799 (PMC8439657; doi:10.7554/eLife.68799)
Supplement: Supplementary file 2. [file elife-68799-supp2.xlsx]

## Sheet: Meta Data
Supplementary file 2
HDX Meta Data Table
Data Set			DEPTOR
Number of peptides			85
Average Standard Deviation			0.00468625
Timepoints (min)			[0.05, 0.5, 5, 50.0]
Mean Difference			-0.00491022
Number of Repeats			3

## Sheet: Summary
				Date:			01.01.19		SD	0.00468625																														Threshold Daltons=		0.26
Global Color scale				Experiment date:			25.12.18			-0.00491022																														Threshold percent		0.018
0.1	0.35	0.7		Sample:			Deptor									-0.1	-0.02	0.02	0.1																					t-threshold		2.776
				Instrument:			Waters Synapt G2 Si
																							STDEVS				STDEVS
		Max Frac Deut		0.7		a	Deptor + FRB				b	Deptor alone					a-b differences						a	Deptor+ FRB			b	Deptor alone			Differences in Daltons (Differences >+/- 0.5Da Highlighted				t-test	*=assumes triplicate values, a p=0.05 test					sum of booleans
Start	End	Mod	m/z	#D	RT	0.05	0.5	5	50		0.05	0.5	5	50	Start	End	0.05	0.5	5	50	Start	End	0.05	0.5	5	50	0.05	0.5	5	50	0.05	0.5	5	50		0.05	0.5	5	50		0.05	0.5	5	50
-2	13		1465.55	15	3.68-3.72	0.526519	0.522311	0.516666	0.515738		0.539289	0.532263	0.523605	0.525377	-2	13	-0.0127703	-0.009952	-0.00693838	-0.00963943	-2	13	0.00272305	0.00177486	0.00610981	0.00326229	0.00239438	0.000968381	0.00837819	0.00844305	-0.191554	-0.14928	-0.104076	-0.144591		-6.10001	-8.52554	-1.15895	-1.84458		1	1	0	0
-2	26		2698.09	28	3.76-3.78	0.657191	0.65896	0.654958	0.654795		0.667891	0.664476	0.658242	0.662539	-2	26	-0.0106992	-0.00551597	-0.00328337	-0.00774398	-2	26	0.0053149	0.00192878	0.00328189	0.00251459	0.0055027	0.0009925	0.00762806	0.00660995	-0.299579	-0.154447	-0.0919343	-0.216831		-2.42232	-4.40445	-0.684837	-1.8966		1	1	0	0
-2	27		2811.17	29	4.74-4.76	0.588705	0.589675	0.585343	0.587376		0.600248	0.596099	0.590503	0.59368	-2	27	-0.0115435	-0.00642438	-0.00516069	-0.00630438	-2	27	0.00391749	0.00159197	0.00107089	0.00273059	0.00520163	0.00088	0.00490246	0.0057065	-0.334763	-0.186307	-0.14966	-0.182827		-3.07042	-6.11729	-1.78128	-1.72609		2	1	0	0
-2	28		2940.21	30	4.58-4.60	0.610795	0.61388	0.610017	0.611762		0.623632	0.620751	0.614814	0.615858	-2	28	-0.0128376	-0.00687067	-0.00479676	-0.00409686	-2	28	0.00418929	0.000959	0.00144633	0.00267343	0.00660929	0.00140314	0.00528919	0.00595581	-0.385127	-0.20612	-0.143903	-0.122906		-2.84153	-7.00203	-1.51517	-1.08695		2	1	0	0
-2	30		3227.36	32	5.54-5.57	0.509343	0.508485	0.504861	0.507694		0.526662	0.522116	0.516828	0.518225	-2	30	-0.0173191	-0.0136301	-0.0119674	-0.0105307	-2	30	0.00288813	0.00205138	0.00402946	0.00341156	0.00331955	0.00272902	0.00603103	0.00379799	-0.55421	-0.436163	-0.382956	-0.336981		-6.81749	-6.91496	-2.85776	-3.57273		2	2	2	2
-2	32		3427.44	34	6.10-6.13	0.496492	0.498942	0.49606	0.498988		0.513555	0.514173	0.509931	0.512801	-2	32	-0.0170627	-0.0152314	-0.0138708	-0.0138129	-2	32	0.00218832	0.00264748	0.00295382	0.00269849	0.00317416	0.00208895	0.00574929	0.00351441	-0.580131	-0.517869	-0.471609	-0.46964		-7.66549	-7.82288	-3.71691	-5.39951		2	2	2	2
2	30		2815.2	28	5.78-5.81	0.533525	0.535716	0.531512	0.533725		0.555961	0.549669	0.546705	0.547946	2	30	-0.0224359	-0.0139527	-0.015193	-0.0142214	2	30	0.00491347	0.00133648	0.00408883	0.0019026	0.00450189	0.00331316	0.00687556	0.0039174	-0.628204	-0.390676	-0.425404	-0.3982		-5.83132	-6.76455	-3.28959	-5.6561		3	2	2	2
2	32		3015.28	30	6.38-6.40	0.539353	0.547747	0.544293	0.546603		0.560513	0.557412	0.552155	0.551579	2	32	-0.02116	-0.00966476	-0.00786267	-0.00497514	2	32	0.0013669	0.00332605	0.00296552	0.00396343	0.00536395	0.00228848	0.00480619	0.00111948	-0.634799	-0.289943	-0.23588	-0.149254		-6.62107	-4.14631	-2.41145	-2.09232		3	2	0	0
11	30		2039.9	19	5.54-5.57	0.636526	0.631713	0.62867	0.631078		0.656772	0.65209	0.647852	0.648942	11	30	-0.020246	-0.0203771	-0.0191828	-0.0178643	11	30	0.00369617	0.00383564	0.00179677	0.00229451	0.0031888	0.00229962	0.00639045	0.00138872	-0.384674	-0.387164	-0.364473	-0.339421		-7.18352	-7.89193	-5.00517	-11.5367		3	3	3	2
40	46		936.574	6	5.42-5.50	0.0419202	0.149853	0.450201	0.483906		0.040509	0.159343	0.457019	0.487164	40	46	0.00141119	-0.00949048	-0.00681738	-0.00325762	40	46	0.00239071	0.00499524	0.0053631	0.00529714	0.00178452	0.00559524	0.00564071	0.00479881	0.00846714	-0.0569429	-0.0409043	-0.0195457		0.819314	-2.19155	-1.51709	-0.789406		0	0	0	0
43	64		2819.5	20	5.16-5.28	0.115642	0.214909	0.352269	0.375497		0.113919	0.220025	0.361012	0.38177	43	64	0.00172307	-0.0051165	-0.00874221	-0.00627229	43	64	0.00169064	0.00403564	0.00450357	0.00362407	0.00171014	0.00473343	0.00898271	0.00559757	0.0344614	-0.10233	-0.174844	-0.125446		1.24106	-1.4247	-1.5069	-1.62918		0	0	0	0
47	63		2137.14	15	3.81-3.90	0.135076	0.24407	0.365073	0.382689		0.136751	0.249115	0.371385	0.387143	47	63	-0.00167533	-0.00504533	-0.006312	-0.00445419	47	63	0.00446076	0.00904038	0.0150406	0.0163588	0.0044819	0.00769981	0.0170227	0.0156836	-0.02513	-0.07568	-0.09468	-0.0668129		-0.45889	-0.735897	-0.48129	-0.340426		0	0	0	0
64	85		2600.34	21	10.09-10.14	0.116827	0.219548	0.322692	0.48461		0.108906	0.219806	0.322243	0.481698	64	85	0.00792068	-0.000257619	0.000449524	0.00291286	64	85	0.00211599	0.00355803	0.0046685	0.00776952	0.00170048	0.00298224	0.00319374	0.0120765	0.166334	-0.00541	0.00944	0.06117		5.0538	-0.0961128	0.137649	0.351341		1	0	0	0
65	75		1328.75	10	11.47-11.51	0.0459491	0.077362	0.140537	0.32886		0.0332199	0.0845433	0.138736	0.333499	65	75	0.0127293	-0.00718129	0.00180157	-0.00463843	65	75	0.00770371	0.005198	0.00748371	0.0126496	0.003479	0.00349329	0.006587	0.00365229	0.127293	-0.0718129	0.0180157	-0.0463843		2.60832	-1.98608	0.31299	-0.610195		0	0	0	0
66	72		874.467	6	10.11-10.15	0.130558	0.231934	0.308172	0.47953		0.109171	0.238095	0.311424	0.480285	66	72	0.0213864	-0.00616119	-0.00325214	-0.000754524	66	72	0.0110138	0.01204	0.0108386	0.0117579	0.0091369	0.00890643	0.0101131	0.0142114	0.128319	-0.0369671	-0.0195129	-0.00452714		2.5885	-0.712564	-0.379985	-0.0708531		1	0	0	0
66	73		987.551	7	10.91-10.95	0.0538176	0.0865288	0.142744	0.332324		0.048518	0.0853953	0.145181	0.336163	66	73	0.00529959	0.00113347	-0.00243735	-0.00383857	66	73	0.00328633	0.000930204	0.00447102	0.00164592	0.000517959	0.00056449	0.00601122	0.00218061	0.0370971	0.00793429	-0.0170614	-0.02687		2.75908	1.8043	-0.563508	-2.43355		0	0	0	0
67	73		916.514	6	10.72-10.75	0.00863619	0.00987857	0.0381217	0.188955		0.00501333	0.0109533	0.037959	0.191409	67	73	0.00362286	-0.00107476	0.000162619	-0.00245333	67	73	0.00414571	0.00181381	0.00161214	0.00649976	0.00144	0.0014169	0.0067619	0.00304381	0.0217371	-0.00644857	0.000975714	-0.01472		1.42981	-0.808791	0.0405189	-0.592058		0	0	0	0
73	85		1498.75	12	3.57-3.60	0.174888	0.283569	0.352914	0.456373		0.168571	0.286204	0.358911	0.453653	73	85	0.00631714	-0.002635	-0.00599667	0.00271976	73	85	0.00336202	0.00292393	0.00902262	0.00934476	0.00310643	0.00635488	0.00552262	0.00939214	0.0758057	-0.03162	-0.07196	0.0326371		2.39033	-0.652434	-0.981843	0.355555		0	0	0	0
74	85		1385.67	11	2.51-2.53	0.191955	0.318679	0.394398	0.475669		0.19053	0.318765	0.39856	0.48043	74	85	0.00142442	-8.67532e-05	-0.0041613	-0.00476104	74	85	0.000772208	0.00242143	0.00365312	0.00113896	0.0032439	0.00242649	0.00496727	0.00298545	0.0156686	-0.000954286	-0.0457743	-0.0523714		0.73988	-0.0438334	-1.16893	-2.58075		0	0	0	0
75	85		1272.58	10	2.51-2.74	0.208865	0.326311	0.397829	0.483173		0.203301	0.326048	0.402348	0.476224	75	85	0.00556414	0.000263429	-0.00451871	0.00694957	75	85	0.00579686	0.00219057	0.00268371	0.00568986	0.00350629	0.00140829	0.00470171	0.00429829	0.0556414	0.00263429	-0.0451871	0.0694957		1.42254	0.175206	-1.4457	1.68801		0	0	0	0
82	88		830.509	6	5.70-5.75	0.0220564	0.0787002	0.143162	0.43874		0.0191945	0.0852798	0.149339	0.435718	82	88	0.0028619	-0.00657952	-0.00617714	0.00302262	82	88	0.00489071	0.00437738	0.002765	0.00533214	0.00365857	0.00273119	0.00650571	0.0081969	0.0171714	-0.0394771	-0.0370629	0.0181357		0.81159	-2.20874	-1.51355	0.535386		0	0	0	0
89	104		1864.92	15	5.92-5.98	0.075556	0.0991289	0.193711	0.369605		0.0734946	0.104437	0.190996	0.370302	89	104	0.00206143	-0.00530829	0.00271581	-0.000697333	89	104	0.00344648	0.00469914	0.00602486	0.0033621	0.00357895	0.00400657	0.00316619	0.003368	0.0309214	-0.0796243	0.0407371	-0.01046		0.718611	-1.48887	0.691128	-0.253802		0	0	0	0
105	113		1143.65	8	5.06-5.13	0.500251	0.533664	0.522181	0.527081		0.497013	0.541214	0.529208	0.532689	105	113	0.00323768	-0.00755	-0.00702714	-0.00560857	105	113	0.00253893	0.00294982	0.00354786	0.0029875	0.00452	0.00386768	0.00580411	0.00383929	0.0259014	-0.0604	-0.0562171	-0.0448686		1.0817	-2.68842	-1.78923	-1.9969		0	0	0	0
114	124		1451.71	10	6.73-6.79	0.22486	0.26005	0.351015	0.388479		0.231809	0.263896	0.356044	0.392178	114	124	-0.00694957	-0.00384543	-0.00502971	-0.00369943	114	124	0.00319543	0.00728414	0.011397	0.00815371	0.00633471	0.00700114	0.01022	0.00535529	-0.0694957	-0.0384543	-0.0502971	-0.0369943		-1.69654	-0.659244	-0.56909	-0.656845		0	0	0	0
118	132		1704.86	13	6.49-6.53	0.439124	0.464009	0.458383	0.458128		0.430479	0.46513	0.467791	0.466108	118	132	0.00864484	-0.00112143	-0.00940835	-0.00798077	118	132	0.0095844	0.0073978	0.00447571	0.00129352	0.00496319	0.00150648	0.00338011	0.00663352	0.112383	-0.0145786	-0.122309	-0.10375		1.38729	-0.25728	-2.90546	-2.0453		0	0	1	0
125	132		885.468	6	5.00-5.04	0.61439	0.688813	0.688607	0.690501		0.59855	0.684448	0.683663	0.683979	125	132	0.0158402	0.00436476	0.00494357	0.00652238	125	132	0.00284429	0.00296643	0.0034619	0.00293952	0.00558286	0.00603452	0.00530905	0.00550262	0.0950414	0.0261886	0.0296614	0.0391343		4.37882	1.12429	1.35097	1.81085		1	0	0	0
130	139		1205.69	9	5.40-5.47	0.0829141	0.339564	0.523124	0.610645		0.0739838	0.333398	0.527848	0.615547	130	139	0.00893032	0.00616587	-0.00472365	-0.00490127	130	139	0.00427016	0.00387952	0.00381317	0.00136413	0.00160508	0.0037873	0.00311508	0.0037754	0.0803729	0.0554929	-0.0425129	-0.0441114		3.39067	1.9698	-1.66164	-2.11476		1	0	0	0
140	155		1947.98	13	7.72-7.81	0.298102	0.452117	0.649651	0.71366		0.291114	0.462029	0.656684	0.720556	140	155	0.0069878	-0.00991154	-0.00703319	-0.00689593	140	155	0.0039044	0.0041422	0.00372033	0.00320011	0.00358714	0.00381231	0.00448088	0.00470714	0.0908414	-0.12885	-0.0914314	-0.0896471		2.28274	-3.04951	-2.09166	-2.09843		0	1	0	0
140	157		2206.07	15	7.77-7.85	0.279693	0.419402	0.599366	0.651551		0.273105	0.42595	0.600088	0.658302	140	157	0.00658724	-0.00654838	-0.00072181	-0.00675124	140	157	0.00151524	0.00288419	0.00209257	0.00143981	0.000687143	0.00217476	0.00317143	0.00425505	0.0988086	-0.0982257	-0.0108271	-0.101269		6.8576	-3.13993	-0.329039	-2.60315		1	1	0	0
140	158		2263.09	16	7.73-7.81	0.295236	0.41918	0.590998	0.638458		0.291215	0.427214	0.595755	0.649852	140	158	0.00402143	-0.00803437	-0.00475643	-0.0113945	140	158	0.00396304	0.00362991	0.0060467	0.00510616	0.0040433	0.0038908	0.00531491	0.00681384	0.0643429	-0.12855	-0.0761029	-0.182311		1.23027	-2.61522	-1.02334	-2.31783		0	0	0	0
144	161		2120.03	15	7.66-7.72	0.404394	0.626186	0.82819	0.842925		0.39034	0.63657	0.833676	0.848449	144	161	0.0140544	-0.0103835	-0.00548581	-0.00552371	144	161	0.00344657	0.00401629	0.00422467	0.0046981	0.003896	0.00360067	0.00524352	0.00382038	0.210816	-0.155753	-0.0822871	-0.0828557		4.6798	-3.33421	-1.41107	-1.57998		1	1	0	0
144	166		2784.33	20	8.25-8.29	0.305608	0.469423	0.62763	0.7061		0.299203	0.47738	0.633197	0.710175	144	166	0.00640464	-0.00795664	-0.00556707	-0.00407493	144	166	0.00138679	0.00277079	0.00337593	0.00623943	0.00252936	0.00368136	0.0063715	0.00769086	0.128093	-0.159133	-0.111341	-0.0814986		3.84567	-2.99102	-1.33726	-0.712674		1	1	0	0
148	161		1675.87	12	7.90-7.96	0.350335	0.588749	0.793858	0.818034		0.348797	0.595873	0.800923	0.823122	148	161	0.00153798	-0.00712369	-0.0070644	-0.00508857	148	161	0.00473738	0.00894429	0.00818488	0.00756357	0.00694845	0.00644369	0.00267857	0.00618988	0.0184557	-0.0854843	-0.0847729	-0.0610629		0.316758	-1.11928	-1.42079	-0.901788		0	0	0	0
149	161		1561.82	11	6.61-6.65	0.236161	0.459484	0.683746	0.698786		0.229331	0.470429	0.68994	0.710289	149	161	0.00683026	-0.0109449	-0.00619351	-0.0115034	149	161	0.00231078	0.00370766	0.00318688	0.00266558	0.00145571	0.0047439	0.00347584	0.00400273	0.0751329	-0.120394	-0.0681286	-0.126537		4.33175	-3.14856	-2.27485	-4.14309		1	1	0	1
151	165		1880.95	13	6.91-6.95	0.256176	0.420455	0.566281	0.636851		0.247546	0.432889	0.593448	0.66052	151	165	0.00862989	-0.0124344	-0.0271673	-0.0236697	151	165	0.00704659	0.00216813	0.0170284	0.00789011	0.00111319	0.00748791	0.00485659	0.0022633	0.112189	-0.161647	-0.353174	-0.307706		2.09524	-2.76275	-2.65737	-4.99458		0	0	2	3
152	166		1898.91	13	6.48-6.53	0.263206	0.395612	0.508159	0.612821		0.254045	0.400471	0.512481	0.615937	152	166	0.00916121	-0.0048589	-0.00432187	-0.00311626	152	166	0.00194846	0.00174066	0.00288253	0.00330121	0.00241736	0.00247275	0.00369593	0.00418484	0.119096	-0.0631657	-0.0561843	-0.0405114		5.1106	-2.78305	-1.59709	-1.01263		1	1	0	0
171	188		2103.04	17	8.29-8.33	0.19249	0.319305	0.43334	0.527919		0.187577	0.321982	0.431714	0.527214	171	188	0.00491361	-0.00267714	0.00162605	0.00070563	171	188	0.00259193	0.00273101	0.00378286	0.00214941	0.00246101	0.00381471	0.0033079	0.00341639	0.0835314	-0.0455114	0.0276429	0.0119957		2.38115	-0.988367	0.56046	0.302799		0	0	0	0
171	190		2319.13	19	9.74-9.80	0.190786	0.323201	0.443911	0.576546		0.188926	0.328361	0.449687	0.578634	171	190	0.00185977	-0.00516	-0.00577624	-0.0020882	171	190	0.00119526	0.00252729	0.00343887	0.00427842	0.00185474	0.00217947	0.00288722	0.00495865	0.0353357	-0.09804	-0.109749	-0.0396757		1.45987	-2.67806	-2.22813	-0.552253		0	0	0	0
171	193		2725.37	22	10.03-10.11	0.167985	0.298719	0.423176	0.542958		0.164233	0.300433	0.423827	0.545259	171	193	0.00375227	-0.00171364	-0.000651299	-0.00230078	171	193	0.00286851	0.0029276	0.00338474	0.00304117	0.00231656	0.00308409	0.00444078	0.00432182	0.08255	-0.0377	-0.0143286	-0.0506171		1.76266	-0.697992	-0.202034	-0.754093		0	0	0	0
171	195		2985.46	24	10.71-10.78	0.157283	0.274618	0.384673	0.516536		0.154614	0.276916	0.386521	0.519605	171	195	0.00266923	-0.00229881	-0.00184869	-0.0030697	171	195	0.0060272	0.00548893	0.00455732	0.00367286	0.00658048	0.0058044	0.00465804	0.00462345	0.0640614	-0.0551714	-0.0443686	-0.0736729		0.518093	-0.49841	-0.491362	-0.90044		0	0	0	0
174	188		1688.85	14	4.08-4.12	0.250414	0.424102	0.56442	0.658607		0.24775	0.424257	0.564008	0.662129	174	188	0.00266398	-0.000154694	0.000412449	-0.00352214	174	188	0.00327888	0.00332204	0.00333663	0.00457643	0.00299622	0.0061901	0.00469357	0.00574633	0.0372957	-0.00216571	0.00577429	-0.04931		1.03883	-0.0381396	0.124053	-0.830454		0	0	0	0
175	189		1688.85	14	5.15-5.19	0.219437	0.351624	0.445685	0.55621		0.218093	0.358243	0.451849	0.561958	175	189	0.00134439	-0.00661939	-0.00616449	-0.00574847	175	189	0.00077051	0.00186592	0.00244041	0.00252092	0.00115367	0.002585	0.00317061	0.00305541	0.0188214	-0.0926714	-0.0863029	-0.0804786		1.67845	-3.59624	-2.6686	-2.51359		0	1	0	0
175	190		1791.85	15	5.83-5.88	0.210611	0.327711	0.419476	0.522905		0.208837	0.331119	0.423452	0.52569	175	190	0.0017741	-0.00340743	-0.00397552	-0.00278514	175	190	0.00674676	0.00283029	0.00646324	0.0028139	0.00873181	0.00341419	0.00642676	0.00249781	0.0266114	-0.0511114	-0.0596329	-0.0417771		0.278471	-1.33081	-0.755467	-1.2821		0	0	0	0
177	189		1461.72	12	5.16-5.20	0.218435	0.365546	0.445548	0.551888		0.231004	0.363561	0.440719	0.558868	177	189	-0.0125685	0.00198452	0.00482917	-0.00698012	177	189	0.00620464	0.00303869	0.00442488	0.00762881	0.0053375	0.002495	0.00236381	0.0162186	-0.150821	0.0238143	0.05795	-0.0837614		-2.6598	0.874241	1.66731	-0.674541		0	0	0	0
177	195		2231.05	18	8.26-8.33	0.144291	0.22998	0.306579	0.416288		0.144325	0.234298	0.302893	0.423623	177	195	-3.43651e-05	-0.00431889	0.00368556	-0.00733484	177	195	0.0126668	0.0181073	0.013209	0.0140698	0.0122437	0.0121348	0.0151568	0.0122412	-0.000618571	-0.07774	0.06634	-0.132027		-0.00337869	-0.343185	0.317513	-0.681214		0	0	0	0
189	213		2897.47	23	6.90-7.25	0.0905312	0.13718	0.193309	0.23637		0.0877027	0.142446	0.200935	0.232594	189	213	0.00282851	-0.00526615	-0.00762609	0.00377621	189	213	0.00311764	0.00311286	0.00370211	0.00430752	0.0025318	0.00426031	0.00359255	0.00344211	0.0650557	-0.121121	-0.1754	0.0868529		1.21985	-1.72869	-2.56049	1.18621		0	0	0	0
191	213		2681.37	21	6.53-6.62	0.0993401	0.148307	0.21025	0.246018		0.100751	0.156792	0.21263	0.243232	191	213	-0.00141129	-0.00848456	-0.00237986	0.00278544	191	213	0.00315265	0.00522864	0.00330803	0.00460837	0.00365844	0.00317293	0.00351381	0.00382714	-0.0296371	-0.178176	-0.0499771	0.0584943		-0.506153	-2.4028	-0.85414	0.805386		0	0	0	0
201	214		1579.82	12	7.23-7.29	0.117455	0.193595	0.312862	0.353394		0.133426	0.208295	0.305102	0.357424	201	214	-0.0159706	-0.0146996	0.00776012	-0.00403012	201	214	0.00325429	0.00314333	0.00426726	0.00664536	0.00355976	0.013	0.0076394	0.00299012	-0.191647	-0.176396	0.0931214	-0.0483614		-5.73529	-1.90364	1.53603	-0.95791		1	0	0	0
222	230		1285.77	8	5.30-5.50	0.243886	0.363093	0.351074	0.356447		0.23131	0.372765	0.360635	0.356045	222	230	0.0125755	-0.00967161	-0.00956071	0.0004025	222	230	0.00215482	0.00474446	0.00657214	0.00322607	0.00513607	0.00615839	0.0122452	0.0021575	0.100604	-0.0773729	-0.0764857	0.00322		3.91065	-2.15483	-1.19156	0.179631		1	0	0	0
222	231		1398.86	9	7.01-7.24	0.351297	0.563379	0.558979	0.551923		0.332156	0.570693	0.566401	0.56425	222	231	0.0191405	-0.00731317	-0.00742222	-0.0123268	222	231	0.0020427	0.00308698	0.00388286	0.00601508	0.00362492	0.00512762	0.00658873	0.00424286	0.172264	-0.0658186	-0.0668	-0.110941		7.96767	-2.11637	-1.68098	-2.90055		2	0	0	1
230	248		2132	16	8.58-8.62	0.34479	0.345826	0.342931	0.348994		0.363481	0.353263	0.357359	0.359339	230	248	-0.0186908	-0.00743679	-0.0144277	-0.0103457	230	248	0.0043983	0.00348027	0.00339009	0.00369455	0.00805152	0.00414955	0.00417384	0.00338179	-0.299053	-0.118989	-0.230843	-0.165531		-3.52862	-2.37838	-4.64735	-3.5777		3	0	1	1
231	247		1905.83	14	6.22-6.25	0.390967	0.389062	0.38883	0.392716		0.410205	0.402817	0.401438	0.402002	231	247	-0.0192384	-0.0137549	-0.0126079	-0.00928571	231	247	0.0013648	0.00114949	0.00245214	0.00229204	0.00224439	0.00180367	0.00393102	0.00311327	-0.269337	-0.192569	-0.17651	-0.13		-12.6855	-11.1389	-4.71332	-4.16021		3	1	1	1
248	261		1703.89	13	3.41-3.46	0.324918	0.326644	0.322218	0.325001		0.326101	0.324852	0.325215	0.324467	248	261	-0.00118275	0.00179187	-0.00299703	0.000533736	248	261	0.00188912	0.00317286	0.00561308	0.00285	0.0022333	0.00440319	0.00519242	0.0025333	-0.0153757	0.0232943	-0.0389614	0.00693857		-0.700337	0.571856	-0.678881	0.24244		0	0	0	0
249	261		1590.81	12	2.51-2.53	0.319975	0.324043	0.317011	0.318643		0.326007	0.325815	0.321934	0.323157	249	261	-0.00603202	-0.00177214	-0.00492274	-0.00451464	249	261	0.00393131	0.00392357	0.0046669	0.00406452	0.0056575	0.00477536	0.00928583	0.00561131	-0.0723843	-0.0212657	-0.0590729	-0.0541757		-1.51652	-0.496634	-0.820431	-1.12858		0	0	0	0
262	274		1404.78	11	6.45-6.48	0.70486	0.706959	0.704482	0.710474		0.724268	0.721361	0.717705	0.71993	262	274	-0.0194087	-0.0144017	-0.0132225	-0.00945623	262	274	0.00149208	0.00181156	0.00264247	0.00205208	0.00274091	0.00131727	0.00445273	0.00218844	-0.213496	-0.158419	-0.145447	-0.104019		-10.7722	-11.1366	-4.42313	-5.45947		2	1	1	1
262	275		1475.81	12	6.63-6.67	0.711042	0.710806	0.707896	0.710387		0.728764	0.724379	0.720586	0.720307	262	275	-0.0177223	-0.0135736	-0.0126894	-0.00992071	262	275	0.000839524	0.000599524	0.00174333	0.00268333	0.00324869	0.000745714	0.00366155	0.00595333	-0.212667	-0.162883	-0.152273	-0.119049		-9.14816	-24.5709	-5.41963	-2.63137		1	1	1	0
263	269		733.373	5	4.15-4.17	0.748509	0.752969	0.746328	0.752161		0.765321	0.759374	0.752063	0.757031	263	269	-0.0168126	-0.00640429	-0.00573457	-0.00487086	263	269	0.00253743	0.00212086	0.00473257	0.00327286	0.00458543	0.000548571	0.00593171	0.00364514	-0.0840629	-0.0320214	-0.0286729	-0.0243543		-5.55658	-5.06358	-1.30893	-1.72216		1	1	0	0
270	288		1911.97	18	5.32-5.38	0.540882	0.53133	0.541618	0.534887		0.560379	0.553007	0.543983	0.547471	270	288	-0.0194973	-0.0216766	-0.002365	-0.0125839	270	288	0.00670524	0.00418317	0.00759984	0.0158002	0.0019777	0.0057031	0.0101608	0.00531373	-0.350951	-0.390179	-0.04257	-0.22651		-4.83067	-5.30837	-0.322834	-1.30751		3	3	0	0
275	289		1534.67	14	4.60-4.64	0.376085	0.372752	0.375022	0.377756		0.39465	0.384912	0.384399	0.384463	275	289	-0.018565	-0.0121596	-0.00937663	-0.00670684	275	289	0.00280153	0.00153204	0.00338959	0.00294031	0.00255	0.00345214	0.00479357	0.00376388	-0.25991	-0.170234	-0.131273	-0.0938957		-8.48816	-5.57638	-2.76631	-2.43218		2	1	0	0
276	289		1463.64	13	4.53-4.57	0.36214	0.356169	0.357996	0.360068		0.378465	0.368441	0.366696	0.365731	276	289	-0.0163258	-0.012272	-0.00869978	-0.00566275	276	289	0.00290769	0.00263407	0.00318253	0.00267714	0.00322912	0.00272209	0.00532396	0.00397769	-0.212236	-0.159536	-0.113097	-0.0736157		-6.50748	-5.61149	-2.42935	-2.04563		1	1	0	0
276	296		2182.99	19	7.55-7.59	0.401144	0.399893	0.402376	0.405291		0.425323	0.421912	0.42027	0.416455	276	296	-0.0241789	-0.0220189	-0.0178935	-0.0111638	276	296	0.00591451	0.00662654	0.00609677	0.00753248	0.00618368	0.00478323	0.00527782	0.00547331	-0.459399	-0.418359	-0.339976	-0.212111		-4.89422	-4.66658	-3.84336	-2.0767		3	3	2	0
282	289		747.261	7	4.50-4.53	0.524297	0.535549	0.530524	0.536796		0.521495	0.541477	0.538125	0.541809	282	289	0.00280184	-0.00592776	-0.00760143	-0.00501327	282	289	0.0112606	0.00373857	0.00758714	0.00617612	0.0058098	0.00737	0.00570122	0.00282204	0.0196129	-0.0414943	-0.05321	-0.0350929		0.382993	-1.2424	-1.3873	-1.27877		0	0	0	0
289	318		3236.65	24	7.72-7.80	0.663106	0.690141	0.68923	0.69197		0.667649	0.692466	0.690985	0.694018	289	318	-0.00454292	-0.00232524	-0.00175595	-0.00204815	289	318	0.00189637	0.00219643	0.00191851	0.00175714	0.00256274	0.00159613	0.00268536	0.00227375	-0.10903	-0.0558057	-0.0421429	-0.0491557		-2.46812	-1.48333	-0.921559	-1.23452		0	0	0	0
290	318		3073.59	23	7.46-7.49	0.692365	0.718647	0.716832	0.719991		0.696932	0.723496	0.720998	0.723533	290	318	-0.00456677	-0.00484863	-0.00416627	-0.00354168	290	318	0.00160205	0.00228143	0.0032528	0.00226453	0.00213472	0.00185466	0.00338106	0.00290876	-0.105036	-0.111519	-0.0958243	-0.0814586		-2.9636	-2.85631	-1.53807	-1.66409		1	1	0	0
291	318		2926.52	22	7.18-7.20	0.698731	0.728889	0.725036	0.729836		0.706399	0.736989	0.733138	0.736343	291	318	-0.00766864	-0.00810019	-0.00810169	-0.00650779	291	318	0.00291753	0.00444844	0.00324175	0.00298344	0.00338812	0.00302045	0.00374468	0.00200351	-0.16871	-0.178204	-0.178237	-0.143171		-2.97069	-2.60927	-2.83318	-3.13652		1	0	1	1
300	318		2093.14	14	6.59-6.62	0.772786	0.813967	0.809408	0.817799		0.776194	0.826148	0.821837	0.827526	300	318	-0.00340796	-0.0121813	-0.0124292	-0.00972755	300	318	0.00539765	0.00815102	0.00763122	0.00523643	0.00512653	0.0114129	0.00603194	0.00861276	-0.0477114	-0.170539	-0.174009	-0.136186		-0.792935	-1.50439	-2.21316	-1.67154		0	0	0	0
304	317		1557.84	11	4.62-4.66	0.762515	0.802048	0.796279	0.799019		0.768785	0.810733	0.804186	0.804189	304	317	-0.00627013	-0.00868506	-0.00790701	-0.00516948	304	317	0.00863727	0.00834143	0.0109719	0.0100896	0.00826169	0.00751597	0.0121599	0.0105369	-0.0689714	-0.0955357	-0.0869771	-0.0568643		-0.908625	-1.33977	-0.836193	-0.613755		0	0	0	0
304	318		1686.88	12	4.71-4.75	0.69986	0.753062	0.748867	0.752145		0.703635	0.761738	0.756112	0.75637	304	318	-0.00377476	-0.00867655	-0.00724536	-0.00422452	304	318	0.00426119	0.00453798	0.00647321	0.0049019	0.00368452	0.00373083	0.00723024	0.00463024	-0.0452971	-0.104119	-0.0869443	-0.0506943		-1.16062	-2.55812	-1.29313	-1.08514		0	0	0	0
304	319		1799.97	13	5.93-5.98	0.548549	0.667642	0.702151	0.735817		0.547528	0.672379	0.709632	0.73369	304	319	0.00102121	-0.00473703	-0.00748154	0.00212725	304	319	0.00726286	0.00528747	0.00758176	0.00902275	0.00683901	0.00519209	0.00772363	0.0106021	0.0132757	-0.0615814	-0.09726	0.0276543		0.177304	-1.10719	-1.1973	0.264659		0	0	0	0
315	329		1632.86	12	4.71-4.75	0.592088	0.623729	0.625839	0.61687		0.594423	0.649056	0.6403	0.641176	315	329	-0.00233488	-0.0253273	-0.0144617	-0.0243052	315	329	0.00467286	0.00326476	0.0143382	0.00481405	0.00726381	0.00118119	0.00363357	0.00386452	-0.0280186	-0.303927	-0.17354	-0.291663		-0.468231	-12.6353	-1.69343	-6.81936		0	3	0	3
320	332		1422.77	10	5.81-5.86	0.350945	0.481549	0.605035	0.666752		0.349004	0.488055	0.606813	0.681416	320	332	0.00194029	-0.006506	-0.00177771	-0.0146646	320	332	0.00529957	0.00321943	0.00760814	0.004172	0.00283671	0.00271629	0.00417057	0.0163513	0.0194029	-0.06506	-0.0177771	-0.146646		0.559085	-2.67524	-0.354887	-1.50516		0	0	0	0
320	335		1691.95	13	7.42-7.47	0.282234	0.483015	0.607697	0.66152		0.273005	0.490129	0.614036	0.666233	320	335	0.00922978	-0.00711418	-0.00633901	-0.00471297	320	335	0.00234769	0.00262396	0.00197835	0.00251198	0.00166725	0.00268176	0.00337418	0.00282033	0.119987	-0.0924843	-0.0824071	-0.0612686		5.55186	-3.28421	-2.80706	-2.16137		1	1	1	0
321	331		1208.64	8	6.82-6.87	0.371136	0.562504	0.70432	0.767732		0.353173	0.574577	0.718049	0.777098	321	331	0.0179621	-0.0120732	-0.0137295	-0.00936589	321	331	0.00871982	0.00533679	0.00798143	0.0145038	0.00668714	0.00507339	0.0119364	0.00985821	0.143697	-0.0965857	-0.109836	-0.0749271		2.83119	-2.83989	-1.65611	-0.925032		1	1	0	0
321	332		1309.69	9	6.68-6.72	0.381779	0.555893	0.67802	0.73289		0.369905	0.564246	0.695068	0.73526	321	332	0.0118735	-0.00835333	-0.0170478	-0.00236968	321	332	0.00620365	0.00300333	0.00977349	0.00649032	0.00339841	0.00351952	0.00762095	0.00558794	0.106861	-0.07518	-0.15343	-0.0213271		2.9074	-3.1271	-2.3825	-0.47924		1	1	0	0
332	342		1121.56	10	11.41-11.43	0.51518	0.653718	0.692704	0.697409		0.511564	0.6612	0.698461	0.698296	332	342	0.00361614	-0.00748243	-0.00575714	-0.000887	332	342	0.00310729	0.002605	0.00463471	0.00534657	0.00232314	0.00286814	0.00240586	0.00268514	0.0361614	-0.0748243	-0.0575714	-0.00887		1.61438	-3.34488	-1.90957	-0.256784		0	1	0	0
333	342		1020.51	9	11.03-11.05	0.477115	0.522214	0.534083	0.532547		0.480241	0.531417	0.541791	0.541633	333	342	-0.00312524	-0.00920254	-0.00770714	-0.00908587	333	342	0.00227365	0.00138556	0.00181937	0.00322476	0.00333206	0.00217254	0.0016754	0.0014319	-0.0281271	-0.0828229	-0.0693643	-0.0817729		-1.3419	-6.18578	-5.39738	-4.46018		0	1	1	1
379	391		1556.82	12	7.53-7.58	0.175098	0.353529	0.437229	0.633033		0.163726	0.362016	0.444907	0.636715	379	391	0.0113721	-0.00848679	-0.00767857	-0.00368238	379	391	0.00702036	0.00847583	0.0105436	0.0185569	0.00566929	0.00892321	0.0114783	0.0111707	0.136466	-0.101841	-0.0921429	-0.0441886		2.18283	-1.1944	-0.853317	-0.294467		0	0	0	0
380	388		1101.61	8	10.93-10.96	0.0449823	0.0524691	0.0834546	0.223656		0.0353968	0.050377	0.0860482	0.229313	380	388	0.00958554	0.00209214	-0.00259357	-0.00565732	380	388	0.00813607	0.00756982	0.00827161	0.0109611	0.0148957	0.0101507	0.0162314	0.0117821	0.0766843	0.0167371	-0.0207486	-0.0452586		0.978187	0.286175	-0.246586	-0.608908		0	0	0	0
382	390		1117.54	8	3.98-4.01	0.232193	0.405898	0.486129	0.623264		0.215791	0.413208	0.491481	0.626775	382	390	0.016402	-0.00731	-0.00535143	-0.00351107	382	390	0.00290643	0.00323946	0.00308732	0.00314732	0.00141857	0.00140821	0.00422054	0.00345321	0.131216	-0.05848	-0.0428114	-0.0280886		8.7841	-3.58443	-1.77254	-1.30158		1	1	0	0
382	391		1230.62	9	5.95-6.00	0.205249	0.360802	0.458767	0.652469		0.191913	0.36875	0.460077	0.658301	382	391	0.0133356	-0.00794825	-0.00131048	-0.0058319	382	391	0.00813444	0.00531683	0.00365397	0.00504413	0.00360746	0.00577111	0.00392508	0.00395302	0.12002	-0.0715343	-0.0117943	-0.0524871		2.59571	-1.75442	-0.423265	-1.5762		0	0	0	0
386	393		942.573	7	7.98-8.07	0.024911	0.0844412	0.233184	0.565266		0.0210696	0.0847449	0.230687	0.565598	386	393	0.00384143	-0.000303673	0.00249714	-0.000332041	386	393	0.00316898	0.00527939	0.00600265	0.00434449	0.00207204	0.0042849	0.00381878	0.00321531	0.02689	-0.00212571	0.01748	-0.00232429		1.75729	-0.0773561	0.607946	-0.106406		0	0	0	0
392	398		757.457	5	4.69-4.72	0.559253	0.792705	0.79834	0.799474		0.544678	0.801325	0.805505	0.806588	392	398	0.0145746	-0.00862	-0.00716457	-0.00711429	392	398	0.004098	0.00363886	0.00317371	0.00331829	0.00481229	0.00412286	0.00384114	0.00517114	0.0728729	-0.0431	-0.0358229	-0.0355714		3.99382	-2.71508	-2.49052	-2.0055		1	0	0	0
392	400		969.609	7	6.94-6.96	0.349299	0.48766	0.495959	0.542752		0.343566	0.495472	0.504142	0.550111	392	400	0.00573327	-0.00781143	-0.00818286	-0.00735918	392	400	0.0037849	0.00353918	0.0036849	0.00447306	0.00363163	0.00201551	0.00220429	0.00249449	0.0401329	-0.05468	-0.05728	-0.0515143		1.89315	-3.32195	-3.30078	-2.48877		0	1	1	0
393	401		987.566	7	7.76-7.82	0.28468	0.407163	0.415038	0.46818		0.282167	0.420854	0.425045	0.47066	393	401	0.00251327	-0.0136912	-0.0100067	-0.0024802	393	401	0.00120653	0.00295388	0.000902449	0.0030049	0.000780204	0.00108061	0.00176694	0.00241061	0.0175929	-0.0958386	-0.0700471	-0.0173614		3.02969	-7.53939	-8.73572	-1.11513		1	1	1	0
395	401		773.434	5	7.76-7.82	0.307003	0.441108	0.467655	0.510197		0.312324	0.453725	0.479939	0.52071	395	401	-0.00532086	-0.0126171	-0.012284	-0.0105137	395	401	0.00475343	0.006516	0.00675371	0.00404343	0.00388657	0.003726	0.00565143	0.00583686	-0.0266043	-0.0630857	-0.06142	-0.0525686		-1.50096	-2.91144	-2.41605	-2.56462		0	1	0	0

## Sheet: DynamX_Data
Protein	Start	End	Sequence	Modification	Fragment	MaxUptake	MHP	State	Exposure	Center	Center SD	Uptake	Uptake SD	RT	RT SD				CORRECTED RESIDUE NUMBERS
Deptor	-2	13	GSHMEEGGSTGSAGSD			15	1465.55	Deptor FRB	0	1466.42	0.006043	0	0	3.6978	0.007908				-2	13
Deptor	-2	13	GSHMEEGGSTGSAGSD			15	1465.55	Deptor FRB	0.05	1471.95	0.027946	5.52845	0.028592	3.71123	0.010888				-2	13
Deptor	-2	13	GSHMEEGGSTGSAGSD			15	1465.55	Deptor FRB	0.5	1471.9	0.017629	5.48426	0.018636	3.71618	0.003296				-2	13
Deptor	-2	13	GSHMEEGGSTGSAGSD			15	1465.55	Deptor FRB	5	1471.84	0.063868	5.425	0.064153	3.70547	0.006992				-2	13
Deptor	-2	13	GSHMEEGGSTGSAGSD			15	1465.55	Deptor FRB	50	1471.83	0.033716	5.41524	0.034254	3.68012	0.020656				-2	13
Deptor	-2	13	GSHMEEGGSTGSAGSD			15	1465.55	Deptor alone	0	1466.42	0.006043	0	0	3.6978	0.007908				-2	13
Deptor	-2	13	GSHMEEGGSTGSAGSD			15	1465.55	Deptor alone	0.05	1472.08	0.024404	5.66254	0.025141	3.71494	0.009659				-2	13
Deptor	-2	13	GSHMEEGGSTGSAGSD			15	1465.55	Deptor alone	0.5	1472.01	0.008177	5.58876	0.010168	3.68508	0.043				-2	13
Deptor	-2	13	GSHMEEGGSTGSAGSD			15	1465.55	Deptor alone	5	1471.92	0.087763	5.49785	0.087971	3.70784	0.011494				-2	13
Deptor	-2	13	GSHMEEGGSTGSAGSD			15	1465.55	Deptor alone	50	1471.94	0.088446	5.51646	0.088652	3.69605	0.007827				-2	13
Deptor	-2	26	GSHMEEGGSTGSAGSDSSTSGSGGAQQRE			28	2698.09	Deptor FRB	0	2699.58	0.012536	0	0	3.76334	0.006505				-2	26
Deptor	-2	26	GSHMEEGGSTGSAGSDSSTSGSGGAQQRE			28	2698.09	Deptor FRB	0.05	2712.46	0.103415	12.881	0.104172	3.77733	0.004362				-2	26
Deptor	-2	26	GSHMEEGGSTGSAGSDSSTSGSGGAQQRE			28	2698.09	Deptor FRB	0.5	2712.5	0.035665	12.9156	0.037804	3.77448	0.002386				-2	26
Deptor	-2	26	GSHMEEGGSTGSAGSDSSTSGSGGAQQRE			28	2698.09	Deptor FRB	5	2712.42	0.063091	12.8372	0.064325	3.76894	0.002099				-2	26
Deptor	-2	26	GSHMEEGGSTGSAGSDSSTSGSGGAQQRE			28	2698.09	Deptor FRB	50	2712.42	0.047665	12.834	0.049286	3.76292	0.004				-2	26
Deptor	-2	26	GSHMEEGGSTGSAGSDSSTSGSGGAQQRE			28	2698.09	Deptor alone	0	2699.58	0.012536	0	0	3.76334	0.006505				-2	26
Deptor	-2	26	GSHMEEGGSTGSAGSDSSTSGSGGAQQRE			28	2698.09	Deptor alone	0.05	2712.67	0.107122	13.0907	0.107853	3.77835	0.004975				-2	26
Deptor	-2	26	GSHMEEGGSTGSAGSDSSTSGSGGAQQRE			28	2698.09	Deptor alone	0.5	2712.61	0.014875	13.0237	0.019453	3.76975	0.007766				-2	26
Deptor	-2	26	GSHMEEGGSTGSAGSDSSTSGSGGAQQRE			28	2698.09	Deptor alone	5	2712.48	0.148984	12.9015	0.14951	3.76713	0.006224				-2	26
Deptor	-2	26	GSHMEEGGSTGSAGSDSSTSGSGGAQQRE			28	2698.09	Deptor alone	50	2712.57	0.128947	12.9858	0.129555	3.76588	0.00613				-2	26
Deptor	-2	27	GSHMEEGGSTGSAGSDSSTSGSGGAQQREL			29	2811.17	Deptor FRB	0	2812.73	0.013745	0	0	4.73755	0.012836				-2	27
Deptor	-2	27	GSHMEEGGSTGSAGSDSSTSGSGGAQQREL			29	2811.17	Deptor FRB	0.05	2824.68	0.078329	11.9507	0.079525	4.75737	0.003851				-2	27
Deptor	-2	27	GSHMEEGGSTGSAGSDSSTSGSGGAQQREL			29	2811.17	Deptor FRB	0.5	2824.7	0.029248	11.9704	0.032317	4.7477	0.002118				-2	27
Deptor	-2	27	GSHMEEGGSTGSAGSDSSTSGSGGAQQREL			29	2811.17	Deptor FRB	5	2824.61	0.016842	11.8825	0.021739	4.74192	0.003353				-2	27
Deptor	-2	27	GSHMEEGGSTGSAGSDSSTSGSGGAQQREL			29	2811.17	Deptor FRB	50	2824.66	0.0537	11.9237	0.055431	4.73546	0.003477				-2	27
Deptor	-2	27	GSHMEEGGSTGSAGSDSSTSGSGGAQQREL			29	2811.17	Deptor alone	0	2812.73	0.013745	0	0	4.73755	0.012836				-2	27
Deptor	-2	27	GSHMEEGGSTGSAGSDSSTSGSGGAQQREL			29	2811.17	Deptor alone	0.05	2824.92	0.104694	12.185	0.105593	4.76302	0.004927				-2	27
Deptor	-2	27	GSHMEEGGSTGSAGSDSSTSGSGGAQQREL			29	2811.17	Deptor alone	0.5	2824.83	0.011411	12.1008	0.017864	4.75011	0.006665				-2	27
Deptor	-2	27	GSHMEEGGSTGSAGSDSSTSGSGGAQQREL			29	2811.17	Deptor alone	5	2824.72	0.098566	11.9872	0.09952	4.74783	0.004447				-2	27
Deptor	-2	27	GSHMEEGGSTGSAGSDSSTSGSGGAQQREL			29	2811.17	Deptor alone	50	2824.78	0.115023	12.0517	0.115842	4.74298	0.00728				-2	27
Deptor	-2	28	GSHMEEGGSTGSAGSDSSTSGSGGAQQRELE			30	2940.21	Deptor FRB	0	2941.84	0.011356	0	0	4.57074	0.023337				-2	28
Deptor	-2	28	GSHMEEGGSTGSAGSDSSTSGSGGAQQRELE			30	2940.21	Deptor FRB	0.05	2954.66	0.087239	12.8267	0.087975	4.59379	0.004289				-2	28
Deptor	-2	28	GSHMEEGGSTGSAGSDSSTSGSGGAQQRELE			30	2940.21	Deptor FRB	0.5	2954.73	0.016632	12.8915	0.020139	4.58837	0.001295				-2	28
Deptor	-2	28	GSHMEEGGSTGSAGSDSSTSGSGGAQQRELE			30	2940.21	Deptor FRB	5	2954.65	0.028171	12.8104	0.030373	4.58668	0.003445				-2	28
Deptor	-2	28	GSHMEEGGSTGSAGSDSSTSGSGGAQQRELE			30	2940.21	Deptor FRB	50	2954.68	0.054982	12.847	0.056142	4.58117	0.003543				-2	28
Deptor	-2	28	GSHMEEGGSTGSAGSDSSTSGSGGAQQRELE			30	2940.21	Deptor alone	0	2941.84	0.011356	0	0	4.57074	0.023337				-2	28
Deptor	-2	28	GSHMEEGGSTGSAGSDSSTSGSGGAQQRELE			30	2940.21	Deptor alone	0.05	2954.93	0.13833	13.0963	0.138795	4.59839	0.004878				-2	28
Deptor	-2	28	GSHMEEGGSTGSAGSDSSTSGSGGAQQRELE			30	2940.21	Deptor alone	0.5	2954.87	0.02719	13.0358	0.029466	4.58507	0.005576				-2	28
Deptor	-2	28	GSHMEEGGSTGSAGSDSSTSGSGGAQQRELE			30	2940.21	Deptor alone	5	2954.75	0.110491	12.9111	0.111073	4.58681	0.003334				-2	28
Deptor	-2	28	GSHMEEGGSTGSAGSDSSTSGSGGAQQRELE			30	2940.21	Deptor alone	50	2954.77	0.124555	12.933	0.125072	4.58428	0.007296				-2	28
Deptor	-2	30	GSHMEEGGSTGSAGSDSSTSGSGGAQQRELERM			32	3227.36	Deptor FRB	0	3229.18	0.015629	0	0	5.57569	0.006871				-2	30
Deptor	-2	30	GSHMEEGGSTGSAGSDSSTSGSGGAQQRELERM			32	3227.36	Deptor FRB	0.05	3240.59	0.062778	11.4093	0.064694	5.55916	0.004288				-2	30
Deptor	-2	30	GSHMEEGGSTGSAGSDSSTSGSGGAQQRELERM			32	3227.36	Deptor FRB	0.5	3240.57	0.043211	11.3901	0.045951	5.54936	0.001876				-2	30
Deptor	-2	30	GSHMEEGGSTGSAGSDSSTSGSGGAQQRELERM			32	3227.36	Deptor FRB	5	3240.49	0.088896	11.3089	0.09026	5.54867	0.002792				-2	30
Deptor	-2	30	GSHMEEGGSTGSAGSDSSTSGSGGAQQRELERM			32	3227.36	Deptor FRB	50	3240.55	0.074804	11.3723	0.076419	5.54144	0.004112				-2	30
Deptor	-2	30	GSHMEEGGSTGSAGSDSSTSGSGGAQQRELERM			32	3227.36	Deptor alone	0	3229.18	0.015629	0	0	5.57569	0.006871				-2	30
Deptor	-2	30	GSHMEEGGSTGSAGSDSSTSGSGGAQQRELERM			32	3227.36	Deptor alone	0.05	3240.98	0.072697	11.7972	0.074358	5.57168	0.004744				-2	30
Deptor	-2	30	GSHMEEGGSTGSAGSDSSTSGSGGAQQRELERM			32	3227.36	Deptor alone	0.5	3240.88	0.059099	11.6954	0.06113	5.5544	0.005392				-2	30
Deptor	-2	30	GSHMEEGGSTGSAGSDSSTSGSGGAQQRELERM			32	3227.36	Deptor alone	5	3240.76	0.134188	11.577	0.135095	5.55558	0.003222				-2	30
Deptor	-2	30	GSHMEEGGSTGSAGSDSSTSGSGGAQQRELERM			32	3227.36	Deptor alone	50	3240.79	0.083627	11.6082	0.085075	5.5505	0.007605				-2	30
Deptor	-2	32	GSHMEEGGSTGSAGSDSSTSGSGGAQQRELERMAE			34	3427.44	Deptor FRB	0	3429.36	0.008596	0	0	6.14679	0.006904				-2	32
Deptor	-2	32	GSHMEEGGSTGSAGSDSSTSGSGGAQQRELERMAE			34	3427.44	Deptor FRB	0.05	3441.17	0.051368	11.8165	0.052082	6.11116	0.00513				-2	32
Deptor	-2	32	GSHMEEGGSTGSAGSDSSTSGSGGAQQRELERMAE			34	3427.44	Deptor FRB	0.5	3441.23	0.062421	11.8748	0.06301	6.10229	0.001431				-2	32
Deptor	-2	32	GSHMEEGGSTGSAGSDSSTSGSGGAQQRELERMAE			34	3427.44	Deptor FRB	5	3441.16	0.069774	11.8062	0.070301	6.1043	0.002277				-2	32
Deptor	-2	32	GSHMEEGGSTGSAGSDSSTSGSGGAQQRELERMAE			34	3427.44	Deptor FRB	50	3441.23	0.063647	11.8759	0.064224	6.09803	0.003337				-2	32
Deptor	-2	32	GSHMEEGGSTGSAGSDSSTSGSGGAQQRELERMAE			34	3427.44	Deptor alone	0	3429.36	0.008596	0	0	6.14679	0.006904				-2	32
Deptor	-2	32	GSHMEEGGSTGSAGSDSSTSGSGGAQQRELERMAE			34	3427.44	Deptor alone	0.05	3441.58	0.075055	12.2226	0.075545	6.12971	0.005792				-2	32
Deptor	-2	32	GSHMEEGGSTGSAGSDSSTSGSGGAQQRELERMAE			34	3427.44	Deptor alone	0.5	3441.6	0.048968	12.2373	0.049717	6.11364	0.005738				-2	32
Deptor	-2	32	GSHMEEGGSTGSAGSDSSTSGSGGAQQRELERMAE			34	3427.44	Deptor alone	5	3441.49	0.136563	12.1364	0.136833	6.1185	0.00326				-2	32
Deptor	-2	32	GSHMEEGGSTGSAGSDSSTSGSGGAQQRELERMAE			34	3427.44	Deptor alone	50	3441.56	0.0832	12.2047	0.083643	6.11346	0.007486				-2	32
Deptor	2	30	EEGGSTGSAGSDSSTSGSGGAQQRELERM			28	2815.2	Deptor FRB	0	2816.77	0.007923	0	0	5.81765	0.006021				2	30
Deptor	2	30	EEGGSTGSAGSDSSTSGSGGAQQRELERM			28	2815.2	Deptor FRB	0.05	2827.23	0.095977	10.4571	0.096304	5.79906	0.003511				2	30
Deptor	2	30	EEGGSTGSAGSDSSTSGSGGAQQRELERM			28	2815.2	Deptor FRB	0.5	2827.27	0.024968	10.5	0.026195	5.79089	0.00136				2	30
Deptor	2	30	EEGGSTGSAGSDSSTSGSGGAQQRELERM			28	2815.2	Deptor FRB	5	2827.19	0.079749	10.4176	0.080141	5.79068	0.002843				2	30
Deptor	2	30	EEGGSTGSAGSDSSTSGSGGAQQRELERM			28	2815.2	Deptor FRB	50	2827.23	0.03644	10.461	0.037291	5.78278	0.003565				2	30
Deptor	2	30	EEGGSTGSAGSDSSTSGSGGAQQRELERM			28	2815.2	Deptor alone	0	2816.77	0.007923	0	0	5.81765	0.006021				2	30
Deptor	2	30	EEGGSTGSAGSDSSTSGSGGAQQRELERM			28	2815.2	Deptor alone	0.05	2827.67	0.08788	10.8968	0.088237	5.81167	0.00554				2	30
Deptor	2	30	EEGGSTGSAGSDSSTSGSGGAQQRELERM			28	2815.2	Deptor alone	0.5	2827.55	0.064453	10.7735	0.064938	5.79682	0.005222				2	30
Deptor	2	30	EEGGSTGSAGSDSSTSGSGGAQQRELERM			28	2815.2	Deptor alone	5	2827.49	0.134528	10.7154	0.134761	5.79882	0.002973				2	30
Deptor	2	30	EEGGSTGSAGSDSSTSGSGGAQQRELERM			28	2815.2	Deptor alone	50	2827.51	0.076372	10.7397	0.076781	5.79416	0.007321				2	30
Deptor	2	32	EEGGSTGSAGSDSSTSGSGGAQQRELERMAE			30	3015.28	Deptor FRB	0	3016.99	0.019089	0	0	6.42539	0.005523				2	32
Deptor	2	32	EEGGSTGSAGSDSSTSGSGGAQQRELERMAE			30	3015.28	Deptor FRB	0.05	3028.32	0.021438	11.3264	0.028705	6.38833	0.004943				2	32
Deptor	2	32	EEGGSTGSAGSDSSTSGSGGAQQRELERMAE			30	3015.28	Deptor FRB	0.5	3028.5	0.067188	11.5027	0.069847	6.38146	0.002032				2	32
Deptor	2	32	EEGGSTGSAGSDSSTSGSGGAQQRELERMAE			30	3015.28	Deptor FRB	5	3028.42	0.059278	11.4301	0.062276	6.38602	0.002681				2	32
Deptor	2	32	EEGGSTGSAGSDSSTSGSGGAQQRELERMAE			30	3015.28	Deptor FRB	50	3028.47	0.081014	11.4787	0.083232	6.38102	0.003329				2	32
Deptor	2	32	EEGGSTGSAGSDSSTSGSGGAQQRELERMAE			30	3015.28	Deptor alone	0	3016.99	0.019089	0	0	6.42539	0.005523				2	32
Deptor	2	32	EEGGSTGSAGSDSSTSGSGGAQQRELERMAE			30	3015.28	Deptor alone	0.05	3028.76	0.111014	11.7708	0.112643	6.40135	0.00716				2	32
Deptor	2	32	EEGGSTGSAGSDSSTSGSGGAQQRELERMAE			30	3015.28	Deptor alone	0.5	3028.7	0.044105	11.7056	0.048058	6.38762	0.008415				2	32
Deptor	2	32	EEGGSTGSAGSDSSTSGSGGAQQRELERMAE			30	3015.28	Deptor alone	5	3028.59	0.099108	11.5953	0.10093	6.39185	0.003157				2	32
Deptor	2	32	EEGGSTGSAGSDSSTSGSGGAQQRELERMAE			30	3015.28	Deptor alone	50	3028.58	0.013722	11.5831	0.023509	6.38799	0.007201				2	32
Deptor	11	30	GSDSSTSGSGGAQQRELERM			19	2039.9	Deptor FRB	0	2041.07	0.004554	0	0	5.57625	0.007281				11	30
Deptor	11	30	GSDSSTSGSGGAQQRELERM			19	2039.9	Deptor FRB	0.05	2049.54	0.048947	8.4658	0.049159	5.55929	0.004758				11	30
Deptor	11	30	GSDSSTSGSGGAQQRELERM			19	2039.9	Deptor FRB	0.5	2049.47	0.050811	8.40178	0.051014	5.54982	0.001621				11	30
Deptor	11	30	GSDSSTSGSGGAQQRELERM			19	2039.9	Deptor FRB	5	2049.43	0.023459	8.3613	0.023897	5.54896	0.002967				11	30
Deptor	11	30	GSDSSTSGSGGAQQRELERM			19	2039.9	Deptor FRB	50	2049.47	0.030175	8.39333	0.030517	5.54176	0.003789				11	30
Deptor	11	30	GSDSSTSGSGGAQQRELERM			19	2039.9	Deptor alone	0	2041.07	0.004554	0	0	5.57625	0.007281				11	30
Deptor	11	30	GSDSSTSGSGGAQQRELERM			19	2039.9	Deptor alone	0.05	2049.81	0.042166	8.73507	0.042411	5.57198	0.004956				11	30
Deptor	11	30	GSDSSTSGSGGAQQRELERM			19	2039.9	Deptor alone	0.5	2049.75	0.030243	8.6728	0.030585	5.55563	0.00609				11	30
Deptor	11	30	GSDSSTSGSGGAQQRELERM			19	2039.9	Deptor alone	5	2049.69	0.084871	8.61644	0.084993	5.5561	0.003976				11	30
Deptor	11	30	GSDSSTSGSGGAQQRELERM			19	2039.9	Deptor alone	50	2049.7	0.0179	8.63093	0.01847	5.55075	0.008088				11	30
Deptor	40	46	LRLRLHE			6	936.574	Deptor FRB	0	937.056	0.006761	0	0	5.4838	0.009926				40	46
Deptor	40	46	LRLRLHE			6	936.574	Deptor FRB	0.05	937.232	0.007423	0.176065	0.010041	5.46631	0.002522				40	46
Deptor	40	46	LRLRLHE			6	936.574	Deptor FRB	0.5	937.686	0.019861	0.629381	0.02098	5.44386	0.002028				40	46
Deptor	40	46	LRLRLHE			6	936.574	Deptor FRB	5	938.947	0.021487	1.89085	0.022525	5.43196	0.004221				40	46
Deptor	40	46	LRLRLHE			6	936.574	Deptor FRB	50	939.089	0.021195	2.0324	0.022248	5.41945	0.004774				40	46
Deptor	40	46	LRLRLHE			6	936.574	Deptor alone	0	937.056	0.006761	0	0	5.4838	0.009926				40	46
Deptor	40	46	LRLRLHE			6	936.574	Deptor alone	0.05	937.226	0.003234	0.170138	0.007495	5.49597	0.000979				40	46
Deptor	40	46	LRLRLHE			6	936.574	Deptor alone	0.5	937.725	0.022506	0.669241	0.0235	5.46593	0.006655				40	46
Deptor	40	46	LRLRLHE			6	936.574	Deptor alone	5	938.976	0.022705	1.91948	0.023691	5.45502	0.004568				40	46
Deptor	40	46	LRLRLHE			6	936.574	Deptor alone	50	939.102	0.018987	2.04609	0.020155	5.4433	0.006894				40	46
Deptor	43	64	RLHEEKVIKDRRHHLKTYPNCF			20	2819.5	Deptor FRB	0	2821.2	0.021355	0	0	5.29636	0.016065				43	64
Deptor	43	64	RLHEEKVIKDRRHHLKTYPNCF			20	2819.5	Deptor FRB	0.05	2822.82	0.010207	1.61898	0.023669	5.23816	0.00505				43	64
Deptor	43	64	RLHEEKVIKDRRHHLKTYPNCF			20	2819.5	Deptor FRB	0.5	2824.21	0.052307	3.00873	0.056499	5.19501	0.000609				43	64
Deptor	43	64	RLHEEKVIKDRRHHLKTYPNCF			20	2819.5	Deptor FRB	5	2826.14	0.059323	4.93177	0.06305	5.17406	0.007366				43	64
Deptor	43	64	RLHEEKVIKDRRHHLKTYPNCF			20	2819.5	Deptor FRB	50	2826.46	0.046023	5.25696	0.050737	5.15578	0.006254				43	64
Deptor	43	64	RLHEEKVIKDRRHHLKTYPNCF			20	2819.5	Deptor alone	0	2821.2	0.021355	0	0	5.29636	0.016065				43	64
Deptor	43	64	RLHEEKVIKDRRHHLKTYPNCF			20	2819.5	Deptor alone	0.05	2822.8	0.010824	1.59486	0.023942	5.28095	0.005269				43	64
Deptor	43	64	RLHEEKVIKDRRHHLKTYPNCF			20	2819.5	Deptor alone	0.5	2824.28	0.062733	3.08036	0.066268	5.23256	0.012219				43	64
Deptor	43	64	RLHEEKVIKDRRHHLKTYPNCF			20	2819.5	Deptor alone	5	2826.26	0.123932	5.05416	0.125758	5.21088	0.00811				43	64
Deptor	43	64	RLHEEKVIKDRRHHLKTYPNCF			20	2819.5	Deptor alone	50	2826.55	0.0754	5.34477	0.078366	5.1889	0.005464				43	64
Deptor	47	63	EKVIKDRRHHLKTYPNC			15	2137.14	Deptor FRB	0	2138.5	0.020496	0	0	3.89444	0.012127				47	63
Deptor	47	63	EKVIKDRRHHLKTYPNC			15	2137.14	Deptor FRB	0.05	2139.92	0.042115	1.4183	0.046838	3.87106	0.006156				47	63
Deptor	47	63	EKVIKDRRHHLKTYPNC			15	2137.14	Deptor FRB	0.5	2141.06	0.092685	2.56273	0.094924	3.84498	0.003055				47	63
Deptor	47	63	EKVIKDRRHHLKTYPNC			15	2137.14	Deptor FRB	5	2142.33	0.15659	3.83326	0.157926	3.82097	0.004639				47	63
Deptor	47	63	EKVIKDRRHHLKTYPNC			15	2137.14	Deptor FRB	50	2142.52	0.17054	4.01823	0.171767	3.80501	0.003856				47	63
Deptor	47	63	EKVIKDRRHHLKTYPNC			15	2137.14	Deptor alone	0	2138.5	0.020496	0	0	3.89444	0.012127				47	63
Deptor	47	63	EKVIKDRRHHLKTYPNC			15	2137.14	Deptor alone	0.05	2139.94	0.042362	1.43589	0.04706	3.89622	0.004325				47	63
Deptor	47	63	EKVIKDRRHHLKTYPNC			15	2137.14	Deptor alone	0.5	2141.12	0.078207	2.61571	0.080848	3.86274	0.013413				47	63
Deptor	47	63	EKVIKDRRHHLKTYPNC			15	2137.14	Deptor alone	5	2142.4	0.177559	3.89954	0.178738	3.84051	0.007255				47	63
Deptor	47	63	EKVIKDRRHHLKTYPNC			15	2137.14	Deptor alone	50	2142.57	0.163397	4.065	0.164678	3.82326	0.006403				47	63
Deptor	64	85	FVAKELIDWLIEHKEASDRETA			21	2600.34	Deptor FRB	0	2601.92	0.022457	0	0	10.1304	0.003959				64	85
Deptor	64	85	FVAKELIDWLIEHKEASDRETA			21	2600.34	Deptor FRB	0.05	2603.64	0.021522	1.71736	0.031105	10.1337	0.009423				64	85
Deptor	64	85	FVAKELIDWLIEHKEASDRETA			21	2600.34	Deptor FRB	0.5	2605.15	0.047237	3.22736	0.052303	10.1072	0.0008				64	85
Deptor	64	85	FVAKELIDWLIEHKEASDRETA			21	2600.34	Deptor FRB	5	2606.66	0.064848	4.74357	0.068627	10.1042	0.006426				64	85
Deptor	64	85	FVAKELIDWLIEHKEASDRETA			21	2600.34	Deptor FRB	50	2609.04	0.111982	7.12377	0.114212	10.093	0.006721				64	85
Deptor	64	85	FVAKELIDWLIEHKEASDRETA			21	2600.34	Deptor alone	0	2601.92	0.022457	0	0	10.1304	0.003959				64	85
Deptor	64	85	FVAKELIDWLIEHKEASDRETA			21	2600.34	Deptor alone	0.05	2603.52	0.010979	1.60092	0.024997	10.1442	0.003221				64	85
Deptor	64	85	FVAKELIDWLIEHKEASDRETA			21	2600.34	Deptor alone	0.5	2605.15	0.03765	3.23115	0.043839	10.113	0.009277				64	85
Deptor	64	85	FVAKELIDWLIEHKEASDRETA			21	2600.34	Deptor alone	5	2606.66	0.041229	4.73696	0.046948	10.1126	0.005697				64	85
Deptor	64	85	FVAKELIDWLIEHKEASDRETA			21	2600.34	Deptor alone	50	2609	0.176097	7.08095	0.177524	10.0993	0.007293				64	85
Deptor	65	75	VAKELIDWLIE			10	1328.75	Deptor FRB	0	1329.51	0.007679	0	0	11.475	0.003515				65	75
Deptor	65	75	VAKELIDWLIE			10	1328.75	Deptor FRB	0.05	1329.83	0.053376	0.321644	0.053926	11.4974	0.006152				65	75
Deptor	65	75	VAKELIDWLIE			10	1328.75	Deptor FRB	0.5	1330.05	0.035567	0.541534	0.036386	11.4844	0.001368				65	75
Deptor	65	75	VAKELIDWLIE			10	1328.75	Deptor FRB	5	1330.49	0.05182	0.983761	0.052386	11.4851	0.005283				65	75
Deptor	65	75	VAKELIDWLIE			10	1328.75	Deptor FRB	50	1331.81	0.088214	2.30202	0.088547	11.4686	0.006299				65	75
Deptor	65	75	VAKELIDWLIE			10	1328.75	Deptor alone	0	1329.51	0.007679	0	0	11.475	0.003515				65	75
Deptor	65	75	VAKELIDWLIE			10	1328.75	Deptor alone	0.05	1329.74	0.023111	0.232539	0.024353	11.5069	0.00504				65	75
Deptor	65	75	VAKELIDWLIE			10	1328.75	Deptor alone	0.5	1330.1	0.023216	0.591803	0.024453	11.4852	0.006592				65	75
Deptor	65	75	VAKELIDWLIE			10	1328.75	Deptor alone	5	1330.48	0.045465	0.97115	0.046109	11.481	0.006633				65	75
Deptor	65	75	VAKELIDWLIE			10	1328.75	Deptor alone	50	1331.85	0.024385	2.33449	0.025566	11.4731	0.006953				65	75
Deptor	66	72	AKELIDW			6	874.467	Deptor FRB	0	875.005	0.030383	0	0	10.1226	0.001754				66	72
Deptor	66	72	AKELIDW			6	874.467	Deptor FRB	0.05	875.553	0.03488	0.548343	0.046258	10.1399	0.007562				66	72
Deptor	66	72	AKELIDW			6	874.467	Deptor FRB	0.5	875.979	0.040422	0.974123	0.050568	10.1248	0.001158				66	72
Deptor	66	72	AKELIDW			6	874.467	Deptor FRB	5	876.299	0.033898	1.29432	0.045522	10.1234	0.007414				66	72
Deptor	66	72	AKELIDW			6	874.467	Deptor FRB	50	877.019	0.038931	2.01403	0.049383	10.1148	0.007505				66	72
Deptor	66	72	AKELIDW			6	874.467	Deptor alone	0	875.005	0.030383	0	0	10.1226	0.001754				66	72
Deptor	66	72	AKELIDW			6	874.467	Deptor alone	0.05	875.463	0.023442	0.45852	0.038375	10.1494	0.003912				66	72
Deptor	66	72	AKELIDW			6	874.467	Deptor alone	0.5	876.005	0.021821	1	0.037407	10.127	0.006328				66	72
Deptor	66	72	AKELIDW			6	874.467	Deptor alone	5	876.313	0.029682	1.30798	0.042475	10.1331	0.005167				66	72
Deptor	66	72	AKELIDW			6	874.467	Deptor alone	50	877.022	0.051377	2.0172	0.059688	10.1208	0.007467				66	72
Deptor	66	73	AKELIDWL			7	987.551	Deptor FRB	0	988.101	0.001475	0	0	10.9128	0.003827				66	73
Deptor	66	73	AKELIDWL			7	987.551	Deptor FRB	0.05	988.365	0.016035	0.263706	0.016103	10.9374	0.006669				66	73
Deptor	66	73	AKELIDWL			7	987.551	Deptor FRB	0.5	988.525	0.004313	0.423991	0.004558	10.9218	0.000768				66	73
Deptor	66	73	AKELIDWL			7	987.551	Deptor FRB	5	988.801	0.021858	0.699444	0.021908	10.9226	0.006225				66	73
Deptor	66	73	AKELIDWL			7	987.551	Deptor FRB	50	989.73	0.007929	1.62839	0.008065	10.912	0.006828				66	73
Deptor	66	73	AKELIDWL			7	987.551	Deptor alone	0	988.101	0.001475	0	0	10.9128	0.003827				66	73
Deptor	66	73	AKELIDWL			7	987.551	Deptor alone	0.05	988.339	0.002065	0.237738	0.002538	10.9465	0.003921				66	73
Deptor	66	73	AKELIDWL			7	987.551	Deptor alone	0.5	988.52	0.00234	0.418437	0.002766	10.9238	0.006087				66	73
Deptor	66	73	AKELIDWL			7	987.551	Deptor alone	5	988.813	0.029418	0.711387	0.029455	10.932	0.00735				66	73
Deptor	66	73	AKELIDWL			7	987.551	Deptor alone	50	989.748	0.010582	1.6472	0.010685	10.9177	0.007328				66	73
Deptor	67	73	KELIDWL			6	916.514	Deptor FRB	0	917.056	0.005341	0	0	10.7185	0.003122				67	73
Deptor	67	73	KELIDWL			6	916.514	Deptor FRB	0.05	917.092	0.016572	0.036272	0.017412	10.7412	0.007368				67	73
Deptor	67	73	KELIDWL			6	916.514	Deptor FRB	0.5	917.097	0.005432	0.04149	0.007618	10.727	0.001048				67	73
Deptor	67	73	KELIDWL			6	916.514	Deptor FRB	5	917.216	0.004162	0.160111	0.006771	10.7268	0.006223				67	73
Deptor	67	73	KELIDWL			6	916.514	Deptor FRB	50	917.849	0.026771	0.793612	0.027299	10.7152	0.006088				67	73
Deptor	67	73	KELIDWL			6	916.514	Deptor alone	0	917.056	0.005341	0	0	10.7185	0.003122				67	73
Deptor	67	73	KELIDWL			6	916.514	Deptor alone	0.05	917.077	0.002838	0.021056	0.006048	10.7488	0.004893				67	73
Deptor	67	73	KELIDWL			6	916.514	Deptor alone	0.5	917.102	0.002626	0.046004	0.005951	10.7278	0.006285				67	73
Deptor	67	73	KELIDWL			6	916.514	Deptor alone	5	917.215	0.027894	0.159428	0.0284	10.7347	0.006874				67	73
Deptor	67	73	KELIDWL			6	916.514	Deptor alone	50	917.859	0.011615	0.803916	0.012784	10.7207	0.007284				67	73
Deptor	73	85	LIEHKEASDRETA			12	1498.75	Deptor FRB	0	1499.53	0.013542	0	0	3.57816	0.00917				73	85
Deptor	73	85	LIEHKEASDRETA			12	1498.75	Deptor FRB	0.05	1501	0.024783	1.46906	0.028241	3.59655	0.00612				73	85
Deptor	73	85	LIEHKEASDRETA			12	1498.75	Deptor FRB	0.5	1501.92	0.02049	2.38198	0.024561	3.58695	0.00315				73	85
Deptor	73	85	LIEHKEASDRETA			12	1498.75	Deptor FRB	5	1502.5	0.074571	2.96448	0.07579	3.56929	0.009824				73	85
Deptor	73	85	LIEHKEASDRETA			12	1498.75	Deptor FRB	50	1503.37	0.077319	3.83353	0.078496	3.57441	0.004564				73	85
Deptor	73	85	LIEHKEASDRETA			12	1498.75	Deptor alone	0	1499.53	0.013542	0	0	3.57816	0.00917				73	85
Deptor	73	85	LIEHKEASDRETA			12	1498.75	Deptor alone	0.05	1500.95	0.022305	1.41599	0.026094	3.59503	0.009765				73	85
Deptor	73	85	LIEHKEASDRETA			12	1498.75	Deptor alone	0.5	1501.94	0.051634	2.40411	0.053381	3.594	0.005513				73	85
Deptor	73	85	LIEHKEASDRETA			12	1498.75	Deptor alone	5	1502.55	0.044369	3.01485	0.04639	3.58748	0.005132				73	85
Deptor	73	85	LIEHKEASDRETA			12	1498.75	Deptor alone	50	1503.34	0.077723	3.81068	0.078894	3.57983	0.006021				73	85
Deptor	74	85	IEHKEASDRETA			11	1385.67	Deptor FRB	0	1386.33	0.004507	0	0	2.51783	0.006649				74	85
Deptor	74	85	IEHKEASDRETA			11	1385.67	Deptor FRB	0.05	1387.81	0.003878	1.47805	0.005946	2.51582	0.002765				74	85
Deptor	74	85	IEHKEASDRETA			11	1385.67	Deptor FRB	0.5	1388.79	0.018092	2.45383	0.018645	2.52606	0.001438				74	85
Deptor	74	85	IEHKEASDRETA			11	1385.67	Deptor FRB	5	1389.37	0.027766	3.03687	0.028129	2.51074	0.004835				74	85
Deptor	74	85	IEHKEASDRETA			11	1385.67	Deptor FRB	50	1390	0.007523	3.66265	0.00877	2.5125	0.002921				74	85
Deptor	74	85	IEHKEASDRETA			11	1385.67	Deptor alone	0	1386.33	0.004507	0	0	2.51783	0.006649				74	85
Deptor	74	85	IEHKEASDRETA			11	1385.67	Deptor alone	0.05	1387.8	0.024568	1.46708	0.024978	2.51956	0.005208				74	85
Deptor	74	85	IEHKEASDRETA			11	1385.67	Deptor alone	0.5	1388.79	0.018132	2.45449	0.018684	2.52244	0.005115				74	85
Deptor	74	85	IEHKEASDRETA			11	1385.67	Deptor alone	5	1389.4	0.037982	3.06891	0.038248	2.51871	0.004557				74	85
Deptor	74	85	IEHKEASDRETA			11	1385.67	Deptor alone	50	1390.03	0.022541	3.69931	0.022988	2.52267	0.001094				74	85
Deptor	75	85	EHKEASDRETA			10	1272.58	Deptor FRB	0	1273.26	0.002958	0	0	2.51364	0.007043				75	85
Deptor	75	85	EHKEASDRETA			10	1272.58	Deptor FRB	0.05	1274.72	0.04047	1.46206	0.040578	2.74409	0.326064				75	85
Deptor	75	85	EHKEASDRETA			10	1272.58	Deptor FRB	0.5	1275.54	0.015046	2.28418	0.015334	2.52149	0.001579				75	85
Deptor	75	85	EHKEASDRETA			10	1272.58	Deptor FRB	5	1276.04	0.018552	2.7848	0.018786	2.50579	0.004761				75	85
Deptor	75	85	EHKEASDRETA			10	1272.58	Deptor FRB	50	1276.64	0.039719	3.38221	0.039829	2.50817	0.002869				75	85
Deptor	75	85	EHKEASDRETA			10	1272.58	Deptor alone	0	1273.26	0.002958	0	0	2.51364	0.007043				75	85
Deptor	75	85	EHKEASDRETA			10	1272.58	Deptor alone	0.05	1274.68	0.024365	1.42311	0.024544	2.51489	0.004983				75	85
Deptor	75	85	EHKEASDRETA			10	1272.58	Deptor alone	0.5	1275.54	0.009404	2.28233	0.009858	2.51801	0.004873				75	85
Deptor	75	85	EHKEASDRETA			10	1272.58	Deptor alone	5	1276.08	0.032778	2.81643	0.032912	2.51416	0.004342				75	85
Deptor	75	85	EHKEASDRETA			10	1272.58	Deptor alone	50	1276.59	0.029942	3.33357	0.030088	2.51812	0.00101				75	85
Deptor	82	88	RETAIKL			6	830.509	Deptor FRB	0	830.928	0.008643	0	0	5.73442	0.008846				82	88
Deptor	82	88	RETAIKL			6	830.509	Deptor FRB	0.05	831.021	0.018634	0.092637	0.020541	5.73428	0.005259				82	88
Deptor	82	88	RETAIKL			6	830.509	Deptor FRB	0.5	831.259	0.016226	0.330541	0.018385	5.71865	0.004248				82	88
Deptor	82	88	RETAIKL			6	830.509	Deptor FRB	5	831.53	0.007756	0.601279	0.011613	5.71237	0.004954				82	88
Deptor	82	88	RETAIKL			6	830.509	Deptor FRB	50	832.771	0.020659	1.84271	0.022395	5.69959	0.005706				82	88
Deptor	82	88	RETAIKL			6	830.509	Deptor alone	0	830.928	0.008643	0	0	5.73442	0.008846				82	88
Deptor	82	88	RETAIKL			6	830.509	Deptor alone	0.05	831.009	0.012705	0.080617	0.015366	5.75293	0.004638				82	88
Deptor	82	88	RETAIKL			6	830.509	Deptor alone	0.5	831.287	0.007541	0.358175	0.011471	5.72996	0.006927				82	88
Deptor	82	88	RETAIKL			6	830.509	Deptor alone	5	831.556	0.025921	0.627223	0.027324	5.72626	0.006152				82	88
Deptor	82	88	RETAIKL			6	830.509	Deptor alone	50	832.759	0.033324	1.83001	0.034427	5.71496	0.00756				82	88
Deptor	89	104	MQKLADRGIIHHVCDE			15	1864.92	Deptor FRB	0	1866.07	0.030729	0	0	5.96666	0.008916				89	104
Deptor	89	104	MQKLADRGIIHHVCDE			15	1864.92	Deptor FRB	0.05	1866.87	0.019113	0.793338	0.036188	5.96239	0.002561				89	104
Deptor	89	104	MQKLADRGIIHHVCDE			15	1864.92	Deptor FRB	0.5	1867.12	0.038604	1.04085	0.049341	5.94488	0.002064				89	104
Deptor	89	104	MQKLADRGIIHHVCDE			15	1864.92	Deptor FRB	5	1868.11	0.055296	2.03397	0.063261	5.9371	0.003539				89	104
Deptor	89	104	MQKLADRGIIHHVCDE			15	1864.92	Deptor FRB	50	1869.96	0.017377	3.88085	0.035302	5.91773	0.003312				89	104
Deptor	89	104	MQKLADRGIIHHVCDE			15	1864.92	Deptor alone	0	1866.07	0.030729	0	0	5.96666	0.008916				89	104
Deptor	89	104	MQKLADRGIIHHVCDE			15	1864.92	Deptor alone	0.05	1866.85	0.021632	0.771693	0.037579	5.98398	0.001955				89	104
Deptor	89	104	MQKLADRGIIHHVCDE			15	1864.92	Deptor alone	0.5	1867.17	0.028732	1.09659	0.042069	5.95718	0.006737				89	104
Deptor	89	104	MQKLADRGIIHHVCDE			15	1864.92	Deptor alone	5	1868.08	0.012687	2.00545	0.033245	5.95113	0.005242				89	104
Deptor	89	104	MQKLADRGIIHHVCDE			15	1864.92	Deptor alone	50	1869.96	0.017503	3.88817	0.035364	5.93266	0.006081				89	104
Deptor	105	113	HKEFKDVKL			8	1143.65	Deptor FRB	0	1144.25	0.013924	0	0	5.1254	0.011242				105	113
Deptor	105	113	HKEFKDVKL			8	1143.65	Deptor FRB	0.05	1147.05	0.002877	2.8014	0.014218	5.10975	0.002558				105	113
Deptor	105	113	HKEFKDVKL			8	1143.65	Deptor FRB	0.5	1147.24	0.008887	2.98852	0.016519	5.08333	0.002162				105	113
Deptor	105	113	HKEFKDVKL			8	1143.65	Deptor FRB	5	1147.17	0.014172	2.92421	0.019868	5.07071	0.00462				105	113
Deptor	105	113	HKEFKDVKL			8	1143.65	Deptor FRB	50	1147.2	0.009274	2.95165	0.01673	5.05824	0.004014				105	113
Deptor	105	113	HKEFKDVKL			8	1143.65	Deptor alone	0	1144.25	0.013924	0	0	5.1254	0.011242				105	113
Deptor	105	113	HKEFKDVKL			8	1143.65	Deptor alone	0.05	1147.03	0.021138	2.78327	0.025312	5.13427	0.001951				105	113
Deptor	105	113	HKEFKDVKL			8	1143.65	Deptor alone	0.5	1147.28	0.01659	3.0308	0.021659	5.0998	0.007044				105	113
Deptor	105	113	HKEFKDVKL			8	1143.65	Deptor alone	5	1147.21	0.029369	2.96357	0.032503	5.0883	0.006635				105	113
Deptor	105	113	HKEFKDVKL			8	1143.65	Deptor alone	50	1147.23	0.016381	2.98306	0.0215	5.07536	0.007122				105	113
Deptor	114	124	FYRFRKDDGTF			10	1451.71	Deptor FRB	0	1452.49	0.012148	0	0	6.7739	0.008735				114	124
Deptor	114	124	FYRFRKDDGTF			10	1451.71	Deptor FRB	0.05	1454.06	0.018782	1.57402	0.022368	6.76866	0.003714				114	124
Deptor	114	124	FYRFRKDDGTF			10	1451.71	Deptor FRB	0.5	1454.31	0.049521	1.82035	0.050989	6.74982	0.002885				114	124
Deptor	114	124	FYRFRKDDGTF			10	1451.71	Deptor FRB	5	1454.95	0.078849	2.4571	0.079779	6.74495	0.003439				114	124
Deptor	114	124	FYRFRKDDGTF			10	1451.71	Deptor FRB	50	1455.21	0.055769	2.71935	0.057076	6.73483	0.003115				114	124
Deptor	114	124	FYRFRKDDGTF			10	1451.71	Deptor alone	0	1452.49	0.012148	0	0	6.7739	0.008735				114	124
Deptor	114	124	FYRFRKDDGTF			10	1451.71	Deptor alone	0.05	1454.11	0.042647	1.62267	0.044343	6.79098	0.002962				114	124
Deptor	114	124	FYRFRKDDGTF			10	1451.71	Deptor alone	0.5	1454.34	0.047478	1.84727	0.049008	6.76382	0.006613				114	124
Deptor	114	124	FYRFRKDDGTF			10	1451.71	Deptor alone	5	1454.98	0.070501	2.49231	0.07154	6.76153	0.005339				114	124
Deptor	114	124	FYRFRKDDGTF			10	1451.71	Deptor alone	50	1455.24	0.035464	2.74525	0.037487	6.75177	0.007249				114	124
Deptor	118	132	RKDDGTFPLDNEVKA			13	1704.86	Deptor FRB	0	1705.85	0.004983	0	0	6.52356	0.00653				118	132
Deptor	118	132	RKDDGTFPLDNEVKA			13	1704.86	Deptor FRB	0.05	1709.85	0.087076	3.99603	0.087218	6.51644	0.005253				118	132
Deptor	118	132	RKDDGTFPLDNEVKA			13	1704.86	Deptor FRB	0.5	1710.07	0.067136	4.22248	0.06732	6.50197	0.001513				118	132
Deptor	118	132	RKDDGTFPLDNEVKA			13	1704.86	Deptor FRB	5	1710.02	0.040423	4.17129	0.040729	6.50269	0.003573				118	132
Deptor	118	132	RKDDGTFPLDNEVKA			13	1704.86	Deptor FRB	50	1710.02	0.010665	4.16896	0.011771	6.49467	0.002807				118	132
Deptor	118	132	RKDDGTFPLDNEVKA			13	1704.86	Deptor alone	0	1705.85	0.004983	0	0	6.52356	0.00653				118	132
Deptor	118	132	RKDDGTFPLDNEVKA			13	1704.86	Deptor alone	0.05	1709.77	0.044889	3.91736	0.045165	6.53487	0.003231				118	132
Deptor	118	132	RKDDGTFPLDNEVKA			13	1704.86	Deptor alone	0.5	1710.08	0.012771	4.23269	0.013709	6.51324	0.005542				118	132
Deptor	118	132	RKDDGTFPLDNEVKA			13	1704.86	Deptor alone	5	1710.11	0.030353	4.2569	0.030759	6.51387	0.004217				118	132
Deptor	118	132	RKDDGTFPLDNEVKA			13	1704.86	Deptor alone	50	1710.09	0.060159	4.24159	0.060365	6.50669	0.007661				118	132
Deptor	125	132	PLDNEVKA			6	885.468	Deptor FRB	0	885.905	0.011764	0	0	5.01456	0.006638				125	132
Deptor	125	132	PLDNEVKA			6	885.468	Deptor FRB	0.05	888.485	0.002073	2.58044	0.011946	5.02346	0.003472				125	132
Deptor	125	132	PLDNEVKA			6	885.468	Deptor FRB	0.5	888.798	0.004102	2.89302	0.012459	5.01368	0.001076				125	132
Deptor	125	132	PLDNEVKA			6	885.468	Deptor FRB	5	888.797	0.008544	2.89215	0.01454	5.00915	0.002923				125	132
Deptor	125	132	PLDNEVKA			6	885.468	Deptor FRB	50	888.805	0.003745	2.9001	0.012346	5.00266	0.004034				125	132
Deptor	125	132	PLDNEVKA			6	885.468	Deptor alone	0	885.905	0.011764	0	0	5.01456	0.006638				125	132
Deptor	125	132	PLDNEVKA			6	885.468	Deptor alone	0.05	888.419	0.020283	2.51391	0.023448	5.03559	0.003625				125	132
Deptor	125	132	PLDNEVKA			6	885.468	Deptor alone	0.5	888.78	0.022449	2.87468	0.025345	5.02083	0.005473				125	132
Deptor	125	132	PLDNEVKA			6	885.468	Deptor alone	5	888.776	0.018943	2.87139	0.022298	5.0199	0.00435				125	132
Deptor	125	132	PLDNEVKA			6	885.468	Deptor alone	50	888.778	0.019892	2.87271	0.023111	5.01515	0.006494				125	132
Deptor	130	139	VKAFMRGQRL			9	1205.69	Deptor FRB	0	1206.44	0.004715	0	0	5.46033	0.009023				130	139
Deptor	130	139	VKAFMRGQRL			9	1205.69	Deptor FRB	0.05	1206.97	0.026486	0.522359	0.026902	5.44107	0.002246				130	139
Deptor	130	139	VKAFMRGQRL			9	1205.69	Deptor FRB	0.5	1208.58	0.023982	2.13925	0.024441	5.4186	0.0022				130	139
Deptor	130	139	VKAFMRGQRL			9	1205.69	Deptor FRB	5	1209.74	0.023556	3.29568	0.024023	5.40949	0.003811				130	139
Deptor	130	139	VKAFMRGQRL			9	1205.69	Deptor FRB	50	1210.29	0.007185	3.84707	0.008594	5.39711	0.004413				130	139
Deptor	130	139	VKAFMRGQRL			9	1205.69	Deptor alone	0	1206.44	0.004715	0	0	5.46033	0.009023				130	139
Deptor	130	139	VKAFMRGQRL			9	1205.69	Deptor alone	0.05	1206.91	0.008945	0.466098	0.010112	5.47129	0.000805				130	139
Deptor	130	139	VKAFMRGQRL			9	1205.69	Deptor alone	0.5	1208.54	0.023389	2.10041	0.02386	5.44125	0.006131				130	139
Deptor	130	139	VKAFMRGQRL			9	1205.69	Deptor alone	5	1209.77	0.019051	3.32544	0.019625	5.43327	0.004196				130	139
Deptor	130	139	VKAFMRGQRL			9	1205.69	Deptor alone	50	1210.32	0.023313	3.87794	0.023785	5.42187	0.007095				130	139
Deptor	140	155	YEKLMSPENTLLQPRE			13	1947.98	Deptor FRB	0	1949.13	0.02677	0	0	7.79215	0.005964				140	155
Deptor	140	155	YEKLMSPENTLLQPRE			13	1947.98	Deptor FRB	0.05	1951.84	0.023361	2.71273	0.03553	7.76974	0.004859				140	155
Deptor	140	155	YEKLMSPENTLLQPRE			13	1947.98	Deptor FRB	0.5	1953.24	0.026537	4.11427	0.037694	7.75473	0.002749				140	155
Deptor	140	155	YEKLMSPENTLLQPRE			13	1947.98	Deptor FRB	5	1955.04	0.020725	5.91182	0.033855	7.75292	0.00447				140	155
Deptor	140	155	YEKLMSPENTLLQPRE			13	1947.98	Deptor FRB	50	1955.62	0.011463	6.4943	0.029121	7.71735	0.043409				140	155
Deptor	140	155	YEKLMSPENTLLQPRE			13	1947.98	Deptor alone	0	1949.13	0.02677	0	0	7.79215	0.005964				140	155
Deptor	140	155	YEKLMSPENTLLQPRE			13	1947.98	Deptor alone	0.05	1951.78	0.018679	2.64914	0.032643	7.80602	0.004591				140	155
Deptor	140	155	YEKLMSPENTLLQPRE			13	1947.98	Deptor alone	0.5	1953.33	0.022065	4.20446	0.034692	7.7816	0.005853				140	155
Deptor	140	155	YEKLMSPENTLLQPRE			13	1947.98	Deptor alone	5	1955.11	0.030757	5.97582	0.040776	7.78075	0.00403				140	155
Deptor	140	155	YEKLMSPENTLLQPRE			13	1947.98	Deptor alone	50	1955.69	0.033439	6.55706	0.042835	7.77381	0.006705				140	155
Deptor	140	157	YEKLMSPENTLLQPREEE			15	2206.07	Deptor FRB	0	2207.38	0.005954	0	0	7.83998	0.005817				140	157
Deptor	140	157	YEKLMSPENTLLQPREEE			15	2206.07	Deptor FRB	0.05	2210.32	0.014754	2.93677	0.01591	7.83397	0.004997				140	157
Deptor	140	157	YEKLMSPENTLLQPREEE			15	2206.07	Deptor FRB	0.5	2211.78	0.029693	4.40372	0.030284	7.81961	0.000772				140	157
Deptor	140	157	YEKLMSPENTLLQPREEE			15	2206.07	Deptor FRB	5	2213.67	0.02115	6.29334	0.021972	7.81816	0.00327				140	157
Deptor	140	157	YEKLMSPENTLLQPREEE			15	2206.07	Deptor FRB	50	2214.22	0.013896	6.84129	0.015118	7.77343	0.055958				140	157
Deptor	140	157	YEKLMSPENTLLQPREEE			15	2206.07	Deptor alone	0	2207.38	0.005954	0	0	7.83998	0.005817				140	157
Deptor	140	157	YEKLMSPENTLLQPREEE			15	2206.07	Deptor alone	0.05	2210.25	0.004075	2.86761	0.007215	7.85309	0.004271				140	157
Deptor	140	157	YEKLMSPENTLLQPREEE			15	2206.07	Deptor alone	0.5	2211.85	0.022045	4.47248	0.022835	7.83116	0.005959				140	157
Deptor	140	157	YEKLMSPENTLLQPREEE			15	2206.07	Deptor alone	5	2213.68	0.032763	6.30092	0.0333	7.83145	0.003193				140	157
Deptor	140	157	YEKLMSPENTLLQPREEE			15	2206.07	Deptor alone	50	2214.29	0.04428	6.91217	0.044678	7.82439	0.00678				140	157
Deptor	140	158	YEKLMSPENTLLQPREEEG			16	2263.09	Deptor FRB	0	2264.43	0.031026	0	0	7.79719	0.005676				140	158
Deptor	140	158	YEKLMSPENTLLQPREEEG			16	2263.09	Deptor FRB	0.05	2267.74	0.031741	3.30665	0.044386	7.77967	0.005123				140	158
Deptor	140	158	YEKLMSPENTLLQPREEEG			16	2263.09	Deptor FRB	0.5	2269.13	0.026272	4.69482	0.040655	7.76617	0.00158				140	158
Deptor	140	158	YEKLMSPENTLLQPREEEG			16	2263.09	Deptor FRB	5	2271.05	0.060198	6.61918	0.067723	7.76427	0.00386				140	158
Deptor	140	158	YEKLMSPENTLLQPREEEG			16	2263.09	Deptor FRB	50	2271.58	0.048041	7.15073	0.057189	7.72569	0.04858				140	158
Deptor	140	158	YEKLMSPENTLLQPREEEG			16	2263.09	Deptor alone	0	2264.43	0.031026	0	0	7.79719	0.005676				140	158
Deptor	140	158	YEKLMSPENTLLQPREEEG			16	2263.09	Deptor alone	0.05	2267.69	0.032987	3.26161	0.045285	7.81078	0.004695				140	158
Deptor	140	158	YEKLMSPENTLLQPREEEG			16	2263.09	Deptor alone	0.5	2269.22	0.0306	4.7848	0.043577	7.78747	0.005925				140	158
Deptor	140	158	YEKLMSPENTLLQPREEEG			16	2263.09	Deptor alone	5	2271.1	0.050802	6.67245	0.059527	7.78713	0.003795				140	158
Deptor	140	158	YEKLMSPENTLLQPREEEG			16	2263.09	Deptor alone	50	2271.71	0.069724	7.27834	0.076315	7.78005	0.00689				140	158
Deptor	144	161	MSPENTLLQPREEEGVKY			15	2120.03	Deptor FRB	0	2121.32	0.034431	0	0	7.70518	0.005634				144	161
Deptor	144	161	MSPENTLLQPREEEGVKY			15	2120.03	Deptor FRB	0.05	2125.56	0.011144	4.24614	0.036189	7.69872	0.004776				144	161
Deptor	144	161	MSPENTLLQPREEEGVKY			15	2120.03	Deptor FRB	0.5	2127.89	0.02435	6.57495	0.042171	7.68352	0.001157				144	161
Deptor	144	161	MSPENTLLQPREEEGVKY			15	2120.03	Deptor FRB	5	2130.01	0.027968	8.69599	0.044359	7.68121	0.003375				144	161
Deptor	144	161	MSPENTLLQPREEEGVKY			15	2120.03	Deptor FRB	50	2130.17	0.035327	8.85072	0.04933	7.65975	0.025415				144	161
Deptor	144	161	MSPENTLLQPREEEGVKY			15	2120.03	Deptor alone	0	2121.32	0.034431	0	0	7.70518	0.005634				144	161
Deptor	144	161	MSPENTLLQPREEEGVKY			15	2120.03	Deptor alone	0.05	2125.41	0.022092	4.09857	0.040908	7.72256	0.004752				144	161
Deptor	144	161	MSPENTLLQPREEEGVKY			15	2120.03	Deptor alone	0.5	2128	0.015618	6.68398	0.037807	7.69964	0.005887				144	161
Deptor	144	161	MSPENTLLQPREEEGVKY			15	2120.03	Deptor alone	5	2130.07	0.042963	8.7536	0.055057	7.7001	0.003092				144	161
Deptor	144	161	MSPENTLLQPREEEGVKY			15	2120.03	Deptor alone	50	2130.22	0.020583	8.90872	0.040114	7.69429	0.006996				144	161
Deptor	144	166	MSPENTLLQPREEEGVKYERTFM			20	2784.33	Deptor FRB	0	2786.11	0.009988	0	0	8.28285	0.007592				144	166
Deptor	144	166	MSPENTLLQPREEEGVKYERTFM			20	2784.33	Deptor FRB	0.05	2790.39	0.016649	4.27851	0.019415	8.28415	0.007272				144	166
Deptor	144	166	MSPENTLLQPREEEGVKYERTFM			20	2784.33	Deptor FRB	0.5	2792.69	0.037483	6.57192	0.038791	8.26694	0.003528				144	166
Deptor	144	166	MSPENTLLQPREEEGVKYERTFM			20	2784.33	Deptor FRB	5	2794.9	0.046195	8.78682	0.047263	8.26247	0.003628				144	166
Deptor	144	166	MSPENTLLQPREEEGVKYERTFM			20	2784.33	Deptor FRB	50	2796	0.086779	9.88541	0.087352	8.24526	0.01338				144	166
Deptor	144	166	MSPENTLLQPREEEGVKYERTFM			20	2784.33	Deptor alone	0	2786.11	0.009988	0	0	8.28285	0.007592				144	166
Deptor	144	166	MSPENTLLQPREEEGVKYERTFM			20	2784.33	Deptor alone	0.05	2790.3	0.033973	4.18884	0.035411	8.28503	0.012279				144	166
Deptor	144	166	MSPENTLLQPREEEGVKYERTFM			20	2784.33	Deptor alone	0.5	2792.8	0.050562	6.68331	0.051539	8.2656	0.006121				144	166
Deptor	144	166	MSPENTLLQPREEEGVKYERTFM			20	2784.33	Deptor alone	5	2794.98	0.08864	8.86476	0.089201	8.26211	0.002823				144	166
Deptor	144	166	MSPENTLLQPREEEGVKYERTFM			20	2784.33	Deptor alone	50	2796.06	0.107208	9.94245	0.107672	8.25499	0.00731				144	166
Deptor	148	161	NTLLQPREEEGVKY			12	1675.87	Deptor FRB	0	1676.87	0.008287	0	0	7.95564	0.007561				148	161
Deptor	148	161	NTLLQPREEEGVKY			12	1675.87	Deptor FRB	0.05	1679.82	0.038922	2.94281	0.039794	7.94427	0.003596				148	161
Deptor	148	161	NTLLQPREEEGVKY			12	1675.87	Deptor FRB	0.5	1681.82	0.074674	4.9455	0.075132	7.92673	0.00104				148	161
Deptor	148	161	NTLLQPREEEGVKY			12	1675.87	Deptor FRB	5	1683.54	0.068252	6.66841	0.068753	7.9261	0.003292				148	161
Deptor	148	161	NTLLQPREEEGVKY			12	1675.87	Deptor FRB	50	1683.74	0.062991	6.87148	0.063534	7.8984	0.027701				148	161
Deptor	148	161	NTLLQPREEEGVKY			12	1675.87	Deptor alone	0	1676.87	0.008287	0	0	7.95564	0.007561				148	161
Deptor	148	161	NTLLQPREEEGVKY			12	1675.87	Deptor alone	0.05	1679.8	0.057776	2.9299	0.058367	7.95842	0.019868				148	161
Deptor	148	161	NTLLQPREEEGVKY			12	1675.87	Deptor alone	0.5	1681.88	0.053488	5.00533	0.054127	7.94355	0.005662				148	161
Deptor	148	161	NTLLQPREEEGVKY			12	1675.87	Deptor alone	5	1683.6	0.020918	6.72775	0.0225	7.94457	0.003307				148	161
Deptor	148	161	NTLLQPREEEGVKY			12	1675.87	Deptor alone	50	1683.79	0.051331	6.91423	0.051995	7.93711	0.007023				148	161
Deptor	149	161	TLLQPREEEGVKY			11	1561.82	Deptor FRB	0	1562.66	0.005881	0	0	6.62711	0.007672				149	161
Deptor	149	161	TLLQPREEEGVKY			11	1561.82	Deptor FRB	0.05	1564.48	0.016793	1.81844	0.017793	6.6313	0.004578				149	161
Deptor	149	161	TLLQPREEEGVKY			11	1561.82	Deptor FRB	0.5	1566.2	0.027936	3.53803	0.028549	6.61658	0.002468				149	161
Deptor	149	161	TLLQPREEEGVKY			11	1561.82	Deptor FRB	5	1567.92	0.023823	5.26485	0.024539	6.61301	0.003545				149	161
Deptor	149	161	TLLQPREEEGVKY			11	1561.82	Deptor FRB	50	1568.04	0.019664	5.38065	0.020525	6.60569	0.003919				149	161
Deptor	149	161	TLLQPREEEGVKY			11	1561.82	Deptor alone	0	1562.66	0.005881	0	0	6.62711	0.007672				149	161
Deptor	149	161	TLLQPREEEGVKY			11	1561.82	Deptor alone	0.05	1564.42	0.009541	1.76585	0.011209	6.64789	0.003891				149	161
Deptor	149	161	TLLQPREEEGVKY			11	1561.82	Deptor alone	0.5	1566.28	0.036052	3.6223	0.036528	6.62454	0.006044				149	161
Deptor	149	161	TLLQPREEEGVKY			11	1561.82	Deptor alone	5	1567.97	0.02611	5.31254	0.026764	6.62314	0.004066				149	161
Deptor	149	161	TLLQPREEEGVKY			11	1561.82	Deptor alone	50	1568.13	0.030255	5.46923	0.030821	6.61652	0.007146				149	161
Deptor	151	165	LQPREEEGVKYERTF			13	1880.95	Deptor FRB	0	1882.03	0.008214	0	0	6.93413	0.007033				151	165
Deptor	151	165	LQPREEEGVKYERTF			13	1880.95	Deptor FRB	0.05	1884.37	0.063596	2.33121	0.064124	6.94152	0.005708				151	165
Deptor	151	165	LQPREEEGVKYERTF			13	1880.95	Deptor FRB	0.5	1885.86	0.017939	3.82614	0.01973	6.92382	0.001336				151	165
Deptor	151	165	LQPREEEGVKYERTF			13	1880.95	Deptor FRB	5	1887.19	0.15474	5.15315	0.154958	6.9177	0.004242				151	165
Deptor	151	165	LQPREEEGVKYERTF			13	1880.95	Deptor FRB	50	1887.83	0.071329	5.79534	0.0718	6.90779	0.002728				151	165
Deptor	151	165	LQPREEEGVKYERTF			13	1880.95	Deptor alone	0	1882.03	0.008214	0	0	6.93413	0.007033				151	165
Deptor	151	165	LQPREEEGVKYERTF			13	1880.95	Deptor alone	0.05	1884.29	0.005928	2.25267	0.01013	6.95199	0.003097				151	165
Deptor	151	165	LQPREEEGVKYERTF			13	1880.95	Deptor alone	0.5	1885.97	0.067643	3.93929	0.06814	6.92497	0.006252				151	165
Deptor	151	165	LQPREEEGVKYERTF			13	1880.95	Deptor alone	5	1887.43	0.043425	5.40038	0.044195	6.92264	0.004073				151	165
Deptor	151	165	LQPREEEGVKYERTF			13	1880.95	Deptor alone	50	1888.05	0.018887	6.01074	0.020596	6.91406	0.006903				151	165
Deptor	152	166	QPREEEGVKYERTFM			13	1898.91	Deptor FRB	0	1900.07	0.006139	0	0	6.51769	0.007703				152	166
Deptor	152	166	QPREEEGVKYERTFM			13	1898.91	Deptor FRB	0.05	1902.46	0.016635	2.39518	0.017731	6.51137	0.004454				152	166
Deptor	152	166	QPREEEGVKYERTFM			13	1898.91	Deptor FRB	0.5	1903.67	0.014602	3.60007	0.01584	6.49315	0.001389				152	166
Deptor	152	166	QPREEEGVKYERTFM			13	1898.91	Deptor FRB	5	1904.69	0.025502	4.62425	0.026231	6.48776	0.00281				152	166
Deptor	152	166	QPREEEGVKYERTFM			13	1898.91	Deptor FRB	50	1905.64	0.029407	5.57667	0.030041	6.47632	0.00313				152	166
Deptor	152	166	QPREEEGVKYERTFM			13	1898.91	Deptor alone	0	1900.07	0.006139	0	0	6.51769	0.007703				152	166
Deptor	152	166	QPREEEGVKYERTFM			13	1898.91	Deptor alone	0.05	1902.38	0.021124	2.31181	0.021998	6.52977	0.003513				152	166
Deptor	152	166	QPREEEGVKYERTFM			13	1898.91	Deptor alone	0.5	1903.71	0.021649	3.64428	0.022502	6.50308	0.005883				152	166
Deptor	152	166	QPREEEGVKYERTFM			13	1898.91	Deptor alone	5	1904.73	0.033068	4.66358	0.033633	6.49973	0.00395				152	166
Deptor	152	166	QPREEEGVKYERTFM			13	1898.91	Deptor alone	50	1905.67	0.037584	5.60503	0.038082	6.48888	0.007105				152	166
Deptor	171	188	LDWLVQEGEATTRKEAEQ			17	2103.04	Deptor FRB	0	2104.2	0.025205	0	0	8.32584	0.006654				171	188
Deptor	171	188	LDWLVQEGEATTRKEAEQ			17	2103.04	Deptor FRB	0.05	2106.49	0.017778	2.29064	0.030844	8.3288	0.00619				171	188
Deptor	171	188	LDWLVQEGEATTRKEAEQ			17	2103.04	Deptor FRB	0.5	2108	0.020515	3.79973	0.032499	8.31047	0.001325				171	188
Deptor	171	188	LDWLVQEGEATTRKEAEQ			17	2103.04	Deptor FRB	5	2109.35	0.037299	5.15674	0.045016	8.30632	0.002315				171	188
Deptor	171	188	LDWLVQEGEATTRKEAEQ			17	2103.04	Deptor FRB	50	2110.48	0.004351	6.28224	0.025578	8.28828	0.011732				171	188
Deptor	171	188	LDWLVQEGEATTRKEAEQ			17	2103.04	Deptor alone	0	2104.2	0.025205	0	0	8.32584	0.006654				171	188
Deptor	171	188	LDWLVQEGEATTRKEAEQ			17	2103.04	Deptor alone	0.05	2106.43	0.014913	2.23216	0.029286	8.33278	0.01124				171	188
Deptor	171	188	LDWLVQEGEATTRKEAEQ			17	2103.04	Deptor alone	0.5	2108.03	0.037755	3.83159	0.045395	8.31205	0.005647				171	188
Deptor	171	188	LDWLVQEGEATTRKEAEQ			17	2103.04	Deptor alone	5	2109.33	0.030236	5.13739	0.039364	8.30954	0.002742				171	188
Deptor	171	188	LDWLVQEGEATTRKEAEQ			17	2103.04	Deptor alone	50	2110.47	0.031899	6.27384	0.040655	8.29982	0.00698				171	188
Deptor	171	190	LDWLVQEGEATTRKEAEQLC			19	2319.13	Deptor FRB	0	2320.57	0.010592	0	0	9.78219	0.002328				171	190
Deptor	171	190	LDWLVQEGEATTRKEAEQLC			19	2319.13	Deptor FRB	0.05	2323.11	0.011854	2.53745	0.015897	9.78834	0.007644				171	190
Deptor	171	190	LDWLVQEGEATTRKEAEQLC			19	2319.13	Deptor FRB	0.5	2324.87	0.031901	4.29857	0.033613	9.76365	0.001033				171	190
Deptor	171	190	LDWLVQEGEATTRKEAEQLC			19	2319.13	Deptor FRB	5	2326.48	0.044494	5.90402	0.045737	9.75385	0.008508				171	190
Deptor	171	190	LDWLVQEGEATTRKEAEQLC			19	2319.13	Deptor FRB	50	2328.24	0.055909	7.66806	0.056903	9.74069	0.005373				171	190
Deptor	171	190	LDWLVQEGEATTRKEAEQLC			19	2319.13	Deptor alone	0	2320.57	0.010592	0	0	9.78219	0.002328				171	190
Deptor	171	190	LDWLVQEGEATTRKEAEQLC			19	2319.13	Deptor alone	0.05	2323.09	0.022278	2.51272	0.024668	9.79687	0.004544				171	190
Deptor	171	190	LDWLVQEGEATTRKEAEQLC			19	2319.13	Deptor alone	0.5	2324.94	0.026982	4.3672	0.028987	9.76458	0.006105				171	190
Deptor	171	190	LDWLVQEGEATTRKEAEQLC			19	2319.13	Deptor alone	5	2326.55	0.03691	5.98084	0.0384	9.76113	0.004168				171	190
Deptor	171	190	LDWLVQEGEATTRKEAEQLC			19	2319.13	Deptor alone	50	2328.27	0.065093	7.69583	0.06595	9.74585	0.007766				171	190
Deptor	171	193	LDWLVQEGEATTRKEAEQLCHRL			22	2725.37	Deptor FRB	0	2727.05	0.024028	0	0	10.0945	0.005186				171	193
Deptor	171	193	LDWLVQEGEATTRKEAEQLCHRL			22	2725.37	Deptor FRB	0.05	2729.64	0.037069	2.58697	0.044175	10.0958	0.00908				171	193
Deptor	171	193	LDWLVQEGEATTRKEAEQLCHRL			22	2725.37	Deptor FRB	0.5	2731.65	0.038148	4.60027	0.045085	10.0662	0.00156				171	193
Deptor	171	193	LDWLVQEGEATTRKEAEQLCHRL			22	2725.37	Deptor FRB	5	2733.57	0.046257	6.51691	0.052125	10.0549	0.005091				171	193
Deptor	171	193	LDWLVQEGEATTRKEAEQLCHRL			22	2725.37	Deptor FRB	50	2735.42	0.0402	8.36155	0.046834	10.0333	0.005525				171	193
Deptor	171	193	LDWLVQEGEATTRKEAEQLCHRL			22	2725.37	Deptor alone	0	2727.05	0.024028	0	0	10.0945	0.005186				171	193
Deptor	171	193	LDWLVQEGEATTRKEAEQLCHRL			22	2725.37	Deptor alone	0.05	2729.58	0.02637	2.52918	0.035675	10.106	0.003431				171	193
Deptor	171	193	LDWLVQEGEATTRKEAEQLCHRL			22	2725.37	Deptor alone	0.5	2731.68	0.040969	4.62666	0.047495	10.0684	0.007135				171	193
Deptor	171	193	LDWLVQEGEATTRKEAEQLCHRL			22	2725.37	Deptor alone	5	2733.58	0.064028	6.52694	0.068388	10.0624	0.005995				171	193
Deptor	171	193	LDWLVQEGEATTRKEAEQLCHRL			22	2725.37	Deptor alone	50	2735.45	0.062067	8.39699	0.066556	10.0395	0.006515				171	193
Deptor	171	195	LDWLVQEGEATTRKEAEQLCHRLME			24	2985.46	Deptor FRB	0	2987.53	0.052501	0	0	10.7639	0.007242				171	195
Deptor	171	195	LDWLVQEGEATTRKEAEQLCHRLME			24	2985.46	Deptor FRB	0.05	2990.18	0.086583	2.64236	0.101257	10.7689	0.009332				171	195
Deptor	171	195	LDWLVQEGEATTRKEAEQLCHRLME			24	2985.46	Deptor FRB	0.5	2992.15	0.075809	4.61357	0.092214	10.7402	0.002192				171	195
Deptor	171	195	LDWLVQEGEATTRKEAEQLCHRLME			24	2985.46	Deptor FRB	5	2994	0.055727	6.4625	0.076563	10.7299	0.004944				171	195
Deptor	171	195	LDWLVQEGEATTRKEAEQLCHRLME			24	2985.46	Deptor FRB	50	2996.21	0.032418	8.6778	0.061704	10.7071	0.005205				171	195
Deptor	171	195	LDWLVQEGEATTRKEAEQLCHRLME			24	2985.46	Deptor alone	0	2987.53	0.052501	0	0	10.7639	0.007242				171	195
Deptor	171	195	LDWLVQEGEATTRKEAEQLCHRLME			24	2985.46	Deptor alone	0.05	2990.13	0.09729	2.59751	0.110552	10.7795	0.004561				171	195
Deptor	171	195	LDWLVQEGEATTRKEAEQLCHRLME			24	2985.46	Deptor alone	0.5	2992.19	0.082174	4.65219	0.097514	10.7439	0.007314				171	195
Deptor	171	195	LDWLVQEGEATTRKEAEQLCHRLME			24	2985.46	Deptor alone	5	2994.03	0.05803	6.49356	0.078255	10.7426	0.009642				171	195
Deptor	171	195	LDWLVQEGEATTRKEAEQLCHRLME			24	2985.46	Deptor alone	50	2996.26	0.057244	8.72937	0.077674	10.7132	0.005463				171	195
Deptor	174	188	LVQEGEATTRKEAEQ			14	1688.85	Deptor FRB	0	1689.79	0.017367	0	0	4.101	0.006604				174	188
Deptor	174	188	LVQEGEATTRKEAEQ			14	1688.85	Deptor FRB	0.05	1692.24	0.027035	2.45406	0.032133	4.11009	0.005115				174	188
Deptor	174	188	LVQEGEATTRKEAEQ			14	1688.85	Deptor FRB	0.5	1693.94	0.027537	4.1562	0.032556	4.10023	0.003699				174	188
Deptor	174	188	LVQEGEATTRKEAEQ			14	1688.85	Deptor FRB	5	1695.32	0.027706	5.53132	0.032699	4.09096	0.004236				174	188
Deptor	174	188	LVQEGEATTRKEAEQ			14	1688.85	Deptor FRB	50	1696.24	0.04135	6.45435	0.044849	4.08225	0.00536				174	188
Deptor	174	188	LVQEGEATTRKEAEQ			14	1688.85	Deptor alone	0	1689.79	0.017367	0	0	4.101	0.006604				174	188
Deptor	174	188	LVQEGEATTRKEAEQ			14	1688.85	Deptor alone	0.05	1692.22	0.023676	2.42795	0.029363	4.11741	0.005604				174	188
Deptor	174	188	LVQEGEATTRKEAEQ			14	1688.85	Deptor alone	0.5	1693.95	0.058124	4.15771	0.060663	4.10145	0.006864				174	188
Deptor	174	188	LVQEGEATTRKEAEQ			14	1688.85	Deptor alone	5	1695.32	0.042593	5.52727	0.045997	4.09549	0.005987				174	188
Deptor	174	188	LVQEGEATTRKEAEQ			14	1688.85	Deptor alone	50	1696.28	0.053569	6.48887	0.056314	4.08892	0.007461				174	188
Deptor	175	189	VQEGEATTRKEAEQL			14	1688.85	Deptor FRB	0	1689.7	0.003864	0	0	5.17912	0.006338				175	189
Deptor	175	189	VQEGEATTRKEAEQL			14	1688.85	Deptor FRB	0.05	1691.85	0.006488	2.15048	0.007551	5.1833	0.004537				175	189
Deptor	175	189	VQEGEATTRKEAEQL			14	1688.85	Deptor FRB	0.5	1693.14	0.017873	3.44591	0.018286	5.16794	0.001659				175	189
Deptor	175	189	VQEGEATTRKEAEQL			14	1688.85	Deptor FRB	5	1694.06	0.023602	4.36771	0.023916	5.16282	0.002962				175	189
Deptor	175	189	VQEGEATTRKEAEQL			14	1688.85	Deptor FRB	50	1695.15	0.024401	5.45085	0.024705	5.15131	0.002968				175	189
Deptor	175	189	VQEGEATTRKEAEQL			14	1688.85	Deptor alone	0	1689.7	0.003864	0	0	5.17912	0.006338				175	189
Deptor	175	189	VQEGEATTRKEAEQL			14	1688.85	Deptor alone	0.05	1691.83	0.010625	2.13731	0.011306	5.19294	0.004794				175	189
Deptor	175	189	VQEGEATTRKEAEQL			14	1688.85	Deptor alone	0.5	1693.21	0.025037	3.51078	0.025333	5.17014	0.005626				175	189
Deptor	175	189	VQEGEATTRKEAEQL			14	1688.85	Deptor alone	5	1694.12	0.030831	4.42812	0.031072	5.16701	0.003693				175	189
Deptor	175	189	VQEGEATTRKEAEQL			14	1688.85	Deptor alone	50	1695.2	0.029693	5.50719	0.029943	5.15822	0.006874				175	189
Deptor	175	190	VQEGEATTRKEAEQLC			15	1791.85	Deptor FRB	0	1792.93	0.010143	0	0	5.87343	0.006559				175	190
Deptor	175	190	VQEGEATTRKEAEQLC			15	1791.85	Deptor FRB	0.05	1795.14	0.070111	2.21142	0.070841	5.86772	0.004808				175	190
Deptor	175	190	VQEGEATTRKEAEQLC			15	1791.85	Deptor FRB	0.5	1796.37	0.027933	3.44097	0.029718	5.84916	0.002933				175	190
Deptor	175	190	VQEGEATTRKEAEQLC			15	1791.85	Deptor FRB	5	1797.33	0.067102	4.4045	0.067864	5.84391	0.003901				175	190
Deptor	175	190	VQEGEATTRKEAEQLC			15	1791.85	Deptor FRB	50	1798.42	0.02775	5.4905	0.029546	5.83041	0.004446				175	190
Deptor	175	190	VQEGEATTRKEAEQLC			15	1791.85	Deptor alone	0	1792.93	0.010143	0	0	5.87343	0.006559				175	190
Deptor	175	190	VQEGEATTRKEAEQLC			15	1791.85	Deptor alone	0.05	1795.12	0.091121	2.19279	0.091684	5.88392	0.005199				175	190
Deptor	175	190	VQEGEATTRKEAEQLC			15	1791.85	Deptor alone	0.5	1796.41	0.034384	3.47675	0.035849	5.85783	0.006345				175	190
Deptor	175	190	VQEGEATTRKEAEQLC			15	1791.85	Deptor alone	5	1797.38	0.066715	4.44624	0.067481	5.85437	0.00423				175	190
Deptor	175	190	VQEGEATTRKEAEQLC			15	1791.85	Deptor alone	50	1798.45	0.024186	5.51974	0.026227	5.84248	0.007126				175	190
Deptor	177	189	EGEATTRKEAEQL			12	1461.72	Deptor FRB	0	1462.52	0.011647	0	0	5.19026	0.005782				177	189
Deptor	177	189	EGEATTRKEAEQL			12	1461.72	Deptor FRB	0.05	1464.35	0.050801	1.83486	0.052119	5.19312	0.003601				177	189
Deptor	177	189	EGEATTRKEAEQL			12	1461.72	Deptor FRB	0.5	1465.59	0.022713	3.07058	0.025525	5.17664	0.001795				177	189
Deptor	177	189	EGEATTRKEAEQL			12	1461.72	Deptor FRB	5	1466.26	0.035297	3.7426	0.037169	5.17114	0.002555				177	189
Deptor	177	189	EGEATTRKEAEQL			12	1461.72	Deptor FRB	50	1467.15	0.063015	4.63586	0.064082	5.16193	0.000354				177	189
Deptor	177	189	EGEATTRKEAEQL			12	1461.72	Deptor alone	0	1462.52	0.011647	0	0	5.19026	0.005782				177	189
Deptor	177	189	EGEATTRKEAEQL			12	1461.72	Deptor alone	0.05	1464.46	0.043295	1.94043	0.044835	5.20374	0.005234				177	189
Deptor	177	189	EGEATTRKEAEQL			12	1461.72	Deptor alone	0.5	1465.57	0.017424	3.05391	0.020958	5.18276	0.005618				177	189
Deptor	177	189	EGEATTRKEAEQL			12	1461.72	Deptor alone	5	1466.22	0.016081	3.70204	0.019856	5.18148	0.003733				177	189
Deptor	177	189	EGEATTRKEAEQL			12	1461.72	Deptor alone	50	1467.21	0.135737	4.69449	0.136236	5.17017	0.008481				177	189
Deptor	177	195	EGEATTRKEAEQLCHRLME			18	2231.05	Deptor FRB	0	2232.44	0.152061	0	0	8.32316	0.009416				177	195
Deptor	177	195	EGEATTRKEAEQLCHRLME			18	2231.05	Deptor FRB	0.05	2234.26	0.048477	1.81806	0.159602	8.31613	0.006209				177	195
Deptor	177	195	EGEATTRKEAEQLCHRLME			18	2231.05	Deptor FRB	0.5	2235.34	0.17009	2.89774	0.228152	8.29196	0.001466				177	195
Deptor	177	195	EGEATTRKEAEQLCHRLME			18	2231.05	Deptor FRB	5	2236.31	0.067656	3.86289	0.166433	8.28327	0.001641				177	195
Deptor	177	195	EGEATTRKEAEQLCHRLME			18	2231.05	Deptor FRB	50	2237.69	0.091132	5.24523	0.177279	8.25769	0.008733				177	195
Deptor	177	195	EGEATTRKEAEQLCHRLME			18	2231.05	Deptor alone	0	2232.44	0.152061	0	0	8.32316	0.009416				177	195
Deptor	177	195	EGEATTRKEAEQLCHRLME			18	2231.05	Deptor alone	0.05	2234.26	0.026012	1.81849	0.15427	8.32548	0.00965				177	195
Deptor	177	195	EGEATTRKEAEQLCHRLME			18	2231.05	Deptor alone	0.5	2235.39	0.015971	2.95216	0.152898	8.29588	0.005689				177	195
Deptor	177	195	EGEATTRKEAEQLCHRLME			18	2231.05	Deptor alone	5	2236.26	0.115538	3.81645	0.190976	8.28845	0.003381				177	195
Deptor	177	195	EGEATTRKEAEQLCHRLME			18	2231.05	Deptor alone	50	2237.78	0.025826	5.33765	0.154239	8.26816	0.007137				177	195
Deptor	189	213	LCHRLMEHGIIQHVSSKHPFVDSNL			23	2897.47	Deptor FRB	0	2899.29	0.039513	0	0	6.99689	0.011563				189	213
Deptor	189	213	LCHRLMEHGIIQHVSSKHPFVDSNL			23	2897.47	Deptor FRB	0.05	2900.75	0.030954	1.45755	0.050194	6.96007	0.005254				189	213
Deptor	189	213	LCHRLMEHGIIQHVSSKHPFVDSNL			23	2897.47	Deptor FRB	0.5	2901.5	0.030829	2.20859	0.050117	6.92298	0.004394				189	213
Deptor	189	213	LCHRLMEHGIIQHVSSKHPFVDSNL			23	2897.47	Deptor FRB	5	2902.4	0.044624	3.11227	0.059604	6.90281	0.006392				189	213
Deptor	189	213	LCHRLMEHGIIQHVSSKHPFVDSNL			23	2897.47	Deptor FRB	50	2903.1	0.056994	3.80556	0.069351	7.06234	0.154136				189	213
Deptor	189	213	LCHRLMEHGIIQHVSSKHPFVDSNL			23	2897.47	Deptor alone	0	2899.29	0.039513	0	0	6.99689	0.011563				189	213
Deptor	189	213	LCHRLMEHGIIQHVSSKHPFVDSNL			23	2897.47	Deptor alone	0.05	2900.7	0.010013	1.41201	0.040762	6.99558	0.004902				189	213
Deptor	189	213	LCHRLMEHGIIQHVSSKHPFVDSNL			23	2897.47	Deptor alone	0.5	2901.59	0.056067	2.29338	0.068591	6.95051	0.010705				189	213
Deptor	189	213	LCHRLMEHGIIQHVSSKHPFVDSNL			23	2897.47	Deptor alone	5	2902.53	0.042239	3.23505	0.05784	7.2499	0.004452				189	213
Deptor	189	213	LCHRLMEHGIIQHVSSKHPFVDSNL			23	2897.47	Deptor alone	50	2903.04	0.038857	3.74476	0.055418	7.16972	0.111723				189	213
Deptor	191	213	HRLMEHGIIQHVSSKHPFVDSNL			21	2681.37	Deptor FRB	0	2683	0.043047	0	0	6.62118	0.013955				191	213
Deptor	191	213	HRLMEHGIIQHVSSKHPFVDSNL			21	2681.37	Deptor FRB	0.05	2684.46	0.017169	1.4603	0.046344	6.59061	0.006617				191	213
Deptor	191	213	HRLMEHGIIQHVSSKHPFVDSNL			21	2681.37	Deptor FRB	0.5	2685.18	0.063676	2.18011	0.076861	6.55749	0.005876				191	213
Deptor	191	213	HRLMEHGIIQHVSSKHPFVDSNL			21	2681.37	Deptor FRB	5	2686.09	0.02262	3.09067	0.048628	6.54276	0.006374				191	213
Deptor	191	213	HRLMEHGIIQHVSSKHPFVDSNL			21	2681.37	Deptor FRB	50	2686.62	0.052308	3.61646	0.067743	6.52503	0.004416				191	213
Deptor	191	213	HRLMEHGIIQHVSSKHPFVDSNL			21	2681.37	Deptor alone	0	2683	0.043047	0	0	6.62118	0.013955				191	213
Deptor	191	213	HRLMEHGIIQHVSSKHPFVDSNL			21	2681.37	Deptor alone	0.05	2684.48	0.032236	1.48104	0.053779	6.61855	0.007141				191	213
Deptor	191	213	HRLMEHGIIQHVSSKHPFVDSNL			21	2681.37	Deptor alone	0.5	2685.31	0.017958	2.30484	0.046642	6.57504	0.0117				191	213
Deptor	191	213	HRLMEHGIIQHVSSKHPFVDSNL			21	2681.37	Deptor alone	5	2686.13	0.028548	3.12566	0.051653	6.5586	0.009132				191	213
Deptor	191	213	HRLMEHGIIQHVSSKHPFVDSNL			21	2681.37	Deptor alone	50	2686.58	0.036223	3.57551	0.056259	6.54053	0.006713				191	213
Deptor	201	214	HVSSKHPFVDSNLL			12	1579.82	Deptor FRB	0	1580.67	0.009753	0	0	7.28504	0.009997				201	214
Deptor	201	214	HVSSKHPFVDSNLL			12	1579.82	Deptor FRB	0.05	1581.66	0.025537	0.986622	0.027336	7.27789	0.004317				201	214
Deptor	201	214	HVSSKHPFVDSNLL			12	1579.82	Deptor FRB	0.5	1582.3	0.024537	1.6262	0.026404	7.25363	0.001643				201	214
Deptor	201	214	HVSSKHPFVDSNLL			12	1579.82	Deptor FRB	5	1583.3	0.034493	2.62804	0.035845	7.24425	0.002901				201	214
Deptor	201	214	HVSSKHPFVDSNLL			12	1579.82	Deptor FRB	50	1583.64	0.054962	2.96851	0.055821	7.22982	0.003188				201	214
Deptor	201	214	HVSSKHPFVDSNLL			12	1579.82	Deptor alone	0	1580.67	0.009753	0	0	7.28504	0.009997				201	214
Deptor	201	214	HVSSKHPFVDSNLL			12	1579.82	Deptor alone	0.05	1581.79	0.028266	1.12078	0.029902	7.29293	0.001893				201	214
Deptor	201	214	HVSSKHPFVDSNLL			12	1579.82	Deptor alone	0.5	1582.42	0.108763	1.74967	0.1092	7.25951	0.007037				201	214
Deptor	201	214	HVSSKHPFVDSNLL			12	1579.82	Deptor alone	5	1583.24	0.063425	2.56285	0.064171	7.25276	0.004604				201	214
Deptor	201	214	HVSSKHPFVDSNLL			12	1579.82	Deptor alone	50	1583.67	0.023146	3.00237	0.025117	7.23902	0.005983				201	214
Deptor	222	230	RRRRRLMEL			8	1285.77	Deptor FRB	0	1286.5	0.010431	0	0	5.52778	0.021726				222	230
Deptor	222	230	RRRRRLMEL			8	1285.77	Deptor FRB	0.05	1287.87	0.006066	1.36576	0.012067	5.45061	0.00992				222	230
Deptor	222	230	RRRRRLMEL			8	1285.77	Deptor FRB	0.5	1288.54	0.024435	2.03332	0.026569	5.38322	0.003019				222	230
Deptor	222	230	RRRRRLMEL			8	1285.77	Deptor FRB	5	1288.47	0.035295	1.96601	0.036804	5.33871	0.009666				222	230
Deptor	222	230	RRRRRLMEL			8	1285.77	Deptor FRB	50	1288.5	0.01475	1.9961	0.018066	5.29762	0.006379				222	230
Deptor	222	230	RRRRRLMEL			8	1285.77	Deptor alone	0	1286.5	0.010431	0	0	5.52778	0.021726				222	230
Deptor	222	230	RRRRRLMEL			8	1285.77	Deptor alone	0.05	1287.8	0.026804	1.29534	0.028762	5.49978	0.014082				222	230
Deptor	222	230	RRRRRLMEL			8	1285.77	Deptor alone	0.5	1288.59	0.032871	2.08748	0.034487	5.42114	0.014321				222	230
Deptor	222	230	RRRRRLMEL			8	1285.77	Deptor alone	5	1288.52	0.067775	2.01955	0.068573	5.37904	0.007455				222	230
Deptor	222	230	RRRRRLMEL			8	1285.77	Deptor alone	50	1288.5	0.006095	1.99385	0.012082	5.33779	0.010128				222	230
Deptor	222	231	RRRRRLMELL			9	1398.86	Deptor FRB	0	1399.64	0.008583	0	0	7.29176	0.022947				222	231
Deptor	222	231	RRRRRLMELL			9	1398.86	Deptor FRB	0.05	1401.85	0.009588	2.21317	0.012869	7.17379	0.014212				222	231
Deptor	222	231	RRRRRLMELL			9	1398.86	Deptor FRB	0.5	1403.19	0.017451	3.54929	0.019448	7.07515	0.005155				222	231
Deptor	222	231	RRRRRLMELL			9	1398.86	Deptor FRB	5	1403.16	0.022907	3.52156	0.024462	7.03493	0.008087				222	231
Deptor	222	231	RRRRRLMELL			9	1398.86	Deptor FRB	50	1403.12	0.036911	3.47712	0.037895	7.00919	0.000411				222	231
Deptor	222	231	RRRRRLMELL			9	1398.86	Deptor alone	0	1399.64	0.008583	0	0	7.29176	0.022947				222	231
Deptor	222	231	RRRRRLMELL			9	1398.86	Deptor alone	0.05	1401.73	0.021162	2.09258	0.022837	7.23742	0.013938				222	231
Deptor	222	231	RRRRRLMELL			9	1398.86	Deptor alone	0.5	1403.24	0.031143	3.59536	0.032304	7.13729	0.027287				222	231
Deptor	222	231	RRRRRLMELL			9	1398.86	Deptor alone	5	1403.21	0.040612	3.56833	0.041509	7.07653	0.010172				222	231
Deptor	222	231	RRRRRLMELL			9	1398.86	Deptor alone	50	1403.19	0.025314	3.55478	0.02673	7.0452	0.006093				222	231
Deptor	230	248	LLNEKSPSSQETHDSPFCL			16	2132	Deptor FRB	0	2133.36	0.025413	0	0	8.58332	0.022369				230	248
Deptor	230	248	LLNEKSPSSQETHDSPFCL			16	2132	Deptor FRB	0.05	2137.23	0.0422	3.86165	0.049261	8.6095	0.006047				230	248
Deptor	230	248	LLNEKSPSSQETHDSPFCL			16	2132	Deptor FRB	0.5	2137.24	0.029556	3.87325	0.038979	8.59331	0.001321				230	248
Deptor	230	248	LLNEKSPSSQETHDSPFCL			16	2132	Deptor FRB	5	2137.21	0.02821	3.84083	0.037969	8.59385	0.002407				230	248
Deptor	230	248	LLNEKSPSSQETHDSPFCL			16	2132	Deptor FRB	50	2137.27	0.032655	3.90873	0.041379	8.57816	0.010468				230	248
Deptor	230	248	LLNEKSPSSQETHDSPFCL			16	2132	Deptor alone	0	2133.36	0.025413	0	0	8.58332	0.022369				230	248
Deptor	230	248	LLNEKSPSSQETHDSPFCL			16	2132	Deptor alone	0.05	2137.44	0.086522	4.07099	0.090177	8.61842	0.008053				230	248
Deptor	230	248	LLNEKSPSSQETHDSPFCL			16	2132	Deptor alone	0.5	2137.32	0.038911	3.95654	0.046475	8.60066	0.004202				230	248
Deptor	230	248	LLNEKSPSSQETHDSPFCL			16	2132	Deptor alone	5	2137.37	0.039236	4.00242	0.046747	8.60315	0.003352				230	248
Deptor	230	248	LLNEKSPSSQETHDSPFCL			16	2132	Deptor alone	50	2137.39	0.028085	4.0246	0.037876	8.5951	0.007673				230	248
Deptor	231	247	LNEKSPSSQETHDSPFC			14	1905.83	Deptor FRB	0	1906.9	0.006073	0	0	6.23089	0.008011				231	247
Deptor	231	247	LNEKSPSSQETHDSPFC			14	1905.83	Deptor FRB	0.05	1910.73	0.011917	3.83147	0.013375	6.2399	0.004336				231	247
Deptor	231	247	LNEKSPSSQETHDSPFC			14	1905.83	Deptor FRB	0.5	1910.71	0.009488	3.81281	0.011265	6.22832	0.003116				231	247
Deptor	231	247	LNEKSPSSQETHDSPFC			14	1905.83	Deptor FRB	5	1910.71	0.02325	3.81054	0.024031	6.2278	0.004362				231	247
Deptor	231	247	LNEKSPSSQETHDSPFC			14	1905.83	Deptor FRB	50	1910.75	0.021626	3.84862	0.022462	6.22056	0.004873				231	247
Deptor	231	247	LNEKSPSSQETHDSPFC			14	1905.83	Deptor alone	0	1906.9	0.006073	0	0	6.23089	0.008011				231	247
Deptor	231	247	LNEKSPSSQETHDSPFC			14	1905.83	Deptor alone	0.05	1910.92	0.021139	4.02001	0.021995	6.24959	0.003727				231	247
Deptor	231	247	LNEKSPSSQETHDSPFC			14	1905.83	Deptor alone	0.5	1910.85	0.0166	3.94761	0.017676	6.2292	0.005599				231	247
Deptor	231	247	LNEKSPSSQETHDSPFC			14	1905.83	Deptor alone	5	1910.83	0.038043	3.9341	0.038524	6.23018	0.003991				231	247
Deptor	231	247	LNEKSPSSQETHDSPFC			14	1905.83	Deptor alone	50	1910.84	0.0299	3.93961	0.03051	6.22321	0.007148				231	247
Deptor	248	261	LRKQSHDNRKSTSF			13	1703.89	Deptor FRB	0	1704.8	0.012222	0	0	3.45271	0.007992				248	261
Deptor	248	261	LRKQSHDNRKSTSF			13	1703.89	Deptor FRB	0.05	1707.76	0.01209	2.95675	0.017191	3.45332	0.004499				248	261
Deptor	248	261	LRKQSHDNRKSTSF			13	1703.89	Deptor FRB	0.5	1707.78	0.026158	2.97246	0.028873	3.42638	0.002547				248	261
Deptor	248	261	LRKQSHDNRKSTSF			13	1703.89	Deptor FRB	5	1707.74	0.049596	2.93219	0.051079	3.41397	0.009313				248	261
Deptor	248	261	LRKQSHDNRKSTSF			13	1703.89	Deptor FRB	50	1707.76	0.022874	2.95751	0.025935	3.41152	0.005151				248	261
Deptor	248	261	LRKQSHDNRKSTSF			13	1703.89	Deptor alone	0	1704.8	0.012222	0	0	3.45271	0.007992				248	261
Deptor	248	261	LRKQSHDNRKSTSF			13	1703.89	Deptor alone	0.05	1707.77	0.016237	2.96752	0.020323	3.46305	0.011438				248	261
Deptor	248	261	LRKQSHDNRKSTSF			13	1703.89	Deptor alone	0.5	1707.76	0.03816	2.95615	0.040069	3.44119	0.009879				248	261
Deptor	248	261	LRKQSHDNRKSTSF			13	1703.89	Deptor alone	5	1707.76	0.045642	2.95946	0.047251	3.42371	0.009116				248	261
Deptor	248	261	LRKQSHDNRKSTSF			13	1703.89	Deptor alone	50	1707.76	0.019546	2.95265	0.023053	3.41989	0.003671				248	261
Deptor	249	261	RKQSHDNRKSTSF			12	1590.81	Deptor FRB	0	1591.64	0.017815	0	0	2.52009	0.006375				249	261
Deptor	249	261	RKQSHDNRKSTSF			12	1590.81	Deptor FRB	0.05	1594.32	0.027805	2.68779	0.033023	2.51861	0.002792				249	261
Deptor	249	261	RKQSHDNRKSTSF			12	1590.81	Deptor FRB	0.5	1594.36	0.027728	2.72196	0.032958	2.52827	0.001385				249	261
Deptor	249	261	RKQSHDNRKSTSF			12	1590.81	Deptor FRB	5	1594.3	0.03492	2.66289	0.039202	2.51341	0.004647				249	261
Deptor	249	261	RKQSHDNRKSTSF			12	1590.81	Deptor FRB	50	1594.31	0.029125	2.6766	0.034142	2.51531	0.002786				249	261
Deptor	249	261	RKQSHDNRKSTSF			12	1590.81	Deptor alone	0	1591.64	0.017815	0	0	2.52009	0.006375				249	261
Deptor	249	261	RKQSHDNRKSTSF			12	1590.81	Deptor alone	0.05	1594.37	0.044057	2.73846	0.047523	2.52243	0.004952				249	261
Deptor	249	261	RKQSHDNRKSTSF			12	1590.81	Deptor alone	0.5	1594.37	0.035939	2.73685	0.040113	2.525	0.005399				249	261
Deptor	249	261	RKQSHDNRKSTSF			12	1590.81	Deptor alone	5	1594.34	0.07594	2.70425	0.078001	2.52126	0.004256				249	261
Deptor	249	261	RKQSHDNRKSTSF			12	1590.81	Deptor alone	50	1594.35	0.043639	2.71452	0.047135	2.52528	0.001355				249	261
Deptor	262	274	MSVSPSKEIKIVS			11	1404.78	Deptor FRB	0	1405.56	0.007737	0	0	6.47842	0.007162				262	274
Deptor	262	274	MSVSPSKEIKIVS			11	1404.78	Deptor FRB	0.05	1410.99	0.008493	5.42742	0.011489	6.46591	0.004301				262	274
Deptor	262	274	MSVSPSKEIKIVS			11	1404.78	Deptor FRB	0.5	1411.01	0.011606	5.44358	0.013949	6.45495	0.001156				262	274
Deptor	262	274	MSVSPSKEIKIVS			11	1404.78	Deptor FRB	5	1410.99	0.018819	5.42452	0.020347	6.45568	0.003547				262	274
Deptor	262	274	MSVSPSKEIKIVS			11	1404.78	Deptor FRB	50	1411.03	0.013777	5.47065	0.015801	6.44829	0.003735				262	274
Deptor	262	274	MSVSPSKEIKIVS			11	1404.78	Deptor alone	0	1405.56	0.007737	0	0	6.47842	0.007162				262	274
Deptor	262	274	MSVSPSKEIKIVS			11	1404.78	Deptor alone	0.05	1411.14	0.019636	5.57687	0.021105	6.48092	0.004233				262	274
Deptor	262	274	MSVSPSKEIKIVS			11	1404.78	Deptor alone	0.5	1411.12	0.00656	5.55448	0.010143	6.46257	0.006563				262	274
Deptor	262	274	MSVSPSKEIKIVS			11	1404.78	Deptor alone	5	1411.09	0.033402	5.52633	0.034286	6.46542	0.00374				262	274
Deptor	262	274	MSVSPSKEIKIVS			11	1404.78	Deptor alone	50	1411.11	0.014969	5.54346	0.016851	6.45905	0.006448				262	274
Deptor	262	275	MSVSPSKEIKIVSA			12	1475.81	Deptor FRB	0	1476.66	0.003181	0	0	6.67252	0.007673				262	275
Deptor	262	275	MSVSPSKEIKIVSA			12	1475.81	Deptor FRB	0.05	1482.63	0.006294	5.97275	0.007052	6.64925	0.004145				262	275
Deptor	262	275	MSVSPSKEIKIVSA			12	1475.81	Deptor FRB	0.5	1482.63	0.003904	5.97077	0.005036	6.63826	0.001131				262	275
Deptor	262	275	MSVSPSKEIKIVSA			12	1475.81	Deptor FRB	5	1482.6	0.014294	5.94633	0.014644	6.63989	0.003659				262	275
Deptor	262	275	MSVSPSKEIKIVSA			12	1475.81	Deptor FRB	50	1482.62	0.022314	5.96725	0.02254	6.634	0.003983				262	275
Deptor	262	275	MSVSPSKEIKIVSA			12	1475.81	Deptor alone	0	1476.66	0.003181	0	0	6.67252	0.007673				262	275
Deptor	262	275	MSVSPSKEIKIVSA			12	1475.81	Deptor alone	0.05	1482.78	0.027103	6.12162	0.027289	6.66646	0.003446				262	275
Deptor	262	275	MSVSPSKEIKIVSA			12	1475.81	Deptor alone	0.5	1482.74	0.005396	6.08479	0.006264	6.64724	0.006364				262	275
Deptor	262	275	MSVSPSKEIKIVSA			12	1475.81	Deptor alone	5	1482.71	0.030592	6.05292	0.030757	6.65178	0.004131				262	275
Deptor	262	275	MSVSPSKEIKIVSA			12	1475.81	Deptor alone	50	1482.71	0.049907	6.05058	0.050008	6.64528	0.006728				262	275
Deptor	263	269	SVSPSKE			5	733.373	Deptor FRB	0	733.701	0.001864	0	0	4.14758	0.006585				263	269
Deptor	263	269	SVSPSKE			5	733.373	Deptor FRB	0.05	736.321	0.008683	2.61978	0.008881	4.16305	0.005026				263	269
Deptor	263	269	SVSPSKE			5	733.373	Deptor FRB	0.5	736.337	0.007185	2.63539	0.007423	4.16022	0.001362				263	269
Deptor	263	269	SVSPSKE			5	733.373	Deptor FRB	5	736.313	0.016458	2.61215	0.016564	4.15099	0.002666				263	269
Deptor	263	269	SVSPSKE			5	733.373	Deptor FRB	50	736.334	0.011302	2.63256	0.011455	4.1468	0.005281				263	269
Deptor	263	269	SVSPSKE			5	733.373	Deptor alone	0	733.701	0.001864	0	0	4.14758	0.006585				263	269
Deptor	263	269	SVSPSKE			5	733.373	Deptor alone	0.05	736.38	0.015941	2.67862	0.016049	4.16601	0.00653				263	269
Deptor	263	269	SVSPSKE			5	733.373	Deptor alone	0.5	736.359	0.000461	2.65781	0.00192	4.1597	0.006788				263	269
Deptor	263	269	SVSPSKE			5	733.373	Deptor alone	5	736.333	0.020677	2.63222	0.020761	4.15781	0.007215				263	269
Deptor	263	269	SVSPSKE			5	733.373	Deptor alone	50	736.351	0.012621	2.64961	0.012758	4.15562	0.006234				263	269
Deptor	270	288	IKIVSAVRRSSMSSCGSSG			18	1911.97	Deptor FRB	0	1913.2	0.004994	0	0	5.4155	0.008115				270	288
Deptor	270	288	IKIVSAVRRSSMSSCGSSG			18	1911.97	Deptor FRB	0.05	1920.02	0.084339	6.81511	0.084486	5.36062	0.00213				270	288
Deptor	270	288	IKIVSAVRRSSMSSCGSSG			18	1911.97	Deptor FRB	0.5	1919.9	0.052471	6.69476	0.052708	5.33613	0.003043				270	288
Deptor	270	288	IKIVSAVRRSSMSSCGSSG			18	1911.97	Deptor FRB	5	1920.03	0.095627	6.82438	0.095758	5.32945	0.003823				270	288
Deptor	270	288	IKIVSAVRRSSMSSCGSSG			18	1911.97	Deptor FRB	50	1919.94	0.199021	6.73958	0.199083	5.31917	0.004636				270	288
Deptor	270	288	IKIVSAVRRSSMSSCGSSG			18	1911.97	Deptor alone	0	1913.2	0.004994	0	0	5.4155	0.008115				270	288
Deptor	270	288	IKIVSAVRRSSMSSCGSSG			18	1911.97	Deptor alone	0.05	1920.26	0.024413	7.06077	0.024919	5.38298	0.001589				270	288
Deptor	270	288	IKIVSAVRRSSMSSCGSSG			18	1911.97	Deptor alone	0.5	1920.17	0.071686	6.96788	0.071859	5.34926	0.009119				270	288
Deptor	270	288	IKIVSAVRRSSMSSCGSSG			18	1911.97	Deptor alone	5	1920.06	0.127929	6.85418	0.128026	5.33941	0.003323				270	288
Deptor	270	288	IKIVSAVRRSSMSSCGSSG			18	1911.97	Deptor alone	50	1920.1	0.066766	6.89813	0.066953	5.33054	0.006574				270	288
Deptor	275	289	AVRRSSMSSCGSSGY			14	1534.67	Deptor FRB	0	1535.61	0.010708	0	0	4.60375	0.018047				275	289
Deptor	275	289	AVRRSSMSSCGSSGY			14	1534.67	Deptor FRB	0.05	1539.3	0.025281	3.68563	0.027455	4.62596	0.003135				275	289
Deptor	275	289	AVRRSSMSSCGSSGY			14	1534.67	Deptor FRB	0.5	1539.26	0.010525	3.65297	0.015014	4.61678	0.001648				275	289
Deptor	275	289	AVRRSSMSSCGSSGY			14	1534.67	Deptor FRB	5	1539.29	0.031444	3.67522	0.033218	4.60968	0.0021				275	289
Deptor	275	289	AVRRSSMSSCGSSGY			14	1534.67	Deptor FRB	50	1539.31	0.026752	3.70201	0.028815	4.60266	0.00356				275	289
Deptor	275	289	AVRRSSMSSCGSSGY			14	1534.67	Deptor alone	0	1535.61	0.010708	0	0	4.60375	0.018047				275	289
Deptor	275	289	AVRRSSMSSCGSSGY			14	1534.67	Deptor alone	0.05	1539.48	0.02258	3.86757	0.02499	4.63678	0.004458				275	289
Deptor	275	289	AVRRSSMSSCGSSGY			14	1534.67	Deptor alone	0.5	1539.38	0.032092	3.77213	0.033831	4.62164	0.005977				275	289
Deptor	275	289	AVRRSSMSSCGSSGY			14	1534.67	Deptor alone	5	1539.38	0.04574	3.76711	0.046977	4.61864	0.003792				275	289
Deptor	275	289	AVRRSSMSSCGSSGY			14	1534.67	Deptor alone	50	1539.38	0.035298	3.76774	0.036886	4.61327	0.006843				275	289
Deptor	276	289	VRRSSMSSCGSSGY			13	1463.64	Deptor FRB	0	1464.45	0.004793	0	0	4.54738	0.008416				276	289
Deptor	276	289	VRRSSMSSCGSSGY			13	1463.64	Deptor FRB	0.05	1467.75	0.026022	3.29547	0.02646	4.55671	0.002891				276	289
Deptor	276	289	VRRSSMSSCGSSGY			13	1463.64	Deptor FRB	0.5	1467.7	0.023486	3.24114	0.02397	4.54581	0.001917				276	289
Deptor	276	289	VRRSSMSSCGSSGY			13	1463.64	Deptor FRB	5	1467.71	0.028561	3.25777	0.028961	4.53814	0.002637				276	289
Deptor	276	289	VRRSSMSSCGSSGY			13	1463.64	Deptor FRB	50	1467.73	0.023886	3.27662	0.024362	4.5309	0.003695				276	289
Deptor	276	289	VRRSSMSSCGSSGY			13	1463.64	Deptor alone	0	1464.45	0.004793	0	0	4.54738	0.008416				276	289
Deptor	276	289	VRRSSMSSCGSSGY			13	1463.64	Deptor alone	0.05	1467.9	0.028991	3.44403	0.029385	4.56929	0.003198				276	289
Deptor	276	289	VRRSSMSSCGSSGY			13	1463.64	Deptor alone	0.5	1467.81	0.024303	3.35281	0.024771	4.552	0.005505				276	289
Deptor	276	289	VRRSSMSSCGSSGY			13	1463.64	Deptor alone	5	1467.79	0.04821	3.33693	0.048448	4.54804	0.004629				276	289
Deptor	276	289	VRRSSMSSCGSSGY			13	1463.64	Deptor alone	50	1467.78	0.035878	3.32815	0.036197	4.54162	0.007007				276	289
Deptor	276	296	VRRSSMSSCGSSGYFSSSPTL			19	2182.99	Deptor FRB	0	2184.33	0.062063	0	0	7.57281	0.006854				276	296
Deptor	276	296	VRRSSMSSCGSSGYFSSSPTL			19	2182.99	Deptor FRB	0.05	2189.67	0.048332	5.33522	0.078663	7.57328	0.00315				276	296
Deptor	276	296	VRRSSMSSCGSSGYFSSSPTL			19	2182.99	Deptor FRB	0.5	2189.65	0.062575	5.31858	0.088133	7.55793	0.000928				276	296
Deptor	276	296	VRRSSMSSCGSSGYFSSSPTL			19	2182.99	Deptor FRB	5	2189.68	0.052184	5.35161	0.081087	7.55683	0.003209				276	296
Deptor	276	296	VRRSSMSSCGSSGYFSSSPTL			19	2182.99	Deptor FRB	50	2189.72	0.078642	5.39037	0.100182	7.55089	0.002082				276	296
Deptor	276	296	VRRSSMSSCGSSGYFSSSPTL			19	2182.99	Deptor alone	0	2184.33	0.062063	0	0	7.57281	0.006854				276	296
Deptor	276	296	VRRSSMSSCGSSGYFSSSPTL			19	2182.99	Deptor alone	0.05	2189.99	0.053963	5.65679	0.082243	7.59399	0.002415				276	296
Deptor	276	296	VRRSSMSSCGSSGYFSSSPTL			19	2182.99	Deptor alone	0.5	2189.94	0.013977	5.61143	0.063617	7.56978	0.005081				276	296
Deptor	276	296	VRRSSMSSCGSSGYFSSSPTL			19	2182.99	Deptor alone	5	2189.92	0.032795	5.58959	0.070195	7.57175	0.004996				276	296
Deptor	276	296	VRRSSMSSCGSSGYFSSSPTL			19	2182.99	Deptor alone	50	2189.87	0.038042	5.53885	0.072795	7.56485	0.006814				276	296
Deptor	282	289	SSCGSSGY			7	747.261	Deptor FRB	0	747.672	0.0088	0	0	4.50339	0.006296				282	289
Deptor	282	289	SSCGSSGY			7	747.261	Deptor FRB	0.05	750.241	0.054471	2.56906	0.055177	4.52247	0.00489				282	289
Deptor	282	289	SSCGSSGY			7	747.261	Deptor FRB	0.5	750.296	0.016067	2.62419	0.018319	4.51926	0.001121				282	289
Deptor	282	289	SSCGSSGY			7	747.261	Deptor FRB	5	750.271	0.03612	2.59957	0.037177	4.50942	0.001708				282	289
Deptor	282	289	SSCGSSGY			7	747.261	Deptor FRB	50	750.302	0.028955	2.6303	0.030263	4.5048	0.004866				282	289
Deptor	282	289	SSCGSSGY			7	747.261	Deptor alone	0	747.672	0.0088	0	0	4.50339	0.006296				282	289
Deptor	282	289	SSCGSSGY			7	747.261	Deptor alone	0.05	750.227	0.027074	2.55533	0.028468	4.52584	0.006581				282	289
Deptor	282	289	SSCGSSGY			7	747.261	Deptor alone	0.5	750.325	0.035024	2.65324	0.036113	4.51901	0.006792				282	289
Deptor	282	289	SSCGSSGY			7	747.261	Deptor alone	5	750.308	0.026514	2.63681	0.027936	4.5165	0.005661				282	289
Deptor	282	289	SSCGSSGY			7	747.261	Deptor alone	50	750.326	0.010666	2.65486	0.013828	4.51335	0.006511				282	289
Deptor	289	318	YFSSSPTLSSSPPVLCNPKSVLKRPVTSEE			24	3236.65	Deptor FRB	0	3238.59	0.015537	0	0	7.8074	0.00566				289	318
Deptor	289	318	YFSSSPTLSSSPPVLCNPKSVLKRPVTSEE			24	3236.65	Deptor FRB	0.05	3249.73	0.027813	11.1402	0.031859	7.77826	0.006117				289	318
Deptor	289	318	YFSSSPTLSSSPPVLCNPKSVLKRPVTSEE			24	3236.65	Deptor FRB	0.5	3250.18	0.033469	11.5944	0.0369	7.7693	0.002372				289	318
Deptor	289	318	YFSSSPTLSSSPPVLCNPKSVLKRPVTSEE			24	3236.65	Deptor FRB	5	3250.16	0.028238	11.5791	0.032231	7.77539	0.003947				289	318
Deptor	289	318	YFSSSPTLSSSPPVLCNPKSVLKRPVTSEE			24	3236.65	Deptor FRB	50	3250.21	0.0251	11.6251	0.02952	7.7232	0.071137				289	318
Deptor	289	318	YFSSSPTLSSSPPVLCNPKSVLKRPVTSEE			24	3236.65	Deptor alone	0	3238.59	0.015537	0	0	7.8074	0.00566				289	318
Deptor	289	318	YFSSSPTLSSSPPVLCNPKSVLKRPVTSEE			24	3236.65	Deptor alone	0.05	3249.8	0.040153	11.2165	0.043054	7.8039	0.005995				289	318
Deptor	289	318	YFSSSPTLSSSPPVLCNPKSVLKRPVTSEE			24	3236.65	Deptor alone	0.5	3250.22	0.021855	11.6334	0.026815	7.78422	0.006033				289	318
Deptor	289	318	YFSSSPTLSSSPPVLCNPKSVLKRPVTSEE			24	3236.65	Deptor alone	5	3250.19	0.042354	11.6086	0.045114	7.79016	0.004188				289	318
Deptor	289	318	YFSSSPTLSSSPPVLCNPKSVLKRPVTSEE			24	3236.65	Deptor alone	50	3250.25	0.034896	11.6595	0.038199	7.7848	0.006214				289	318
Deptor	290	318	FSSSPTLSSSPPVLCNPKSVLKRPVTSEE			23	3073.59	Deptor FRB	0	3075.39	0.019835	0	0	7.4919	0.006691				290	318
Deptor	290	318	FSSSPTLSSSPPVLCNPKSVLKRPVTSEE			23	3073.59	Deptor FRB	0.05	3086.54	0.016489	11.1471	0.025793	7.47512	0.004349				290	318
Deptor	290	318	FSSSPTLSSSPPVLCNPKSVLKRPVTSEE			23	3073.59	Deptor FRB	0.5	3086.96	0.030915	11.5702	0.036731	7.46381	0.001386				290	318
Deptor	290	318	FSSSPTLSSSPPVLCNPKSVLKRPVTSEE			23	3073.59	Deptor FRB	5	3086.93	0.048468	11.541	0.05237	7.46699	0.004335				290	318
Deptor	290	318	FSSSPTLSSSPPVLCNPKSVLKRPVTSEE			23	3073.59	Deptor FRB	50	3086.98	0.030592	11.5919	0.036459	7.46193	0.003175				290	318
Deptor	290	318	FSSSPTLSSSPPVLCNPKSVLKRPVTSEE			23	3073.59	Deptor alone	0	3075.39	0.019835	0	0	7.4919	0.006691				290	318
Deptor	290	318	FSSSPTLSSSPPVLCNPKSVLKRPVTSEE			23	3073.59	Deptor alone	0.05	3086.61	0.028068	11.2206	0.034369	7.49379	0.00384				290	318
Deptor	290	318	FSSSPTLSSSPPVLCNPKSVLKRPVTSEE			23	3073.59	Deptor alone	0.5	3087.04	0.022321	11.6483	0.02986	7.47513	0.006262				290	318
Deptor	290	318	FSSSPTLSSSPPVLCNPKSVLKRPVTSEE			23	3073.59	Deptor alone	5	3087	0.050693	11.6081	0.054435	7.48011	0.00448				290	318
Deptor	290	318	FSSSPTLSSSPPVLCNPKSVLKRPVTSEE			23	3073.59	Deptor alone	50	3087.04	0.042423	11.6489	0.046831	7.47448	0.006336				290	318
Deptor	291	318	SSSPTLSSSPPVLCNPKSVLKRPVTSEE			22	2926.52	Deptor FRB	0	2928.29	0.014023	0	0	7.20378	0.006894				291	318
Deptor	291	318	SSSPTLSSSPPVLCNPKSVLKRPVTSEE			22	2926.52	Deptor FRB	0.05	2939.05	0.042686	10.7605	0.04493	7.192	0.006079				291	318
Deptor	291	318	SSSPTLSSSPPVLCNPKSVLKRPVTSEE			22	2926.52	Deptor FRB	0.5	2939.52	0.067055	11.2249	0.068506	7.18132	0.002506				291	318
Deptor	291	318	SSSPTLSSSPPVLCNPKSVLKRPVTSEE			22	2926.52	Deptor FRB	5	2939.46	0.047913	11.1656	0.049923	7.18505	0.004079				291	318
Deptor	291	318	SSSPTLSSSPPVLCNPKSVLKRPVTSEE			22	2926.52	Deptor FRB	50	2939.53	0.043753	11.2395	0.045945	7.17706	0.004418				291	318
Deptor	291	318	SSSPTLSSSPPVLCNPKSVLKRPVTSEE			22	2926.52	Deptor alone	0	2928.29	0.014023	0	0	7.20378	0.006894				291	318
Deptor	291	318	SSSPTLSSSPPVLCNPKSVLKRPVTSEE			22	2926.52	Deptor alone	0.05	2939.17	0.050257	10.8785	0.052177	7.2038	0.004162				291	318
Deptor	291	318	SSSPTLSSSPPVLCNPKSVLKRPVTSEE			22	2926.52	Deptor alone	0.5	2939.64	0.044351	11.3496	0.046515	7.18626	0.006176				291	318
Deptor	291	318	SSSPTLSSSPPVLCNPKSVLKRPVTSEE			22	2926.52	Deptor alone	5	2939.58	0.055937	11.2903	0.057668	7.19093	0.003932				291	318
Deptor	291	318	SSSPTLSSSPPVLCNPKSVLKRPVTSEE			22	2926.52	Deptor alone	50	2939.63	0.027483	11.3397	0.030854	7.18595	0.006535				291	318
Deptor	300	318	PPVLCNPKSVLKRPVTSEE			14	2093.14	Deptor FRB	0	2094.5	0.049759	0	0	6.62472	0.007931				300	318
Deptor	300	318	PPVLCNPKSVLKRPVTSEE			14	2093.14	Deptor FRB	0.05	2102.07	0.017948	7.57331	0.052897	6.60478	0.004216				300	318
Deptor	300	318	PPVLCNPKSVLKRPVTSEE			14	2093.14	Deptor FRB	0.5	2102.48	0.06249	7.97687	0.07988	6.59196	0.001276				300	318
Deptor	300	318	PPVLCNPKSVLKRPVTSEE			14	2093.14	Deptor FRB	5	2102.43	0.055831	7.9322	0.074786	6.59366	0.003884				300	318
Deptor	300	318	PPVLCNPKSVLKRPVTSEE			14	2093.14	Deptor FRB	50	2102.51	0.01255	8.01443	0.051317	6.58729	0.003997				300	318
Deptor	300	318	PPVLCNPKSVLKRPVTSEE			14	2093.14	Deptor alone	0	2094.5	0.049759	0	0	6.62472	0.007931				300	318
Deptor	300	318	PPVLCNPKSVLKRPVTSEE			14	2093.14	Deptor alone	0.05	2102.11	0.006937	7.6067	0.05024	6.62118	0.002951				300	318
Deptor	300	318	PPVLCNPKSVLKRPVTSEE			14	2093.14	Deptor alone	0.5	2102.6	0.100167	8.09625	0.111846	6.59976	0.005903				300	318
Deptor	300	318	PPVLCNPKSVLKRPVTSEE			14	2093.14	Deptor alone	5	2102.55	0.031913	8.054	0.059113	6.60374	0.004151				300	318
Deptor	300	318	PPVLCNPKSVLKRPVTSEE			14	2093.14	Deptor alone	50	2102.61	0.068178	8.10976	0.084405	6.59782	0.006557				300	318
Deptor	304	317	CNPKSVLKRPVTSE			11	1557.84	Deptor FRB	0	1558.71	0.020501	0	0	4.62909	0.033102				304	317
Deptor	304	317	CNPKSVLKRPVTSE			11	1557.84	Deptor FRB	0.05	1564.59	0.063269	5.87136	0.066507	4.64195	0.003017				304	317
Deptor	304	317	CNPKSVLKRPVTSE			11	1557.84	Deptor FRB	0.5	1564.89	0.060869	6.17577	0.064229	4.63128	0.00197				304	317
Deptor	304	317	CNPKSVLKRPVTSE			11	1557.84	Deptor FRB	5	1564.85	0.081959	6.13135	0.084484	4.6255	0.003036				304	317
Deptor	304	317	CNPKSVLKRPVTSE			11	1557.84	Deptor FRB	50	1564.87	0.074936	6.15245	0.07769	4.61852	0.003349				304	317
Deptor	304	317	CNPKSVLKRPVTSE			11	1557.84	Deptor alone	0	1558.71	0.020501	0	0	4.62909	0.033102				304	317
Deptor	304	317	CNPKSVLKRPVTSE			11	1557.84	Deptor alone	0.05	1564.63	0.060222	5.91964	0.063615	4.6552	0.002618				304	317
Deptor	304	317	CNPKSVLKRPVTSE			11	1557.84	Deptor alone	0.5	1564.96	0.05412	6.24264	0.057873	4.6381	0.00661				304	317
Deptor	304	317	CNPKSVLKRPVTSE			11	1557.84	Deptor alone	5	1564.91	0.091359	6.19224	0.093631	4.6357	0.005335				304	317
Deptor	304	317	CNPKSVLKRPVTSE			11	1557.84	Deptor alone	50	1564.91	0.078501	6.19225	0.081134	4.62962	0.005853				304	317
Deptor	304	318	CNPKSVLKRPVTSEE			12	1686.88	Deptor FRB	0	1687.86	0.013167	0	0	4.74269	0.012038				304	318
Deptor	304	318	CNPKSVLKRPVTSEE			12	1686.88	Deptor FRB	0.05	1693.74	0.033285	5.87883	0.035794	4.7371	0.003104				304	318
Deptor	304	318	CNPKSVLKRPVTSEE			12	1686.88	Deptor FRB	0.5	1694.19	0.035773	6.32572	0.038119	4.72457	0.00186				304	318
Deptor	304	318	CNPKSVLKRPVTSEE			12	1686.88	Deptor FRB	5	1694.15	0.052757	6.29048	0.054375	4.71896	0.003274				304	318
Deptor	304	318	CNPKSVLKRPVTSEE			12	1686.88	Deptor FRB	50	1694.18	0.039014	6.31802	0.041176	4.71138	0.003076				304	318
Deptor	304	318	CNPKSVLKRPVTSEE			12	1686.88	Deptor alone	0	1687.86	0.013167	0	0	4.74269	0.012038				304	318
Deptor	304	318	CNPKSVLKRPVTSEE			12	1686.88	Deptor alone	0.05	1693.77	0.028009	5.91053	0.03095	4.75099	0.0028				304	318
Deptor	304	318	CNPKSVLKRPVTSEE			12	1686.88	Deptor alone	0.5	1694.26	0.028439	6.3986	0.031339	4.73348	0.006194				304	318
Deptor	304	318	CNPKSVLKRPVTSEE			12	1686.88	Deptor alone	5	1694.21	0.05929	6.35134	0.060734	4.73074	0.005475				304	318
Deptor	304	318	CNPKSVLKRPVTSEE			12	1686.88	Deptor alone	50	1694.21	0.036598	6.35351	0.038894	4.72449	0.00594				304	318
Deptor	304	319	CNPKSVLKRPVTSEEL			13	1799.97	Deptor FRB	0	1801.48	0.044019	0	0	5.97498	0.008343				304	319
Deptor	304	319	CNPKSVLKRPVTSEEL			13	1799.97	Deptor FRB	0.05	1806.47	0.0493	4.9918	0.066092	5.95683	0.003089				304	319
Deptor	304	319	CNPKSVLKRPVTSEEL			13	1799.97	Deptor FRB	0.5	1807.56	0.01943	6.07554	0.048116	5.93937	0.002522				304	319
Deptor	304	319	CNPKSVLKRPVTSEEL			13	1799.97	Deptor FRB	5	1807.87	0.053127	6.38957	0.068994	5.93856	0.003771				304	319
Deptor	304	319	CNPKSVLKRPVTSEEL			13	1799.97	Deptor FRB	50	1808.18	0.06931	6.69593	0.082107	5.93201	0.0034				304	319
Deptor	304	319	CNPKSVLKRPVTSEEL			13	1799.97	Deptor alone	0	1801.48	0.044019	0	0	5.97498	0.008343				304	319
Deptor	304	319	CNPKSVLKRPVTSEEL			13	1799.97	Deptor alone	0.05	1806.46	0.043995	4.98251	0.062235	5.97816	0.003146				304	319
Deptor	304	319	CNPKSVLKRPVTSEEL			13	1799.97	Deptor alone	0.5	1807.6	0.017169	6.11865	0.047248	5.95172	0.006215				304	319
Deptor	304	319	CNPKSVLKRPVTSEEL			13	1799.97	Deptor alone	5	1807.94	0.054794	6.45765	0.070285	5.95292	0.005724				304	319
Deptor	304	319	CNPKSVLKRPVTSEEL			13	1799.97	Deptor alone	50	1808.16	0.085851	6.67658	0.096479	5.94816	0.00563				304	319
Deptor	315	329	TSEELLTPGAPYARK			12	1632.86	Deptor FRB	0	1633.86	0.007544	0	0	4.74345	0.011769				315	329
Deptor	315	329	TSEELLTPGAPYARK			12	1632.86	Deptor FRB	0.05	1638.83	0.03852	4.97354	0.039252	4.73841	0.004035				315	329
Deptor	315	329	TSEELLTPGAPYARK			12	1632.86	Deptor FRB	0.5	1639.09	0.026366	5.23932	0.027424	4.72546	0.001347				315	329
Deptor	315	329	TSEELLTPGAPYARK			12	1632.86	Deptor FRB	5	1639.11	0.120205	5.25704	0.120441	4.71918	0.003464				315	329
Deptor	315	329	TSEELLTPGAPYARK			12	1632.86	Deptor FRB	50	1639.04	0.039728	5.18171	0.040438	4.71204	0.003439				315	329
Deptor	315	329	TSEELLTPGAPYARK			12	1632.86	Deptor alone	0	1633.86	0.007544	0	0	4.74345	0.011769				315	329
Deptor	315	329	TSEELLTPGAPYARK			12	1632.86	Deptor alone	0.05	1638.85	0.060548	4.99316	0.061016	4.75174	0.002304				315	329
Deptor	315	329	TSEELLTPGAPYARK			12	1632.86	Deptor alone	0.5	1639.31	0.006445	5.45207	0.009922	4.73544	0.006588				315	329
Deptor	315	329	TSEELLTPGAPYARK			12	1632.86	Deptor alone	5	1639.23	0.029575	5.37852	0.030522	4.73205	0.006187				315	329
Deptor	315	329	TSEELLTPGAPYARK			12	1632.86	Deptor alone	50	1639.24	0.031573	5.38588	0.032462	4.72613	0.005305				315	329
Deptor	320	332	LTPGAPYARKTFT			10	1422.77	Deptor FRB	0	1423.75	0.010966	0	0	5.84044	0.00696				320	332
Deptor	320	332	LTPGAPYARKTFT			10	1422.77	Deptor FRB	0.05	1426.2	0.035439	2.45661	0.037097	5.84158	0.003953				320	332
Deptor	320	332	LTPGAPYARKTFT			10	1422.77	Deptor FRB	0.5	1427.12	0.019688	3.37084	0.022536	5.82708	0.001027				320	332
Deptor	320	332	LTPGAPYARKTFT			10	1422.77	Deptor FRB	5	1427.98	0.052116	4.23525	0.053257	5.82381	0.002866				320	332
Deptor	320	332	LTPGAPYARKTFT			10	1422.77	Deptor FRB	50	1428.41	0.027067	4.66726	0.029204	5.81444	0.003928				320	332
Deptor	320	332	LTPGAPYARKTFT			10	1422.77	Deptor alone	0	1423.75	0.010966	0	0	5.84044	0.00696				320	332
Deptor	320	332	LTPGAPYARKTFT			10	1422.77	Deptor alone	0.05	1426.19	0.016555	2.44303	0.019857	5.85938	0.004589				320	332
Deptor	320	332	LTPGAPYARKTFT			10	1422.77	Deptor alone	0.5	1427.16	0.015533	3.41639	0.019014	5.83848	0.006316				320	332
Deptor	320	332	LTPGAPYARKTFT			10	1422.77	Deptor alone	5	1427.99	0.027056	4.24769	0.029194	5.83705	0.003165				320	332
Deptor	320	332	LTPGAPYARKTFT			10	1422.77	Deptor alone	50	1428.52	0.113932	4.76992	0.114459	5.82904	0.007052				320	332
Deptor	320	335	LTPGAPYARKTFTIVG			13	1691.95	Deptor FRB	0	1692.91	0.013814	0	0	7.44758	0.007094				320	335
Deptor	320	335	LTPGAPYARKTFTIVG			13	1691.95	Deptor FRB	0.05	1695.48	0.016298	2.56833	0.021364	7.45059	0.004623				320	335
Deptor	320	335	LTPGAPYARKTFTIVG			13	1691.95	Deptor FRB	0.5	1697.3	0.019476	4.39543	0.023878	7.43306	0.00123				320	335
Deptor	320	335	LTPGAPYARKTFTIVG			13	1691.95	Deptor FRB	5	1698.44	0.011545	5.53005	0.018003	7.43101	0.003866				320	335
Deptor	320	335	LTPGAPYARKTFTIVG			13	1691.95	Deptor FRB	50	1698.93	0.018213	6.01983	0.022859	7.42274	0.003568				320	335
Deptor	320	335	LTPGAPYARKTFTIVG			13	1691.95	Deptor alone	0	1692.91	0.013814	0	0	7.44758	0.007094				320	335
Deptor	320	335	LTPGAPYARKTFTIVG			13	1691.95	Deptor alone	0.05	1695.39	0.006275	2.48434	0.015172	7.4651	0.003556				320	335
Deptor	320	335	LTPGAPYARKTFTIVG			13	1691.95	Deptor alone	0.5	1697.37	0.020119	4.46017	0.024404	7.43973	0.005878				320	335
Deptor	320	335	LTPGAPYARKTFTIVG			13	1691.95	Deptor alone	5	1698.5	0.027422	5.58773	0.030705	7.43981	0.004109				320	335
Deptor	320	335	LTPGAPYARKTFTIVG			13	1691.95	Deptor alone	50	1698.97	0.021631	6.06272	0.025665	7.43243	0.006413				320	335
Deptor	321	331	TPGAPYARKTF			8	1208.64	Deptor FRB	0	1209.35	0.025331	0	0	6.85472	0.007767				321	331
Deptor	321	331	TPGAPYARKTF			8	1208.64	Deptor FRB	0.05	1211.43	0.041747	2.07836	0.048831	6.85037	0.003701				321	331
Deptor	321	331	TPGAPYARKTF			8	1208.64	Deptor FRB	0.5	1212.5	0.015859	3.15002	0.029886	6.83497	0.001708				321	331
Deptor	321	331	TPGAPYARKTF			8	1208.64	Deptor FRB	5	1213.3	0.036825	3.94419	0.044696	6.83174	0.003358				321	331
Deptor	321	331	TPGAPYARKTF			8	1208.64	Deptor FRB	50	1213.65	0.077169	4.2993	0.081221	6.82157	0.003842				321	331
Deptor	321	331	TPGAPYARKTF			8	1208.64	Deptor alone	0	1209.35	0.025331	0	0	6.85472	0.007767				321	331
Deptor	321	331	TPGAPYARKTF			8	1208.64	Deptor alone	0.05	1211.33	0.027581	1.97777	0.037448	6.87182	0.002702				321	331
Deptor	321	331	TPGAPYARKTF			8	1208.64	Deptor alone	0.5	1212.57	0.012866	3.21763	0.028411	6.84723	0.00594				321	331
Deptor	321	331	TPGAPYARKTF			8	1208.64	Deptor alone	5	1213.38	0.061858	4.02108	0.066844	6.84646	0.004765				321	331
Deptor	321	331	TPGAPYARKTF			8	1208.64	Deptor alone	50	1213.71	0.049051	4.35175	0.055206	6.83731	0.006928				321	331
Deptor	321	332	TPGAPYARKTFT			9	1309.69	Deptor FRB	0	1310.44	0.013588	0	0	6.70562	0.00714				321	332
Deptor	321	332	TPGAPYARKTFT			9	1309.69	Deptor FRB	0.05	1312.85	0.036645	2.40521	0.039083	6.70713	0.004503				321	332
Deptor	321	332	TPGAPYARKTFT			9	1309.69	Deptor FRB	0.5	1313.94	0.013167	3.50213	0.018921	6.6924	0.00084				321	332
Deptor	321	332	TPGAPYARKTFT			9	1309.69	Deptor FRB	5	1314.71	0.060055	4.27153	0.061573	6.69055	0.003417				321	332
Deptor	321	332	TPGAPYARKTFT			9	1309.69	Deptor FRB	50	1315.06	0.038565	4.61721	0.040889	6.68301	0.003756				321	332
Deptor	321	332	TPGAPYARKTFT			9	1309.69	Deptor alone	0	1310.44	0.013588	0	0	6.70562	0.00714				321	332
Deptor	321	332	TPGAPYARKTFT			9	1309.69	Deptor alone	0.05	1312.77	0.016545	2.3304	0.02141	6.72496	0.0042				321	332
Deptor	321	332	TPGAPYARKTFT			9	1309.69	Deptor alone	0.5	1314	0.017522	3.55475	0.022173	6.70231	0.006117				321	332
Deptor	321	332	TPGAPYARKTFT			9	1309.69	Deptor alone	5	1314.82	0.046049	4.37893	0.048012	6.70273	0.003726				321	332
Deptor	321	332	TPGAPYARKTFT			9	1309.69	Deptor alone	50	1315.07	0.032476	4.63214	0.035204	6.69628	0.006833				321	332
Deptor	332	342	TIVGDAVGWGF			10	1121.56	Deptor FRB	0	1122.25	0.006949	0	0	11.4036	0.003277				332	342
Deptor	332	342	TIVGDAVGWGF			10	1121.56	Deptor FRB	0.05	1125.85	0.020611	3.60626	0.021751	11.4279	0.007472				332	342
Deptor	332	342	TIVGDAVGWGF			10	1121.56	Deptor FRB	0.5	1126.82	0.016859	4.57603	0.018235	11.4134	0.000682				332	342
Deptor	332	342	TIVGDAVGWGF			10	1121.56	Deptor FRB	5	1127.1	0.03169	4.84893	0.032443	11.415	0.006089				332	342
Deptor	332	342	TIVGDAVGWGF			10	1121.56	Deptor FRB	50	1127.13	0.036775	4.88186	0.037426	11.4086	0.006837				332	342
Deptor	332	342	TIVGDAVGWGF			10	1121.56	Deptor alone	0	1122.25	0.006949	0	0	11.4036	0.003277				332	342
Deptor	332	342	TIVGDAVGWGF			10	1121.56	Deptor alone	0.05	1125.83	0.014702	3.58094	0.016262	11.4337	0.006417				332	342
Deptor	332	342	TIVGDAVGWGF			10	1121.56	Deptor alone	0.5	1126.88	0.018836	4.6284	0.020077	11.413	0.006525				332	342
Deptor	332	342	TIVGDAVGWGF			10	1121.56	Deptor alone	5	1127.14	0.015341	4.88922	0.016841	11.4134	0.007584				332	342
Deptor	332	342	TIVGDAVGWGF			10	1121.56	Deptor alone	50	1127.14	0.017464	4.88807	0.018796	11.4142	0.00736				332	342
Deptor	333	342	IVGDAVGWGF			9	1020.51	Deptor FRB	0	1021.08	0.003626	0	0	11.0178	0.002146				333	342
Deptor	333	342	IVGDAVGWGF			9	1020.51	Deptor FRB	0.05	1024.09	0.013857	3.00583	0.014324	11.0478	0.007019				333	342
Deptor	333	342	IVGDAVGWGF			9	1020.51	Deptor FRB	0.5	1024.37	0.007941	3.28995	0.008729	11.0373	0.001055				333	342
Deptor	333	342	IVGDAVGWGF			9	1020.51	Deptor FRB	5	1024.45	0.010873	3.36473	0.011462	11.0401	0.007196				333	342
Deptor	333	342	IVGDAVGWGF			9	1020.51	Deptor FRB	50	1024.44	0.01999	3.35505	0.020316	11.0339	0.00738				333	342
Deptor	333	342	IVGDAVGWGF			9	1020.51	Deptor alone	0	1021.08	0.003626	0	0	11.0178	0.002146				333	342
Deptor	333	342	IVGDAVGWGF			9	1020.51	Deptor alone	0.05	1024.11	0.020677	3.02552	0.020992	11.0544	0.006073				333	342
Deptor	333	342	IVGDAVGWGF			9	1020.51	Deptor alone	0.5	1024.43	0.013199	3.34793	0.013687	11.0377	0.007035				333	342
Deptor	333	342	IVGDAVGWGF			9	1020.51	Deptor alone	5	1024.5	0.009912	3.41328	0.010555	11.0378	0.010041				333	342
Deptor	333	342	IVGDAVGWGF			9	1020.51	Deptor alone	50	1024.5	0.008261	3.41229	0.009021	11.0399	0.007854				333	342
Deptor	379	391	NVLHVDYRTVNNL			12	1556.82	Deptor FRB	0	1557.71	0.043193	0	0	7.55957	0.006951				379	391
Deptor	379	391	NVLHVDYRTVNNL			12	1556.82	Deptor FRB	0.05	1559.18	0.040149	1.47082	0.058971	7.5573	0.00437				379	391
Deptor	379	391	NVLHVDYRTVNNL			12	1556.82	Deptor FRB	0.5	1560.68	0.056599	2.96964	0.071197	7.54146	0.001617				379	391
Deptor	379	391	NVLHVDYRTVNNL			12	1556.82	Deptor FRB	5	1561.39	0.07732	3.67272	0.088566	7.54044	0.004215				379	391
Deptor	379	391	NVLHVDYRTVNNL			12	1556.82	Deptor FRB	50	1563.03	0.149774	5.31748	0.155878	7.53106	0.003718				379	391
Deptor	379	391	NVLHVDYRTVNNL			12	1556.82	Deptor alone	0	1557.71	0.043193	0	0	7.55957	0.006951				379	391
Deptor	379	391	NVLHVDYRTVNNL			12	1556.82	Deptor alone	0.05	1559.09	0.020057	1.3753	0.047622	7.57775	0.004233				379	391
Deptor	379	391	NVLHVDYRTVNNL			12	1556.82	Deptor alone	0.5	1560.75	0.061259	3.04093	0.074955	7.55301	0.006521				379	391
Deptor	379	391	NVLHVDYRTVNNL			12	1556.82	Deptor alone	5	1561.45	0.086202	3.73722	0.096418	7.55516	0.004318				379	391
Deptor	379	391	NVLHVDYRTVNNL			12	1556.82	Deptor alone	50	1563.06	0.083302	5.34841	0.093834	7.54421	0.006587				379	391
Deptor	380	388	VLHVDYRTV			8	1101.61	Deptor FRB	0	1102.57	0.040625	0	0	10.9321	0.002711				380	388
Deptor	380	388	VLHVDYRTV			8	1101.61	Deptor FRB	0.05	1102.82	0.020628	0.251901	0.045562	10.9561	0.007829				380	388
Deptor	380	388	VLHVDYRTV			8	1101.61	Deptor FRB	0.5	1102.86	0.012107	0.293827	0.042391	10.9413	0.000928				380	388
Deptor	380	388	VLHVDYRTV			8	1101.61	Deptor FRB	5	1103.04	0.022253	0.467346	0.046321	10.9433	0.007585				380	388
Deptor	380	388	VLHVDYRTV			8	1101.61	Deptor FRB	50	1103.82	0.046014	1.25247	0.061382	10.9326	0.006587				380	388
Deptor	380	388	VLHVDYRTV			8	1101.61	Deptor alone	0	1102.57	0.040625	0	0	10.9321	0.002711				380	388
Deptor	380	388	VLHVDYRTV			8	1101.61	Deptor alone	0.05	1102.77	0.072855	0.198222	0.083416	10.9649	0.006007				380	388
Deptor	380	388	VLHVDYRTV			8	1101.61	Deptor alone	0.5	1102.85	0.03976	0.282111	0.056844	10.944	0.006368				380	388
Deptor	380	388	VLHVDYRTV			8	1101.61	Deptor alone	5	1103.05	0.081312	0.48187	0.090896	10.9537	0.008612				380	388
Deptor	380	388	VLHVDYRTV			8	1101.61	Deptor alone	50	1103.85	0.05199	1.28415	0.06598	10.9375	0.007033				380	388
Deptor	382	390	HVDYRTVNN			8	1117.54	Deptor FRB	0	1118.12	0.007776	0	0	3.99086	0.006692				382	390
Deptor	382	390	HVDYRTVNN			8	1117.54	Deptor FRB	0.05	1119.42	0.014299	1.30028	0.016276	4.00441	0.003741				382	390
Deptor	382	390	HVDYRTVNN			8	1117.54	Deptor FRB	0.5	1120.39	0.01639	2.27303	0.018141	4.00168	0.001387				382	390
Deptor	382	390	HVDYRTVNN			8	1117.54	Deptor FRB	5	1120.84	0.015442	2.72232	0.017289	3.99038	0.003836				382	390
Deptor	382	390	HVDYRTVNN			8	1117.54	Deptor FRB	50	1121.61	0.015818	3.49028	0.017625	3.98492	0.005009				382	390
Deptor	382	390	HVDYRTVNN			8	1117.54	Deptor alone	0	1118.12	0.007776	0	0	3.99086	0.006692				382	390
Deptor	382	390	HVDYRTVNN			8	1117.54	Deptor alone	0.05	1119.33	0.001627	1.20843	0.007944	4.00703	0.008044				382	390
Deptor	382	390	HVDYRTVNN			8	1117.54	Deptor alone	0.5	1120.43	0.001317	2.31396	0.007886	4.00127	0.006475				382	390
Deptor	382	390	HVDYRTVNN			8	1117.54	Deptor alone	5	1120.87	0.02232	2.75229	0.023635	3.99748	0.007163				382	390
Deptor	382	390	HVDYRTVNN			8	1117.54	Deptor alone	50	1121.63	0.017706	3.50994	0.019338	3.99408	0.00666				382	390
Deptor	382	391	HVDYRTVNNL			9	1230.62	Deptor FRB	0	1231.32	0.019353	0	0	5.97946	0.007482				382	391
Deptor	382	391	HVDYRTVNNL			9	1230.62	Deptor FRB	0.05	1232.62	0.047452	1.29307	0.051247	5.97925	0.002842				382	391
Deptor	382	391	HVDYRTVNNL			9	1230.62	Deptor FRB	0.5	1233.6	0.027339	2.27305	0.033496	5.96379	0.001732				382	391
Deptor	382	391	HVDYRTVNNL			9	1230.62	Deptor FRB	5	1234.22	0.012466	2.89023	0.02302	5.96082	0.003306				382	391
Deptor	382	391	HVDYRTVNNL			9	1230.62	Deptor FRB	50	1235.44	0.025205	4.11056	0.031778	5.94838	0.003577				382	391
Deptor	382	391	HVDYRTVNNL			9	1230.62	Deptor alone	0	1231.32	0.019353	0	0	5.97946	0.007482				382	391
Deptor	382	391	HVDYRTVNNL			9	1230.62	Deptor alone	0.05	1232.53	0.011914	1.20905	0.022727	6.00057	0.003786				382	391
Deptor	382	391	HVDYRTVNNL			9	1230.62	Deptor alone	0.5	1233.65	0.030779	2.32313	0.036358	5.97713	0.005949				382	391
Deptor	382	391	HVDYRTVNNL			9	1230.62	Deptor alone	5	1234.22	0.015392	2.89849	0.024728	5.97717	0.004373				382	391
Deptor	382	391	HVDYRTVNNL			9	1230.62	Deptor alone	50	1235.47	0.015674	4.1473	0.024904	5.96491	0.006939				382	391
Deptor	386	393	RTVNNLIL			7	942.573	Deptor FRB	0	943.078	0.008552	0	0	8.05482	0.007914				386	393
Deptor	386	393	RTVNNLIL			7	942.573	Deptor FRB	0.05	943.2	0.012961	0.122064	0.015528	8.02219	0.002518				386	393
Deptor	386	393	RTVNNLIL			7	942.573	Deptor FRB	0.5	943.491	0.024415	0.413762	0.025869	8.00558	0.001541				386	393
Deptor	386	393	RTVNNLIL			7	942.573	Deptor FRB	5	944.22	0.028142	1.1426	0.029413	8.00293	0.004128				386	393
Deptor	386	393	RTVNNLIL			7	942.573	Deptor FRB	50	945.847	0.019495	2.7698	0.021288	7.98233	0.018789				386	393
Deptor	386	393	RTVNNLIL			7	942.573	Deptor alone	0	943.078	0.008552	0	0	8.05482	0.007914				386	393
Deptor	386	393	RTVNNLIL			7	942.573	Deptor alone	0.05	943.181	0.005472	0.103241	0.010153	8.06518	0.015597				386	393
Deptor	386	393	RTVNNLIL			7	942.573	Deptor alone	0.5	943.493	0.019176	0.41525	0.020996	8.05062	0.006904				386	393
Deptor	386	393	RTVNNLIL			7	942.573	Deptor alone	5	944.208	0.016643	1.13037	0.018712	8.05003	0.003994				386	393
Deptor	386	393	RTVNNLIL			7	942.573	Deptor alone	50	945.849	0.013233	2.77143	0.015755	8.03828	0.006707				386	393
Deptor	392	398	ILTGPRT			5	757.457	Deptor FRB	0	757.82	0.009863	0	0	4.69269	0.011824				392	398
Deptor	392	398	ILTGPRT			5	757.457	Deptor FRB	0.05	759.777	0.010413	1.95738	0.014343	4.71059	0.004657				392	398
Deptor	392	398	ILTGPRT			5	757.457	Deptor FRB	0.5	760.594	0.008058	2.77447	0.012736	4.70279	0.001699				392	398
Deptor	392	398	ILTGPRT			5	757.457	Deptor FRB	5	760.614	0.005109	2.79419	0.011108	4.69642	0.00266				392	398
Deptor	392	398	ILTGPRT			5	757.457	Deptor FRB	50	760.618	0.006133	2.79816	0.011614	4.69007	0.004602				392	398
Deptor	392	398	ILTGPRT			5	757.457	Deptor alone	0	757.82	0.009863	0	0	4.69269	0.011824				392	398
Deptor	392	398	ILTGPRT			5	757.457	Deptor alone	0.05	759.726	0.013653	1.90637	0.016843	4.72164	0.003346				392	398
Deptor	392	398	ILTGPRT			5	757.457	Deptor alone	0.5	760.624	0.010532	2.80464	0.01443	4.70818	0.005512				392	398
Deptor	392	398	ILTGPRT			5	757.457	Deptor alone	5	760.639	0.009135	2.81927	0.013444	4.70703	0.005329				392	398
Deptor	392	398	ILTGPRT			5	757.457	Deptor alone	50	760.643	0.015176	2.82306	0.018099	4.7014	0.006612				392	398
Deptor	392	400	ILTGPRTIV			7	969.609	Deptor FRB	0	970.113	0.007808	0	0	6.93724	0.00805				392	400
Deptor	392	400	ILTGPRTIV			7	969.609	Deptor FRB	0.05	971.825	0.016822	1.71157	0.018546	6.94823	0.0056				392	400
Deptor	392	400	ILTGPRTIV			7	969.609	Deptor FRB	0.5	972.503	0.015485	2.38954	0.017342	6.93913	0.000877				392	400
Deptor	392	400	ILTGPRTIV			7	969.609	Deptor FRB	5	972.544	0.016281	2.4302	0.018056	6.94406	0.004207				392	400
Deptor	392	400	ILTGPRTIV			7	969.609	Deptor FRB	50	972.773	0.02048	2.65949	0.021918	6.93794	0.004368				392	400
Deptor	392	400	ILTGPRTIV			7	969.609	Deptor alone	0	970.113	0.007808	0	0	6.93724	0.00805				392	400
Deptor	392	400	ILTGPRTIV			7	969.609	Deptor alone	0.05	971.797	0.01599	1.68347	0.017795	6.95885	0.003869				392	400
Deptor	392	400	ILTGPRTIV			7	969.609	Deptor alone	0.5	972.541	0.006049	2.42781	0.009876	6.94105	0.006091				392	400
Deptor	392	400	ILTGPRTIV			7	969.609	Deptor alone	5	972.584	0.007464	2.4703	0.010801	6.94934	0.00368				392	400
Deptor	392	400	ILTGPRTIV			7	969.609	Deptor alone	50	972.809	0.009404	2.69555	0.012223	6.94499	0.006951				392	400
Deptor	393	401	LTGPRTIVM			7	987.566	Deptor FRB	0	988.183	0.003531	0	0	7.8016	0.007221				393	401
Deptor	393	401	LTGPRTIVM			7	987.566	Deptor FRB	0.05	989.578	0.004742	1.39493	0.005912	7.79704	0.003316				393	401
Deptor	393	401	LTGPRTIVM			7	987.566	Deptor FRB	0.5	990.178	0.014036	1.9951	0.014474	7.78263	0.000235				393	401
Deptor	393	401	LTGPRTIVM			7	987.566	Deptor FRB	5	990.217	0.002662	2.03369	0.004422	7.78367	0.004611				393	401
Deptor	393	401	LTGPRTIVM			7	987.566	Deptor FRB	50	990.477	0.014294	2.29408	0.014724	7.75687	0.028987				393	401
Deptor	393	401	LTGPRTIVM			7	987.566	Deptor alone	0	988.183	0.003531	0	0	7.8016	0.007221				393	401
Deptor	393	401	LTGPRTIVM			7	987.566	Deptor alone	0.05	989.566	0.001467	1.38262	0.003823	7.82265	0.004069				393	401
Deptor	393	401	LTGPRTIVM			7	987.566	Deptor alone	0.5	990.245	0.003945	2.06218	0.005295	7.80042	0.005514				393	401
Deptor	393	401	LTGPRTIVM			7	987.566	Deptor alone	5	990.266	0.007905	2.08272	0.008658	7.80399	0.004504				393	401
Deptor	393	401	LTGPRTIVM			7	987.566	Deptor alone	50	990.489	0.011272	2.30623	0.011812	7.79745	0.00691				393	401
Deptor	395	401	GPRTIVM			5	773.434	Deptor FRB	0	773.952	0.004149	0	0	7.80165	0.00686				395	401
Deptor	395	401	GPRTIVM			5	773.434	Deptor FRB	0.05	775.026	0.016111	1.07451	0.016637	7.79641	0.003554				395	401
Deptor	395	401	GPRTIVM			5	773.434	Deptor FRB	0.5	775.496	0.022425	1.54388	0.022806	7.7834	0.000636				395	401
Deptor	395	401	GPRTIVM			5	773.434	Deptor FRB	5	775.589	0.023271	1.63679	0.023638	7.78385	0.004496				395	401
Deptor	395	401	GPRTIVM			5	773.434	Deptor FRB	50	775.737	0.01353	1.78569	0.014152	7.75872	0.027996				395	401
Deptor	395	401	GPRTIVM			5	773.434	Deptor alone	0	773.952	0.004149	0	0	7.80165	0.00686				395	401
Deptor	395	401	GPRTIVM			5	773.434	Deptor alone	0.05	775.045	0.012954	1.09313	0.013603	7.82189	0.004375				395	401
Deptor	395	401	GPRTIVM			5	773.434	Deptor alone	0.5	775.54	0.012364	1.58804	0.013041	7.80076	0.006001				395	401
Deptor	395	401	GPRTIVM			5	773.434	Deptor alone	5	775.632	0.01934	1.67979	0.01978	7.8042	0.00458				395	401
Deptor	395	401	GPRTIVM			5	773.434	Deptor alone	50	775.774	0.020003	1.82249	0.020429	7.79752	0.006186				395	401
